# Supplementary material for: Lung neuroendocrine tumours: deep sequencing of the four World Health Organization histotypes reveals chromatin‐remodelling genes as major players and a prognostic role for TERT, RB1, MEN1 and KMT2D
Source: PubMed Central journal article supplement (PMC5324596; doi:10.1002/path.4853), 2016-12-29
Supplement: PATH-241-488-s008.pdf [file PATH-241-488-s008.pdf]

**Supplementary Table S1 :** Ampliseq custom panels used for validation of mutations in 88 genes and copy number alterations (CNA) in 13 genes

**LNET Custom Panel 1**  
for mutational analysis

| GENE   | CHR  | START    | END      |
|--------|------|----------|----------|
| ARID1A | chr1 | 27023412 | 27023521 |
| ARID1A | chr1 | 27024045 | 27024151 |
| ARID1A | chr1 | 27055998 | 27056119 |
| ARID1A | chr1 | 27056108 | 27056238 |
| ARID1A | chr1 | 27056216 | 27056335 |
| ARID1A | chr1 | 27056308 | 27056406 |
| ARID1A | chr1 | 27057575 | 27057695 |
| ARID1A | chr1 | 27057684 | 27057817 |
| ARID1A | chr1 | 27057809 | 27057940 |
| ARID1A | chr1 | 27057916 | 27058047 |
| ARID1A | chr1 | 27058069 | 27058149 |
| ARID1A | chr1 | 27059115 | 27059243 |
| ARID1A | chr1 | 27059232 | 27059333 |
| ARID1A | chr1 | 27087282 | 27087405 |
| ARID1A | chr1 | 27087371 | 27087442 |
| ARID1A | chr1 | 27087477 | 27087606 |
| ARID1A | chr1 | 27087599 | 27087705 |
| ARID1A | chr1 | 27087816 | 27087941 |
| ARID1A | chr1 | 27087936 | 27088019 |
| ARID1A | chr1 | 27088576 | 27088700 |
| ARID1A | chr1 | 27088658 | 27088752 |
| ARID1A | chr1 | 27088741 | 27088860 |
| ARID1A | chr1 | 27089349 | 27089478 |
| ARID1A | chr1 | 27089445 | 27089557 |
| ARID1A | chr1 | 27089602 | 27089710 |
| ARID1A | chr1 | 27089672 | 27089751 |
| ARID1A | chr1 | 27092654 | 27092779 |
| ARID1A | chr1 | 27092768 | 27092863 |
| ARID1A | chr1 | 27092852 | 27092932 |
| ARID1A | chr1 | 27092921 | 27093035 |
| ARID1A | chr1 | 27093022 | 27093107 |
| ARID1A | chr1 | 27094226 | 27094352 |

**LNET Custom Panel 2**  
for mutational analysis

| GENE  | CHR  | START     | END       |
|-------|------|-----------|-----------|
| CSMD3 | chr8 | 113236965 | 113237091 |
| CSMD3 | chr8 | 113237080 | 113237179 |
| CSMD3 | chr8 | 113240930 | 113241041 |
| CSMD3 | chr8 | 113241030 | 113241097 |
| CSMD3 | chr8 | 113243758 | 113243875 |
| CSMD3 | chr8 | 113246540 | 113246623 |
| CSMD3 | chr8 | 113246612 | 113246705 |
| CSMD3 | chr8 | 113246701 | 113246810 |
| CSMD3 | chr8 | 113249405 | 113249480 |
| CSMD3 | chr8 | 113249469 | 113249590 |
| CSMD3 | chr8 | 113253902 | 113254006 |
| CSMD3 | chr8 | 113253995 | 113254098 |
| CSMD3 | chr8 | 113256567 | 113256692 |
| CSMD3 | chr8 | 113256681 | 113256796 |
| CSMD3 | chr8 | 113259193 | 113259293 |
| CSMD3 | chr8 | 113259282 | 113259394 |
| CSMD3 | chr8 | 113266437 | 113266526 |
| CSMD3 | chr8 | 113266515 | 113266595 |
| CSMD3 | chr8 | 113267468 | 113267542 |
| CSMD3 | chr8 | 113267531 | 113267607 |
| CSMD3 | chr8 | 113267596 | 113267710 |
| CSMD3 | chr8 | 113275814 | 113275935 |
| CSMD3 | chr8 | 113275926 | 113276049 |
| CSMD3 | chr8 | 113277629 | 113277727 |
| CSMD3 | chr8 | 113277716 | 113277829 |
| CSMD3 | chr8 | 113293312 | 113293436 |
| CSMD3 | chr8 | 113293426 | 113293505 |
| CSMD3 | chr8 | 113293494 | 113293610 |
| CSMD3 | chr8 | 113299202 | 113299316 |
| CSMD3 | chr8 | 113299303 | 113299377 |
| CSMD3 | chr8 | 113299366 | 113299487 |
| CSMD3 | chr8 | 113301474 | 113301598 |

**LNET Custom Panel 3**  
for mutational and CNA analysis

| GENE  | CHR   | START    | END      |
|-------|-------|----------|----------|
| BCL2  | chr18 | 60795735 | 60795844 |
| BCL2  | chr18 | 60795833 | 60795937 |
| BCL2  | chr18 | 60795928 | 60796058 |
| BCL2  | chr18 | 60985202 | 60985322 |
| BCL2  | chr18 | 60985309 | 60985439 |
| BCL2  | chr18 | 60985428 | 60985538 |
| BCL2  | chr18 | 60985518 | 60985612 |
| BCL2  | chr18 | 60985627 | 60985744 |
| BCL2  | chr18 | 60985761 | 60985854 |
| BCL2  | chr18 | 60985843 | 60985965 |
| FGFR1 | chr8  | 38271444 | 38271567 |
| FGFR1 | chr8  | 38271685 | 38271812 |
| FGFR1 | chr8  | 38272269 | 38272345 |
| FGFR1 | chr8  | 38275047 | 38275130 |
| FGFR1 | chr8  | 38279309 | 38279403 |
| FGFR1 | chr8  | 38281234 | 38281342 |
| FGFR1 | chr8  | 38282140 | 38282254 |
| FGFR1 | chr8  | 38283567 | 38283689 |
| FGFR1 | chr8  | 38285430 | 38285526 |
| FGFR1 | chr8  | 38285848 | 38285945 |
| FGFR1 | chr8  | 38285851 | 38285975 |
| FGFR1 | chr8  | 38287084 | 38287208 |
| FGFR1 | chr8  | 38289028 | 38289147 |
| FGFR1 | chr8  | 38292214 | 38292289 |
| FGFR1 | chr8  | 38293010 | 38293121 |
| FGFR1 | chr8  | 38299647 | 38299726 |
| FGFR1 | chr8  | 38306706 | 38306803 |
| FGFR1 | chr8  | 38308209 | 38308324 |
| FGFR1 | chr8  | 38308589 | 38308683 |
| FGFR1 | chr8  | 38314987 | 38315089 |
| FGFR1 | chr8  | 38315534 | 38315644 |
| MEN1  | chr11 | 64571750 | 64571847 |

|        |      |          |          |       |      |           |           |       |       |           |           |
|--------|------|----------|----------|-------|------|-----------|-----------|-------|-------|-----------|-----------|
| ARID1A | chr1 | 27094333 | 27094458 | CSMD3 | chr8 | 113301587 | 113301698 | MEN1  | chr11 | 64571847  | 64571973  |
| ARID1A | chr1 | 27094447 | 27094540 | CSMD3 | chr8 | 113301687 | 113301801 | MEN1  | chr11 | 64571973  | 64572103  |
| ARID1A | chr1 | 27097521 | 27097634 | CSMD3 | chr8 | 113303704 | 113303817 | MEN1  | chr11 | 64572141  | 64572263  |
| ARID1A | chr1 | 27097623 | 27097709 | CSMD3 | chr8 | 113303806 | 113303916 | MEN1  | chr11 | 64572181  | 64572304  |
| ARID1A | chr1 | 27097698 | 27097780 | CSMD3 | chr8 | 113303916 | 113304035 | MEN1  | chr11 | 64572475  | 64572602  |
| ARID1A | chr1 | 27097777 | 27097876 | CSMD3 | chr8 | 113304747 | 113304848 | MEN1  | chr11 | 64572601  | 64572693  |
| ARID1A | chr1 | 27098849 | 27098969 | CSMD3 | chr8 | 113304837 | 113304959 | MEN1  | chr11 | 64573066  | 64573197  |
| ARID1A | chr1 | 27098958 | 27099081 | CSMD3 | chr8 | 113308042 | 113308111 | MEN1  | chr11 | 64573197  | 64573279  |
| ARID1A | chr1 | 27099070 | 27099157 | CSMD3 | chr8 | 113308100 | 113308213 | MEN1  | chr11 | 64573658  | 64573788  |
| ARID1A | chr1 | 27099250 | 27099334 | CSMD3 | chr8 | 113308202 | 113308290 | MEN1  | chr11 | 64573788  | 64573923  |
| ARID1A | chr1 | 27099323 | 27099432 | CSMD3 | chr8 | 113313967 | 113314047 | MEN1  | chr11 | 64574457  | 64574583  |
| ARID1A | chr1 | 27099421 | 27099537 | CSMD3 | chr8 | 113314036 | 113314116 | MEN1  | chr11 | 64574603  | 64574734  |
| ARID1A | chr1 | 27099719 | 27099846 | CSMD3 | chr8 | 113314105 | 113314218 | MEN1  | chr11 | 64575058  | 64575171  |
| ARID1A | chr1 | 27099835 | 27099966 | CSMD3 | chr8 | 113316907 | 113316975 | MEN1  | chr11 | 64575328  | 64575456  |
| ARID1A | chr1 | 27099964 | 27100058 | CSMD3 | chr8 | 113316964 | 113317060 | MEN1  | chr11 | 64575453  | 64575577  |
| ARID1A | chr1 | 27100047 | 27100153 | CSMD3 | chr8 | 113317049 | 113317154 | MEN1  | chr11 | 64577098  | 64577212  |
| ARID1A | chr1 | 27100142 | 27100260 | CSMD3 | chr8 | 113318222 | 113318325 | MEN1  | chr11 | 64577212  | 64577323  |
| ARID1A | chr1 | 27100218 | 27100303 | CSMD3 | chr8 | 113318314 | 113318433 | MEN1  | chr11 | 64577317  | 64577437  |
| ARID1A | chr1 | 27100388 | 27100460 | CSMD3 | chr8 | 113323160 | 113323263 | MEN1  | chr11 | 64577435  | 64577548  |
| ARID1A | chr1 | 27100745 | 27100876 | CSMD3 | chr8 | 113323252 | 113323341 | MEN1  | chr11 | 64577539  | 64577670  |
| ARID1A | chr1 | 27100855 | 27100984 | CSMD3 | chr8 | 113323330 | 113323436 | MYC   | chr8  | 128748773 | 128748860 |
| ARID1A | chr1 | 27101006 | 27101125 | CSMD3 | chr8 | 113326074 | 113326188 | MYC   | chr8  | 128748849 | 128748926 |
| ARID1A | chr1 | 27101097 | 27101178 | CSMD3 | chr8 | 113326183 | 113326264 | MYC   | chr8  | 128750342 | 128750453 |
| ARID1A | chr1 | 27101162 | 27101283 | CSMD3 | chr8 | 113326262 | 113326365 | MYC   | chr8  | 128750445 | 128750545 |
| ARID1A | chr1 | 27101310 | 27101442 | CSMD3 | chr8 | 113326578 | 113326682 | MYC   | chr8  | 128750534 | 128750648 |
| ARID1A | chr1 | 27101330 | 27101462 | CSMD3 | chr8 | 113326671 | 113326762 | MYC   | chr8  | 128750615 | 128750738 |
| ARID1A | chr1 | 27101538 | 27101669 | CSMD3 | chr8 | 113326751 | 113326860 | MYC   | chr8  | 128750734 | 128750866 |
| ARID1A | chr1 | 27101660 | 27101761 | CSMD3 | chr8 | 113330969 | 113331087 | MYC   | chr8  | 128750855 | 128750934 |
| ARID1A | chr1 | 27101996 | 27102119 | CSMD3 | chr8 | 113331076 | 113331196 | MYC   | chr8  | 128750914 | 128751032 |
| ARID1A | chr1 | 27102106 | 27102190 | CSMD3 | chr8 | 113332106 | 113332232 | MYC   | chr8  | 128751050 | 128751175 |
| ARID1A | chr1 | 27102179 | 27102253 | CSMD3 | chr8 | 113347526 | 113347616 | MYC   | chr8  | 128751171 | 128751284 |
| ARID1A | chr1 | 27105423 | 27105539 | CSMD3 | chr8 | 113347605 | 113347715 | MYC   | chr8  | 128751274 | 128751349 |
| ARID1A | chr1 | 27105528 | 27105633 | CSMD3 | chr8 | 113348807 | 113348931 | MYC   | chr8  | 128752582 | 128752704 |
| ARID1A | chr1 | 27105621 | 27105737 | CSMD3 | chr8 | 113348931 | 113349002 | MYC   | chr8  | 128752693 | 128752788 |
| ARID1A | chr1 | 27105726 | 27105849 | CSMD3 | chr8 | 113348991 | 113349095 | MYC   | chr8  | 128752844 | 128752935 |
| ARID1A | chr1 | 27105838 | 27105963 | CSMD3 | chr8 | 113349759 | 113349876 | MYC   | chr8  | 128752914 | 128753030 |
| ARID1A | chr1 | 27105955 | 27106049 | CSMD3 | chr8 | 113349865 | 113349985 | MYC   | chr8  | 128753008 | 128753107 |
| ARID1A | chr1 | 27106046 | 27106167 | CSMD3 | chr8 | 113353597 | 113353714 | MYC   | chr8  | 128753096 | 128753175 |
| ARID1A | chr1 | 27106156 | 27106286 | CSMD3 | chr8 | 113353728 | 113353826 | MYC   | chr8  | 128753164 | 128753254 |
| ARID1A | chr1 | 27106263 | 27106384 | CSMD3 | chr8 | 113353815 | 113353929 | MYCL1 | chr1  | 40362935  | 40363054  |

|        |      |          |          |       |      |           |           |        |      |           |           |
|--------|------|----------|----------|-------|------|-----------|-----------|--------|------|-----------|-----------|
| ARID1A | chr1 | 27106382 | 27106514 | CSMD3 | chr8 | 113358235 | 113358354 | MYCL1  | chr1 | 40363027  | 40363101  |
| ARID1A | chr1 | 27106506 | 27106625 | CSMD3 | chr8 | 113358346 | 113358452 | MYCL1  | chr1 | 40363156  | 40363272  |
| ARID1A | chr1 | 27106616 | 27106732 | CSMD3 | chr8 | 113363294 | 113363407 | MYCL1  | chr1 | 40363183  | 40363300  |
| ARID1A | chr1 | 27106684 | 27106772 | CSMD3 | chr8 | 113363438 | 113363552 | MYCL1  | chr1 | 40363403  | 40363511  |
| ARID1A | chr1 | 27106837 | 27106951 | CSMD3 | chr8 | 113364622 | 113364697 | MYCL1  | chr1 | 40363489  | 40363588  |
| ARID1A | chr1 | 27106865 | 27106981 | CSMD3 | chr8 | 113364686 | 113364782 | MYCL1  | chr1 | 40363615  | 40363693  |
| ARID1A | chr1 | 27107058 | 27107151 | CSMD3 | chr8 | 113392563 | 113392677 | MYCL1  | chr1 | 40366400  | 40366517  |
| ARID1A | chr1 | 27107140 | 27107217 | CSMD3 | chr8 | 113392632 | 113392702 | MYCL1  | chr1 | 40366490  | 40366599  |
| ARID1A | chr1 | 27107206 | 27107297 | CSMD3 | chr8 | 113395733 | 113395833 | MYCL1  | chr1 | 40366572  | 40366697  |
| ARID1A | chr1 | 27023113 | 27023236 | CSMD3 | chr8 | 113395822 | 113395930 | MYCL1  | chr1 | 40366666  | 40366772  |
| ARID1A | chr1 | 27023236 | 27023335 | CSMD3 | chr8 | 113402813 | 113402931 | MYCL1  | chr1 | 40366856  | 40366992  |
| ARID1A | chr1 | 27023355 | 27023491 | CSMD3 | chr8 | 113402923 | 113403030 | MYCL1  | chr1 | 40366897  | 40367010  |
| ARID1A | chr1 | 27023413 | 27023517 | CSMD3 | chr8 | 113418754 | 113418818 | PIK3CA | chr3 | 178870451 | 178870541 |
| ARID1A | chr1 | 27023684 | 27023776 | CSMD3 | chr8 | 113418807 | 113418886 | PIK3CA | chr3 | 178870885 | 178870997 |
| ARID1A | chr1 | 27023697 | 27023836 | CSMD3 | chr8 | 113418875 | 113418991 | PIK3CA | chr3 | 178873968 | 178874080 |
| ARID1A | chr1 | 27024034 | 27024137 | CSMD3 | chr8 | 113420499 | 113420606 | PIK3CA | chr3 | 178878790 | 178878899 |
| ARID1A | chr1 | 27056119 | 27056237 | CSMD3 | chr8 | 113420595 | 113420713 | PIK3CA | chr3 | 178881262 | 178881358 |
| ARID1A | chr1 | 27056232 | 27056362 | CSMD3 | chr8 | 113421124 | 113421197 | PIK3CA | chr3 | 178882865 | 178882976 |
| ARID1A | chr1 | 27057577 | 27057702 | CSMD3 | chr8 | 113421186 | 113421279 | PIK3CA | chr3 | 178884569 | 178884673 |
| ARID1A | chr1 | 27057702 | 27057827 | CSMD3 | chr8 | 113484798 | 113484914 | PIK3CA | chr3 | 178898207 | 178898277 |
| ARID1A | chr1 | 27057827 | 27057961 | CSMD3 | chr8 | 113504619 | 113504744 | PIK3CA | chr3 | 178910028 | 178910134 |
| ARID1A | chr1 | 27057956 | 27058065 | CSMD3 | chr8 | 113504733 | 113504834 | PIK3CA | chr3 | 178910292 | 178910352 |
| ARID1A | chr1 | 27058060 | 27058143 | CSMD3 | chr8 | 113504823 | 113504936 | PIK3CA | chr3 | 178910848 | 178910935 |
| ARID1A | chr1 | 27059099 | 27059226 | CSMD3 | chr8 | 113515948 | 113516057 | PIK3CA | chr3 | 178916679 | 178916785 |
| ARID1A | chr1 | 27059226 | 27059320 | CSMD3 | chr8 | 113516046 | 113516115 | PIK3CA | chr3 | 178916775 | 178916881 |
| ARID1A | chr1 | 27087254 | 27087381 | CSMD3 | chr8 | 113516104 | 113516216 | PIK3CA | chr3 | 178916844 | 178916930 |
| ARID1A | chr1 | 27087378 | 27087463 | CSMD3 | chr8 | 113518872 | 113518951 | PIK3CA | chr3 | 178916931 | 178917035 |
| ARID1A | chr1 | 27087463 | 27087593 | CSMD3 | chr8 | 113518940 | 113519018 | PIK3CA | chr3 | 178917406 | 178917494 |
| ARID1A | chr1 | 27087846 | 27087928 | CSMD3 | chr8 | 113519007 | 113519124 | PIK3CA | chr3 | 178917416 | 178917537 |
| ARID1A | chr1 | 27087928 | 27088027 | CSMD3 | chr8 | 113529212 | 113529315 | PIK3CA | chr3 | 178918889 | 178918972 |
| ARID1A | chr1 | 27088591 | 27088717 | CSMD3 | chr8 | 113529304 | 113529396 | PIK3CA | chr3 | 178920590 | 178920694 |
| ARID1A | chr1 | 27088715 | 27088825 | CSMD3 | chr8 | 113529378 | 113529489 | PIK3CA | chr3 | 178921464 | 178921570 |
| ARID1A | chr1 | 27089430 | 27089556 | CSMD3 | chr8 | 113562879 | 113562984 | PIK3CA | chr3 | 178922252 | 178922365 |
| ARID1A | chr1 | 27089548 | 27089662 | CSMD3 | chr8 | 113562973 | 113563075 | PIK3CA | chr3 | 178927405 | 178927525 |
| ARID1A | chr1 | 27089661 | 27089788 | CSMD3 | chr8 | 113563064 | 113563163 | PIK3CA | chr3 | 178927901 | 178927986 |
| ARID1A | chr1 | 27092652 | 27092766 | CSMD3 | chr8 | 113564787 | 113564867 | PIK3CA | chr3 | 178928069 | 178928160 |
| ARID1A | chr1 | 27092766 | 27092871 | CSMD3 | chr8 | 113564856 | 113564970 | PIK3CA | chr3 | 178936023 | 178936105 |
| ARID1A | chr1 | 27092879 | 27093004 | CSMD3 | chr8 | 113568911 | 113569032 | PIK3CA | chr3 | 178936052 | 178936179 |
| ARID1A | chr1 | 27093004 | 27093107 | CSMD3 | chr8 | 113569020 | 113569122 | PIK3CA | chr3 | 178938787 | 178938918 |
| ARID1A | chr1 | 27094197 | 27094298 | CSMD3 | chr8 | 113569111 | 113569200 | PIK3CA | chr3 | 178938831 | 178938960 |

|        |      |          |          |       |      |           |           |        |       |           |           |
|--------|------|----------|----------|-------|------|-----------|-----------|--------|-------|-----------|-----------|
| ARID1A | chr1 | 27094298 | 27094424 | CSMD3 | chr8 | 113585714 | 113585826 | PIK3CA | chr3  | 178944129 | 178944243 |
| ARID1A | chr1 | 27094424 | 27094537 | CSMD3 | chr8 | 113585815 | 113585916 | PIK3CA | chr3  | 178944326 | 178944439 |
| ARID1A | chr1 | 27097584 | 27097698 | CSMD3 | chr8 | 113599182 | 113599299 | PIK3CA | chr3  | 178945307 | 178945413 |
| ARID1A | chr1 | 27097698 | 27097779 | CSMD3 | chr8 | 113599299 | 113599413 | PIK3CA | chr3  | 178947818 | 178947896 |
| ARID1A | chr1 | 27097779 | 27097903 | CSMD3 | chr8 | 113599403 | 113599518 | PIK3CA | chr3  | 178947985 | 178948083 |
| ARID1A | chr1 | 27098908 | 27099036 | CSMD3 | chr8 | 113649031 | 113649155 | PIK3CA | chr3  | 178951914 | 178951991 |
| ARID1A | chr1 | 27099036 | 27099164 | CSMD3 | chr8 | 113649144 | 113649268 | PIK3CA | chr3  | 178951996 | 178952097 |
| ARID1A | chr1 | 27099250 | 27099376 | CSMD3 | chr8 | 113650908 | 113651006 | PIK3CA | chr3  | 178952140 | 178952237 |
| ARID1A | chr1 | 27099376 | 27099485 | CSMD3 | chr8 | 113650995 | 113651085 | RB1    | chr13 | 48878051  | 48878181  |
| ARID1A | chr1 | 27099829 | 27099944 | CSMD3 | chr8 | 113651074 | 113651168 | RB1    | chr13 | 48878193  | 48878331  |
| ARID1A | chr1 | 27099939 | 27100026 | CSMD3 | chr8 | 113657250 | 113657368 | RB1    | chr13 | 48881337  | 48881436  |
| ARID1A | chr1 | 27100047 | 27100153 | CSMD3 | chr8 | 113657357 | 113657464 | RB1    | chr13 | 48881430  | 48881538  |
| ARID1A | chr1 | 27100151 | 27100274 | CSMD3 | chr8 | 113662275 | 113662395 | RB1    | chr13 | 48881536  | 48881656  |
| ARID1A | chr1 | 27100271 | 27100408 | CSMD3 | chr8 | 113662384 | 113662475 | RB1    | chr13 | 48916693  | 48916804  |
| ARID1A | chr1 | 27100757 | 27100894 | CSMD3 | chr8 | 113662464 | 113662588 | RB1    | chr13 | 48916793  | 48916898  |
| ARID1A | chr1 | 27100894 | 27101000 | CSMD3 | chr8 | 113668359 | 113668484 | RB1    | chr13 | 48919129  | 48919237  |
| ARID1A | chr1 | 27101000 | 27101091 | CSMD3 | chr8 | 113668444 | 113668514 | RB1    | chr13 | 48919225  | 48919319  |
| ARID1A | chr1 | 27101088 | 27101192 | CSMD3 | chr8 | 113678399 | 113678522 | RB1    | chr13 | 48919324  | 48919439  |
| ARID1A | chr1 | 27101191 | 27101310 | CSMD3 | chr8 | 113678511 | 113678620 | RB1    | chr13 | 48921963  | 48922047  |
| ARID1A | chr1 | 27101310 | 27101441 | CSMD3 | chr8 | 113678609 | 113678709 | RB1    | chr13 | 48923021  | 48923134  |
| ARID1A | chr1 | 27101436 | 27101545 | CSMD3 | chr8 | 113694602 | 113694673 | RB1    | chr13 | 48923123  | 48923192  |
| ARID1A | chr1 | 27101545 | 27101642 | CSMD3 | chr8 | 113694662 | 113694781 | RB1    | chr13 | 48934100  | 48934221  |
| ARID1A | chr1 | 27101641 | 27101750 | CSMD3 | chr8 | 113694770 | 113694886 | RB1    | chr13 | 48934210  | 48934282  |
| ARID1A | chr1 | 27102059 | 27102138 | CSMD3 | chr8 | 113697561 | 113697679 | RB1    | chr13 | 48936960  | 48937044  |
| ARID1A | chr1 | 27102138 | 27102219 | CSMD3 | chr8 | 113697668 | 113697794 | RB1    | chr13 | 48937033  | 48937120  |
| ARID1A | chr1 | 27105423 | 27105540 | CSMD3 | chr8 | 113697783 | 113697883 | RB1    | chr13 | 48938955  | 48939069  |
| ARID1A | chr1 | 27105540 | 27105641 | CSMD3 | chr8 | 113697872 | 113697960 | RB1    | chr13 | 48939034  | 48939130  |
| ARID1A | chr1 | 27105640 | 27105756 | CSMD3 | chr8 | 113697964 | 113698083 | RB1    | chr13 | 48941602  | 48941717  |
| ARID1A | chr1 | 27105756 | 27105848 | CSMD3 | chr8 | 113702075 | 113702196 | RB1    | chr13 | 48941706  | 48941808  |
| ARID1A | chr1 | 27105848 | 27105962 | CSMD3 | chr8 | 113702185 | 113702289 | RB1    | chr13 | 48942595  | 48942699  |
| ARID1A | chr1 | 27105962 | 27106049 | CSMD3 | chr8 | 113812311 | 113812434 | RB1    | chr13 | 48942688  | 48942783  |
| ARID1A | chr1 | 27106046 | 27106173 | CSMD3 | chr8 | 113812423 | 113812518 | RB1    | chr13 | 48947516  | 48947611  |
| ARID1A | chr1 | 27106172 | 27106284 | CSMD3 | chr8 | 113841837 | 113841952 | RB1    | chr13 | 48947620  | 48947733  |
| ARID1A | chr1 | 27106282 | 27106363 | CSMD3 | chr8 | 113841941 | 113842046 | RB1    | chr13 | 48950955  | 48951067  |
| ARID1A | chr1 | 27106363 | 27106494 | CSMD3 | chr8 | 113871315 | 113871406 | RB1    | chr13 | 48951059  | 48951169  |
| ARID1A | chr1 | 27106494 | 27106573 | CSMD3 | chr8 | 113871395 | 113871507 | RB1    | chr13 | 48951161  | 48951274  |
| ARID1A | chr1 | 27106571 | 27106663 | CSMD3 | chr8 | 113933797 | 113933903 | RB1    | chr13 | 48953704  | 48953766  |
| ARID1A | chr1 | 27106661 | 27106760 | CSMD3 | chr8 | 113933892 | 113934012 | RB1    | chr13 | 48953755  | 48953872  |
| ARID1A | chr1 | 27106760 | 27106852 | CSMD3 | chr8 | 113959936 | 113960060 | RB1    | chr13 | 48954206  | 48954289  |
| ARID1A | chr1 | 27106850 | 27106958 | CSMD3 | chr8 | 113960086 | 113960205 | RB1    | chr13 | 48954209  | 48954330  |

|        |      |           |           |         |       |           |           |        |       |          |          |
|--------|------|-----------|-----------|---------|-------|-----------|-----------|--------|-------|----------|----------|
| ARID1A | chr1 | 27106956  | 27107069  | CSMD3   | chr8  | 113966869 | 113966978 | RB1    | chr13 | 48955301 | 48955421 |
| ARID1A | chr1 | 27107068  | 27107181  | CSMD3   | chr8  | 113966964 | 113967053 | RB1    | chr13 | 48955410 | 48955525 |
| ARID1A | chr1 | 27107181  | 27107284  | CSMD3   | chr8  | 113988046 | 113988143 | RB1    | chr13 | 48955514 | 48955594 |
| ARID1B | chr6 | 157099152 | 157099269 | CSMD3   | chr8  | 113988132 | 113988257 | RB1    | chr13 | 49027102 | 49027198 |
| ARID1B | chr6 | 157099279 | 157099391 | CSMD3   | chr8  | 113988246 | 113988368 | RB1    | chr13 | 49027187 | 49027261 |
| ARID1B | chr6 | 157099393 | 157099518 | CSMD3   | chr8  | 113988357 | 113988468 | RB1    | chr13 | 49030324 | 49030440 |
| ARID1B | chr6 | 157099755 | 157099854 | CSMD3   | chr8  | 114031248 | 114031329 | RB1    | chr13 | 49030427 | 49030504 |
| ARID1B | chr6 | 157099842 | 157099942 | CSMD3   | chr8  | 114031318 | 114031436 | RB1    | chr13 | 49033732 | 49033845 |
| ARID1B | chr6 | 157100608 | 157100728 | CSMD3   | chr8  | 114110959 | 114111086 | RB1    | chr13 | 49033834 | 49033928 |
| ARID1B | chr6 | 157150309 | 157150399 | CSMD3   | chr8  | 114111075 | 114111173 | RB1    | chr13 | 49033917 | 49033991 |
| ARID1B | chr6 | 157150388 | 157150487 | CSMD3   | chr8  | 114185925 | 114186044 | RB1    | chr13 | 49037806 | 49037916 |
| ARID1B | chr6 | 157150469 | 157150585 | CSMD3   | chr8  | 114186040 | 114186150 | RB1    | chr13 | 49037898 | 49037965 |
| ARID1B | chr6 | 157192657 | 157192777 | CSMD3   | chr8  | 114186139 | 114186240 | RB1    | chr13 | 49039027 | 49039142 |
| ARID1B | chr6 | 157192766 | 157192894 | CSMD3   | chr8  | 114290800 | 114290918 | RB1    | chr13 | 49039140 | 49039220 |
| ARID1B | chr6 | 157222444 | 157222564 | CSMD3   | chr8  | 114290908 | 114291025 | RB1    | chr13 | 49039209 | 49039275 |
| ARID1B | chr6 | 157222554 | 157222686 | CSMD3   | chr8  | 114326780 | 114326897 | RB1    | chr13 | 49039301 | 49039408 |
| ARID1B | chr6 | 157222637 | 157222727 | CSMD3   | chr8  | 114326886 | 114326984 | RB1    | chr13 | 49039397 | 49039515 |
| ARID1B | chr6 | 157256528 | 157256650 | CSMD3   | chr8  | 114326973 | 114327089 | RB1    | chr13 | 49047382 | 49047501 |
| ARID1B | chr6 | 157256635 | 157256704 | CSMD3   | chr8  | 114388871 | 114388989 | RB1    | chr13 | 49047511 | 49047583 |
| ARID1B | chr6 | 157405702 | 157405830 | CSMD3   | chr8  | 114388978 | 114389082 | RB1    | chr13 | 49050800 | 49050910 |
| ARID1B | chr6 | 157405819 | 157405934 | CSMD3   | chr8  | 114448856 | 114448967 | RB1    | chr13 | 49050903 | 49051028 |
| ARID1B | chr6 | 157405993 | 157406080 | CSMD3   | chr8  | 114448956 | 114449065 | RB1    | chr13 | 49051420 | 49051523 |
| ARID1B | chr6 | 157406060 | 157406147 | CSMD3   | chr8  | 114449054 | 114449164 | RB1    | chr13 | 49051514 | 49051614 |
| ARID1B | chr6 | 157431547 | 157431677 | DSCAML1 | chr11 | 117298987 | 117299112 | RB1    | chr13 | 49054107 | 49054232 |
| ARID1B | chr6 | 157431658 | 157431748 | DSCAML1 | chr11 | 117299301 | 117299408 | RICTOR | chr5  | 38942337 | 38942464 |
| ARID1B | chr6 | 157454099 | 157454182 | DSCAML1 | chr11 | 117299403 | 117299529 | RICTOR | chr5  | 38942453 | 38942583 |
| ARID1B | chr6 | 157454171 | 157454288 | DSCAML1 | chr11 | 117301363 | 117301498 | RICTOR | chr5  | 38942875 | 38942963 |
| ARID1B | chr6 | 157454277 | 157454359 | DSCAML1 | chr11 | 117301478 | 117301590 | RICTOR | chr5  | 38942952 | 38943047 |
| ARID1B | chr6 | 157454348 | 157454432 | DSCAML1 | chr11 | 117301579 | 117301700 | RICTOR | chr5  | 38943036 | 38943156 |
| ARID1B | chr6 | 157469605 | 157469728 | DSCAML1 | chr11 | 117301682 | 117301787 | RICTOR | chr5  | 38944435 | 38944558 |
| ARID1B | chr6 | 157469717 | 157469843 | DSCAML1 | chr11 | 117302178 | 117302287 | RICTOR | chr5  | 38944550 | 38944659 |
| ARID1B | chr6 | 157469842 | 157469960 | DSCAML1 | chr11 | 117302284 | 117302414 | RICTOR | chr5  | 38944648 | 38944752 |
| ARID1B | chr6 | 157469949 | 157470068 | DSCAML1 | chr11 | 117302400 | 117302507 | RICTOR | chr5  | 38944912 | 38945028 |
| ARID1B | chr6 | 157470029 | 157470151 | DSCAML1 | chr11 | 117302953 | 117303081 | RICTOR | chr5  | 38945017 | 38945124 |
| ARID1B | chr6 | 157488024 | 157488141 | DSCAML1 | chr11 | 117303075 | 117303177 | RICTOR | chr5  | 38945113 | 38945220 |
| ARID1B | chr6 | 157488130 | 157488254 | DSCAML1 | chr11 | 117303154 | 117303265 | RICTOR | chr5  | 38945505 | 38945602 |
| ARID1B | chr6 | 157488249 | 157488369 | DSCAML1 | chr11 | 117303838 | 117303948 | RICTOR | chr5  | 38945591 | 38945711 |
| ARID1B | chr6 | 157495070 | 157495197 | DSCAML1 | chr11 | 117303921 | 117304031 | RICTOR | chr5  | 38945700 | 38945818 |
| ARID1B | chr6 | 157495186 | 157495303 | DSCAML1 | chr11 | 117304053 | 117304162 | RICTOR | chr5  | 38945817 | 38945920 |
| ARID1B | chr6 | 157502007 | 157502127 | DSCAML1 | chr11 | 117304151 | 117304227 | RICTOR | chr5  | 38946479 | 38946575 |

|        |      |           |           |         |       |           |           |        |      |          |          |
|--------|------|-----------|-----------|---------|-------|-----------|-----------|--------|------|----------|----------|
| ARID1B | chr6 | 157502109 | 157502191 | DSCAML1 | chr11 | 117306270 | 117306377 | RICTOR | chr5 | 38946564 | 38946670 |
| ARID1B | chr6 | 157502180 | 157502309 | DSCAML1 | chr11 | 117306352 | 117306481 | RICTOR | chr5 | 38946656 | 38946756 |
| ARID1B | chr6 | 157502298 | 157502398 | DSCAML1 | chr11 | 117306470 | 117306564 | RICTOR | chr5 | 38947302 | 38947425 |
| ARID1B | chr6 | 157505223 | 157505338 | DSCAML1 | chr11 | 117307815 | 117307935 | RICTOR | chr5 | 38947414 | 38947513 |
| ARID1B | chr6 | 157505327 | 157505436 | DSCAML1 | chr11 | 117307877 | 117308006 | RICTOR | chr5 | 38947491 | 38947558 |
| ARID1B | chr6 | 157505422 | 157505511 | DSCAML1 | chr11 | 117308032 | 117308141 | RICTOR | chr5 | 38949336 | 38949451 |
| ARID1B | chr6 | 157505495 | 157505626 | DSCAML1 | chr11 | 117308490 | 117308623 | RICTOR | chr5 | 38949445 | 38949557 |
| ARID1B | chr6 | 157510636 | 157510743 | DSCAML1 | chr11 | 117308639 | 117308735 | RICTOR | chr5 | 38949546 | 38949634 |
| ARID1B | chr6 | 157510732 | 157510824 | DSCAML1 | chr11 | 117308723 | 117308808 | RICTOR | chr5 | 38949729 | 38949835 |
| ARID1B | chr6 | 157510796 | 157510920 | DSCAML1 | chr11 | 117308791 | 117308901 | RICTOR | chr5 | 38949824 | 38949943 |
| ARID1B | chr6 | 157510909 | 157510983 | DSCAML1 | chr11 | 117309526 | 117309653 | RICTOR | chr5 | 38949932 | 38950055 |
| ARID1B | chr6 | 157511103 | 157511229 | DSCAML1 | chr11 | 117309928 | 117310041 | RICTOR | chr5 | 38950044 | 38950167 |
| ARID1B | chr6 | 157511218 | 157511332 | DSCAML1 | chr11 | 117310017 | 117310113 | RICTOR | chr5 | 38950156 | 38950278 |
| ARID1B | chr6 | 157511321 | 157511402 | DSCAML1 | chr11 | 117310102 | 117310213 | RICTOR | chr5 | 38950267 | 38950386 |
| ARID1B | chr6 | 157517235 | 157517351 | DSCAML1 | chr11 | 117310484 | 117310593 | RICTOR | chr5 | 38950375 | 38950475 |
| ARID1B | chr6 | 157517339 | 157517417 | DSCAML1 | chr11 | 117310582 | 117310695 | RICTOR | chr5 | 38950456 | 38950571 |
| ARID1B | chr6 | 157517399 | 157517472 | DSCAML1 | chr11 | 117314567 | 117314697 | RICTOR | chr5 | 38950560 | 38950671 |
| ARID1B | chr6 | 157517461 | 157517561 | DSCAML1 | chr11 | 117314686 | 117314769 | RICTOR | chr5 | 38950661 | 38950776 |
| ARID1B | chr6 | 157519845 | 157519952 | DSCAML1 | chr11 | 117321219 | 117321340 | RICTOR | chr5 | 38950765 | 38950875 |
| ARID1B | chr6 | 157519948 | 157520071 | DSCAML1 | chr11 | 117321314 | 117321422 | RICTOR | chr5 | 38952181 | 38952300 |
| ARID1B | chr6 | 157521727 | 157521819 | DSCAML1 | chr11 | 117329356 | 117329489 | RICTOR | chr5 | 38952291 | 38952390 |
| ARID1B | chr6 | 157521808 | 157521929 | DSCAML1 | chr11 | 117329488 | 117329598 | RICTOR | chr5 | 38952379 | 38952500 |
| ARID1B | chr6 | 157521918 | 157522037 | DSCAML1 | chr11 | 117329617 | 117329708 | RICTOR | chr5 | 38952491 | 38952606 |
| ARID1B | chr6 | 157522023 | 157522134 | DSCAML1 | chr11 | 117332094 | 117332175 | RICTOR | chr5 | 38953000 | 38953069 |
| ARID1B | chr6 | 157522123 | 157522242 | DSCAML1 | chr11 | 117332164 | 117332262 | RICTOR | chr5 | 38953058 | 38953136 |
| ARID1B | chr6 | 157522231 | 157522360 | DSCAML1 | chr11 | 117332255 | 117332354 | RICTOR | chr5 | 38953125 | 38953243 |
| ARID1B | chr6 | 157522299 | 157522425 | DSCAML1 | chr11 | 117335630 | 117335758 | RICTOR | chr5 | 38953407 | 38953520 |
| ARID1B | chr6 | 157522448 | 157522566 | DSCAML1 | chr11 | 117335755 | 117335834 | RICTOR | chr5 | 38953551 | 38953629 |
| ARID1B | chr6 | 157522555 | 157522677 | DSCAML1 | chr11 | 117335817 | 117335922 | RICTOR | chr5 | 38953618 | 38953715 |
| ARID1B | chr6 | 157524866 | 157524990 | DSCAML1 | chr11 | 117340496 | 117340622 | RICTOR | chr5 | 38954821 | 38954941 |
| ARID1B | chr6 | 157524979 | 157525089 | DSCAML1 | chr11 | 117340622 | 117340714 | RICTOR | chr5 | 38954960 | 38955083 |
| ARID1B | chr6 | 157525078 | 157525183 | DSCAML1 | chr11 | 117342523 | 117342656 | RICTOR | chr5 | 38955592 | 38955719 |
| ARID1B | chr6 | 157527223 | 157527336 | DSCAML1 | chr11 | 117342649 | 117342762 | RICTOR | chr5 | 38955708 | 38955825 |
| ARID1B | chr6 | 157527325 | 157527449 | DSCAML1 | chr11 | 117351063 | 117351201 | RICTOR | chr5 | 38955793 | 38955864 |
| ARID1B | chr6 | 157527433 | 157527523 | DSCAML1 | chr11 | 117351263 | 117351358 | RICTOR | chr5 | 38957621 | 38957735 |
| ARID1B | chr6 | 157527512 | 157527631 | DSCAML1 | chr11 | 117351829 | 117351924 | RICTOR | chr5 | 38957724 | 38957818 |
| ARID1B | chr6 | 157527626 | 157527707 | DSCAML1 | chr11 | 117351911 | 117352010 | RICTOR | chr5 | 38957807 | 38957920 |
| ARID1B | chr6 | 157527694 | 157527820 | DSCAML1 | chr11 | 117352617 | 117352706 | RICTOR | chr5 | 38958464 | 38958582 |
| ARID1B | chr6 | 157527801 | 157527899 | DSCAML1 | chr11 | 117352691 | 117352806 | RICTOR | chr5 | 38958571 | 38958651 |
| ARID1B | chr6 | 157527888 | 157528004 | DSCAML1 | chr11 | 117352787 | 117352903 | RICTOR | chr5 | 38958637 | 38958752 |

|        |      |           |           |         |       |           |           |        |      |          |          |
|--------|------|-----------|-----------|---------|-------|-----------|-----------|--------|------|----------|----------|
| ARID1B | chr6 | 157527993 | 157528099 | DSCAML1 | chr11 | 117374442 | 117374573 | RICTOR | chr5 | 38958795 | 38958920 |
| ARID1B | chr6 | 157528077 | 157528155 | DSCAML1 | chr11 | 117374565 | 117374657 | RICTOR | chr5 | 38958918 | 38958983 |
| ARID1B | chr6 | 157528144 | 157528252 | DSCAML1 | chr11 | 117374646 | 117374750 | RICTOR | chr5 | 38959165 | 38959275 |
| ARID1B | chr6 | 157528241 | 157528327 | DSCAML1 | chr11 | 117375620 | 117375728 | RICTOR | chr5 | 38959261 | 38959331 |
| ARID1B | chr6 | 157528358 | 157528462 | DSCAML1 | chr11 | 117375717 | 117375803 | RICTOR | chr5 | 38959377 | 38959492 |
| ARID1B | chr6 | 157528430 | 157528555 | DSCAML1 | chr11 | 117376099 | 117376220 | RICTOR | chr5 | 38959735 | 38959846 |
| ARID1B | chr6 | 157528544 | 157528673 | DSCAML1 | chr11 | 117376180 | 117376314 | RICTOR | chr5 | 38959872 | 38959951 |
| ARID1B | chr6 | 157528662 | 157528748 | DSCAML1 | chr11 | 117376303 | 117376418 | RICTOR | chr5 | 38959940 | 38960019 |
| ARID1B | chr6 | 157528738 | 157528837 | DSCAML1 | chr11 | 117376406 | 117376537 | RICTOR | chr5 | 38960008 | 38960094 |
| ARID1B | chr6 | 157528864 | 157528967 | DSCAML1 | chr11 | 117387097 | 117387227 | RICTOR | chr5 | 38960083 | 38960189 |
| ARID1B | chr6 | 157528956 | 157529075 | DSCAML1 | chr11 | 117387200 | 117387295 | RICTOR | chr5 | 38960397 | 38960515 |
| ARID1B | chr6 | 157099035 | 157099138 | DSCAML1 | chr11 | 117387283 | 117387414 | RICTOR | chr5 | 38960504 | 38960621 |
| ARID1B | chr6 | 157099141 | 157099271 | DSCAML1 | chr11 | 117387403 | 117387537 | RICTOR | chr5 | 38960610 | 38960712 |
| ARID1B | chr6 | 157099271 | 157099381 | DSCAML1 | chr11 | 117389077 | 117389199 | RICTOR | chr5 | 38962313 | 38962415 |
| ARID1B | chr6 | 157099396 | 157099519 | DSCAML1 | chr11 | 117389185 | 117389305 | RICTOR | chr5 | 38962433 | 38962543 |
| ARID1B | chr6 | 157099827 | 157099954 | DSCAML1 | chr11 | 117389292 | 117389402 | RICTOR | chr5 | 38962475 | 38962589 |
| ARID1B | chr6 | 157100495 | 157100587 | DSCAML1 | chr11 | 117389361 | 117389449 | RICTOR | chr5 | 38962658 | 38962762 |
| ARID1B | chr6 | 157100501 | 157100596 | DSCAML1 | chr11 | 117389449 | 117389558 | RICTOR | chr5 | 38962876 | 38962995 |
| ARID1B | chr6 | 157150339 | 157150413 | DSCAML1 | chr11 | 117391757 | 117391892 | RICTOR | chr5 | 38962984 | 38963103 |
| ARID1B | chr6 | 157150409 | 157150501 | DSCAML1 | chr11 | 117391871 | 117391969 | RICTOR | chr5 | 38963092 | 38963206 |
| ARID1B | chr6 | 157150493 | 157150608 | DSCAML1 | chr11 | 117391956 | 117392073 | RICTOR | chr5 | 38964796 | 38964908 |
| ARID1B | chr6 | 157192763 | 157192882 | DSCAML1 | chr11 | 117392063 | 117392158 | RICTOR | chr5 | 38964897 | 38964965 |
| ARID1B | chr6 | 157222490 | 157222615 | DSCAML1 | chr11 | 117395412 | 117395545 | RICTOR | chr5 | 38964954 | 38965044 |
| ARID1B | chr6 | 157222584 | 157222688 | DSCAML1 | chr11 | 117395534 | 117395634 | RICTOR | chr5 | 38966668 | 38966760 |
| ARID1B | chr6 | 157256562 | 157256650 | DSCAML1 | chr11 | 117395621 | 117395756 | RICTOR | chr5 | 38966749 | 38966817 |
| ARID1B | chr6 | 157256635 | 157256707 | DSCAML1 | chr11 | 117395775 | 117395907 | RICTOR | chr5 | 38967212 | 38967311 |
| ARID1B | chr6 | 157256709 | 157256820 | DSCAML1 | chr11 | 117402958 | 117403087 | RICTOR | chr5 | 38967307 | 38967422 |
| ARID1B | chr6 | 157405699 | 157405827 | DSCAML1 | chr11 | 117403106 | 117403236 | RICTOR | chr5 | 38967400 | 38967482 |
| ARID1B | chr6 | 157405821 | 157405935 | DSCAML1 | chr11 | 117403205 | 117403299 | RICTOR | chr5 | 38967471 | 38967579 |
| ARID1B | chr6 | 157405927 | 157406014 | DSCAML1 | chr11 | 117647412 | 117647533 | RICTOR | chr5 | 38967938 | 38968057 |
| ARID1B | chr6 | 157406012 | 157406088 | DSCAML1 | chr11 | 117647522 | 117647634 | RICTOR | chr5 | 38968046 | 38968130 |
| ARID1B | chr6 | 157431587 | 157431712 | DSCAML1 | chr11 | 117647623 | 117647713 | RICTOR | chr5 | 38968133 | 38968246 |
| ARID1B | chr6 | 157454100 | 157454221 | DSCAML1 | chr11 | 117651157 | 117651285 | RICTOR | chr5 | 38971902 | 38972022 |
| ARID1B | chr6 | 157454221 | 157454346 | DSCAML1 | chr11 | 117651274 | 117651389 | RICTOR | chr5 | 38975562 | 38975660 |
| ARID1B | chr6 | 157469717 | 157469842 | DSCAML1 | chr11 | 117651378 | 117651492 | RICTOR | chr5 | 38975649 | 38975764 |
| ARID1B | chr6 | 157469842 | 157469936 | DSCAML1 | chr11 | 117651489 | 117651565 | RICTOR | chr5 | 38978606 | 38978713 |
| ARID1B | chr6 | 157469936 | 157470024 | DSCAML1 | chr11 | 117667771 | 117667900 | RICTOR | chr5 | 38978702 | 38978802 |
| ARID1B | chr6 | 157470024 | 157470113 | EIF1AX  | chrX  | 20146374  | 20146478  | RICTOR | chr5 | 38981887 | 38982006 |
| ARID1B | chr6 | 157488130 | 157488246 | EIF1AX  | chrX  | 20148593  | 20148706  | RICTOR | chr5 | 38981995 | 38982091 |
| ARID1B | chr6 | 157488246 | 157488378 | EIF1AX  | chrX  | 20148634  | 20148751  | RICTOR | chr5 | 38982080 | 38982198 |

|        |      |           |           |        |      |          |          |        |      |          |          |
|--------|------|-----------|-----------|--------|------|----------|----------|--------|------|----------|----------|
| ARID1B | chr6 | 157495046 | 157495167 | EIF1AX | chrX | 20150246 | 20150364 | RICTOR | chr5 | 38991051 | 38991123 |
| ARID1B | chr6 | 157495167 | 157495294 | EIF1AX | chrX | 20150353 | 20150446 | RICTOR | chr5 | 38991112 | 38991227 |
| ARID1B | chr6 | 157502091 | 157502194 | EIF1AX | chrX | 20152043 | 20152162 | RICTOR | chr5 | 38996904 | 38996969 |
| ARID1B | chr6 | 157502194 | 157502322 | EIF1AX | chrX | 20153754 | 20153872 | RICTOR | chr5 | 38996958 | 38997048 |
| ARID1B | chr6 | 157505356 | 157505482 | EIF1AX | chrX | 20153861 | 20153969 | RICTOR | chr5 | 39002585 | 39002687 |
| ARID1B | chr6 | 157505476 | 157505586 | EIF1AX | chrX | 20156660 | 20156726 | RICTOR | chr5 | 39002676 | 39002759 |
| ARID1B | chr6 | 157510731 | 157510837 | EIF1AX | chrX | 20159681 | 20159787 | RICTOR | chr5 | 39002748 | 39002831 |
| ARID1B | chr6 | 157510833 | 157510920 | KAT6A  | chr8 | 41789664 | 41789770 | RICTOR | chr5 | 39003588 | 39003674 |
| ARID1B | chr6 | 157511101 | 157511208 | KAT6A  | chr8 | 41789752 | 41789833 | RICTOR | chr5 | 39003663 | 39003743 |
| ARID1B | chr6 | 157511208 | 157511324 | KAT6A  | chr8 | 41789818 | 41789931 | RICTOR | chr5 | 39003732 | 39003849 |
| ARID1B | chr6 | 157511322 | 157511402 | KAT6A  | chr8 | 41789927 | 41790041 | RICTOR | chr5 | 39021018 | 39021138 |
| ARID1B | chr6 | 157517243 | 157517369 | KAT6A  | chr8 | 41790038 | 41790154 | RICTOR | chr5 | 39021095 | 39021207 |
| ARID1B | chr6 | 157517369 | 157517474 | KAT6A  | chr8 | 41790118 | 41790248 | RICTOR | chr5 | 39021196 | 39021302 |
| ARID1B | chr6 | 157519854 | 157519965 | KAT6A  | chr8 | 41790247 | 41790376 | RICTOR | chr5 | 39074501 | 39074634 |
| ARID1B | chr6 | 157519965 | 157520080 | KAT6A  | chr8 | 41790376 | 41790492 | SDHA   | chr5 | 223451   | 223570   |
| ARID1B | chr6 | 157521818 | 157521923 | KAT6A  | chr8 | 41790491 | 41790619 | SDHA   | chr5 | 223559   | 223649   |
| ARID1B | chr6 | 157521909 | 157522005 | KAT6A  | chr8 | 41790803 | 41790941 | SDHA   | chr5 | 223638   | 223735   |
| ARID1B | chr6 | 157522004 | 157522125 | KAT6A  | chr8 | 41790931 | 41791040 | SDHA   | chr5 | 224388   | 224494   |
| ARID1B | chr6 | 157522123 | 157522223 | KAT6A  | chr8 | 41791036 | 41791127 | SDHA   | chr5 | 224483   | 224608   |
| ARID1B | chr6 | 157522209 | 157522310 | KAT6A  | chr8 | 41791124 | 41791210 | SDHA   | chr5 | 224612   | 224739   |
| ARID1B | chr6 | 157522310 | 157522431 | KAT6A  | chr8 | 41791206 | 41791328 | SDHA   | chr5 | 225434   | 225524   |
| ARID1B | chr6 | 157522431 | 157522550 | KAT6A  | chr8 | 41791328 | 41791443 | SDHA   | chr5 | 225513   | 225630   |
| ARID1B | chr6 | 157522550 | 157522642 | KAT6A  | chr8 | 41791443 | 41791570 | SDHA   | chr5 | 225604   | 225709   |
| ARID1B | chr6 | 157524964 | 157525040 | KAT6A  | chr8 | 41791564 | 41791683 | SDHA   | chr5 | 225871   | 225983   |
| ARID1B | chr6 | 157525040 | 157525148 | KAT6A  | chr8 | 41791679 | 41791806 | SDHA   | chr5 | 225972   | 226056   |
| ARID1B | chr6 | 157527243 | 157527363 | KAT6A  | chr8 | 41791806 | 41791939 | SDHA   | chr5 | 226054   | 226183   |
| ARID1B | chr6 | 157527355 | 157527469 | KAT6A  | chr8 | 41791820 | 41791954 | SDHA   | chr5 | 226159   | 226264   |
| ARID1B | chr6 | 157527468 | 157527592 | KAT6A  | chr8 | 41791947 | 41792072 | SDHA   | chr5 | 228199   | 228320   |
| ARID1B | chr6 | 157527571 | 157527660 | KAT6A  | chr8 | 41792010 | 41792139 | SDHA   | chr5 | 228309   | 228410   |
| ARID1B | chr6 | 157527655 | 157527772 | KAT6A  | chr8 | 41792139 | 41792229 | SDHA   | chr5 | 228398   | 228516   |
| ARID1B | chr6 | 157527772 | 157527900 | KAT6A  | chr8 | 41792229 | 41792326 | SDHA   | chr5 | 230895   | 231002   |
| ARID1B | chr6 | 157527900 | 157528016 | KAT6A  | chr8 | 41792326 | 41792434 | SDHA   | chr5 | 230953   | 231072   |
| ARID1B | chr6 | 157528011 | 157528141 | KAT6A  | chr8 | 41794759 | 41794847 | SDHA   | chr5 | 231107   | 231177   |
| ARID1B | chr6 | 157528141 | 157528262 | KAT6A  | chr8 | 41794847 | 41794929 | SDHA   | chr5 | 233502   | 233615   |
| ARID1B | chr6 | 157528262 | 157528393 | KAT6A  | chr8 | 41794929 | 41795013 | SDHA   | chr5 | 233605   | 233709   |
| ARID1B | chr6 | 157528393 | 157528518 | KAT6A  | chr8 | 41795009 | 41795102 | SDHA   | chr5 | 233686   | 233809   |
| ARID1B | chr6 | 157528518 | 157528636 | KAT6A  | chr8 | 41798300 | 41798377 | SDHA   | chr5 | 233791   | 233896   |
| ARID1B | chr6 | 157528635 | 157528746 | KAT6A  | chr8 | 41798370 | 41798492 | SDHA   | chr5 | 235206   | 235334   |
| ARID1B | chr6 | 157528746 | 157528872 | KAT6A  | chr8 | 41798486 | 41798585 | SDHA   | chr5 | 235295   | 235405   |
| ARID1B | chr6 | 157528865 | 157528990 | KAT6A  | chr8 | 41798585 | 41798711 | SDHA   | chr5 | 235394   | 235510   |



|        |       |           |           |       |       |          |          |       |       |          |          |
|--------|-------|-----------|-----------|-------|-------|----------|----------|-------|-------|----------|----------|
| ARID1B | chr6  | 157528990 | 157529082 | KAT6A | chr8  | 41798709 | 41798826 | SDHA  | chr5  | 236456   | 236563   |
| ARID2  | chr12 | 46123587  | 46123706  | KAT6A | chr8  | 41798826 | 41798941 | SDHA  | chr5  | 236561   | 236686   |
| ARID2  | chr12 | 46123685  | 46123820  | KAT6A | chr8  | 41798910 | 41799020 | SDHA  | chr5  | 236675   | 236781   |
| ARID2  | chr12 | 46123829  | 46123914  | KAT6A | chr8  | 41800315 | 41800441 | SDHA  | chr5  | 240397   | 240506   |
| ARID2  | chr12 | 46123903  | 46124025  | KAT6A | chr8  | 41800441 | 41800565 | SDHA  | chr5  | 240495   | 240575   |
| ARID2  | chr12 | 46124871  | 46124991  | KAT6A | chr8  | 41801269 | 41801346 | SDHA  | chr5  | 240564   | 240687   |
| ARID2  | chr12 | 46124980  | 46125057  | KAT6A | chr8  | 41801346 | 41801436 | SDHA  | chr5  | 251056   | 251179   |
| ARID2  | chr12 | 46125046  | 46125152  | KAT6A | chr8  | 41801434 | 41801516 | SDHA  | chr5  | 251168   | 251289   |
| ARID2  | chr12 | 46205144  | 46205238  | KAT6A | chr8  | 41804077 | 41804202 | SDHA  | chr5  | 251359   | 251490   |
| ARID2  | chr12 | 46205227  | 46205298  | KAT6A | chr8  | 41805201 | 41805326 | SDHA  | chr5  | 251449   | 251562   |
| ARID2  | chr12 | 46205287  | 46205385  | KAT6A | chr8  | 41805325 | 41805446 | SDHA  | chr5  | 251538   | 251649   |
| ARID2  | chr12 | 46211393  | 46211476  | KAT6A | chr8  | 41806708 | 41806791 | SDHA  | chr5  | 254403   | 254511   |
| ARID2  | chr12 | 46211475  | 46211563  | KAT6A | chr8  | 41806789 | 41806872 | SDHA  | chr5  | 254500   | 254596   |
| ARID2  | chr12 | 46211552  | 46211630  | KAT6A | chr8  | 41812803 | 41812885 | SDHA  | chr5  | 254585   | 254712   |
| ARID2  | chr12 | 46211619  | 46211724  | KAT6A | chr8  | 41812863 | 41812960 | SDHA  | chr5  | 256360   | 256479   |
| ARID2  | chr12 | 46215132  | 46215235  | KAT6A | chr8  | 41832163 | 41832258 | SDHA  | chr5  | 256468   | 256587   |
| ARID2  | chr12 | 46215224  | 46215291  | KAT6A | chr8  | 41832253 | 41832353 | SMAD4 | chr18 | 48575099 | 48575213 |
| ARID2  | chr12 | 46230307  | 46230409  | KAT6A | chr8  | 41834488 | 41834570 | SMAD4 | chr18 | 48575556 | 48575677 |
| ARID2  | chr12 | 46230398  | 46230513  | KAT6A | chr8  | 41834570 | 41834670 | SMAD4 | chr18 | 48581190 | 48581302 |
| ARID2  | chr12 | 46230544  | 46230612  | KAT6A | chr8  | 41834669 | 41834751 | SMAD4 | chr18 | 48584551 | 48584678 |
| ARID2  | chr12 | 46230601  | 46230724  | KAT6A | chr8  | 41834751 | 41834824 | SMAD4 | chr18 | 48586251 | 48586361 |
| ARID2  | chr12 | 46230713  | 46230830  | KAT6A | chr8  | 41836141 | 41836262 | SMAD4 | chr18 | 48591814 | 48591931 |
| ARID2  | chr12 | 46231022  | 46231096  | KAT6A | chr8  | 41836246 | 41836324 | SMAD4 | chr18 | 48593399 | 48593519 |
| ARID2  | chr12 | 46231085  | 46231191  | KAT6A | chr8  | 41838327 | 41838403 | SMAD4 | chr18 | 48603028 | 48603119 |
| ARID2  | chr12 | 46231180  | 46231264  | KAT6A | chr8  | 41838403 | 41838483 | SMAD4 | chr18 | 48604658 | 48604774 |
| ARID2  | chr12 | 46231318  | 46231394  | KAT6A | chr8  | 41839349 | 41839467 | SRC   | chr20 | 36012464 | 36012574 |
| ARID2  | chr12 | 46231383  | 46231476  | KAT6A | chr8  | 41844947 | 41845075 | SRC   | chr20 | 36014396 | 36014525 |
| ARID2  | chr12 | 46231465  | 46231587  | KAT6A | chr8  | 41905883 | 41906008 | SRC   | chr20 | 36014513 | 36014641 |
| ARID2  | chr12 | 46233052  | 46233158  | KAT6A | chr8  | 41906008 | 41906124 | SRC   | chr20 | 36022231 | 36022331 |
| ARID2  | chr12 | 46233147  | 46233212  | KAT6A | chr8  | 41906124 | 41906247 | SRC   | chr20 | 36022272 | 36022401 |
| ARID2  | chr12 | 46233201  | 46233282  | KAT6A | chr8  | 41906247 | 41906349 | SRC   | chr20 | 36022400 | 36022498 |
| ARID2  | chr12 | 46233271  | 46233376  | KAT6A | chr8  | 41906349 | 41906441 | SRC   | chr20 | 36022523 | 36022615 |
| ARID2  | chr12 | 46240555  | 46240665  | KAT6A | chr8  | 41906441 | 41906515 | SRC   | chr20 | 36022601 | 36022700 |
| ARID2  | chr12 | 46240654  | 46240740  | KAT6B | chr10 | 76602521 | 76602622 | SRC   | chr20 | 36022684 | 36022796 |
| ARID2  | chr12 | 46240729  | 46240848  | KAT6B | chr10 | 76602622 | 76602735 | SRC   | chr20 | 36024482 | 36024608 |
| ARID2  | chr12 | 46242554  | 46242674  | KAT6B | chr10 | 76602735 | 76602864 | SRC   | chr20 | 36024597 | 36024703 |
| ARID2  | chr12 | 46242663  | 46242777  | KAT6B | chr10 | 76602864 | 76602984 | SRC   | chr20 | 36024685 | 36024779 |
| ARID2  | chr12 | 46242766  | 46242851  | KAT6B | chr10 | 76602983 | 76603111 | SRC   | chr20 | 36026038 | 36026174 |
| ARID2  | chr12 | 46243297  | 46243418  | KAT6B | chr10 | 76603111 | 76603237 | SRC   | chr20 | 36026112 | 36026234 |
| ARID2  | chr12 | 46243406  | 46243532  | KAT6B | chr10 | 76719737 | 76719819 | SRC   | chr20 | 36026208 | 36026337 |

|       |       |          |          |       |       |          |          |      |       |          |          |
|-------|-------|----------|----------|-------|-------|----------|----------|------|-------|----------|----------|
| ARID2 | chr12 | 46243521 | 46243639 | KAT6B | chr10 | 76719765 | 76719868 | SRC  | chr20 | 36028403 | 36028512 |
| ARID2 | chr12 | 46243681 | 46243798 | KAT6B | chr10 | 76729394 | 76729485 | SRC  | chr20 | 36028478 | 36028603 |
| ARID2 | chr12 | 46243787 | 46243862 | KAT6B | chr10 | 76729450 | 76729568 | SRC  | chr20 | 36028560 | 36028666 |
| ARID2 | chr12 | 46243851 | 46243974 | KAT6B | chr10 | 76729740 | 76729838 | SRC  | chr20 | 36028655 | 36028753 |
| ARID2 | chr12 | 46243963 | 46244079 | KAT6B | chr10 | 76729837 | 76729923 | SRC  | chr20 | 36029906 | 36030033 |
| ARID2 | chr12 | 46244068 | 46244164 | KAT6B | chr10 | 76732177 | 76732300 | SRC  | chr20 | 36030022 | 36030134 |
| ARID2 | chr12 | 46244153 | 46244272 | KAT6B | chr10 | 76732286 | 76732384 | SRC  | chr20 | 36030732 | 36030865 |
| ARID2 | chr12 | 46244261 | 46244385 | KAT6B | chr10 | 76732380 | 76732455 | SRC  | chr20 | 36030852 | 36030953 |
| ARID2 | chr12 | 46244374 | 46244492 | KAT6B | chr10 | 76735158 | 76735231 | SRC  | chr20 | 36030935 | 36031059 |
| ARID2 | chr12 | 46244481 | 46244600 | KAT6B | chr10 | 76735187 | 76735285 | SRC  | chr20 | 36031082 | 36031178 |
| ARID2 | chr12 | 46244589 | 46244701 | KAT6B | chr10 | 76735285 | 76735374 | SRC  | chr20 | 36031162 | 36031276 |
| ARID2 | chr12 | 46244690 | 46244807 | KAT6B | chr10 | 76735374 | 76735461 | SRC  | chr20 | 36031264 | 36031376 |
| ARID2 | chr12 | 46244796 | 46244924 | KAT6B | chr10 | 76735461 | 76735542 | SRC  | chr20 | 36031425 | 36031558 |
| ARID2 | chr12 | 46244922 | 46245004 | KAT6B | chr10 | 76735542 | 76735652 | SRC  | chr20 | 36031543 | 36031643 |
| ARID2 | chr12 | 46244993 | 46245078 | KAT6B | chr10 | 76735630 | 76735743 | SRC  | chr20 | 36031676 | 36031795 |
| ARID2 | chr12 | 46245053 | 46245168 | KAT6B | chr10 | 76735743 | 76735845 | SRC  | chr20 | 36031788 | 36031912 |
| ARID2 | chr12 | 46245157 | 46245278 | KAT6B | chr10 | 76735845 | 76735961 | TERT | chr5  | 1253784  | 1253893  |
| ARID2 | chr12 | 46245267 | 46245352 | KAT6B | chr10 | 76735961 | 76736088 | TERT | chr5  | 1253869  | 1254000  |
| ARID2 | chr12 | 46245341 | 46245459 | KAT6B | chr10 | 76737009 | 76737123 | TERT | chr5  | 1254400  | 1254519  |
| ARID2 | chr12 | 46245448 | 46245571 | KAT6B | chr10 | 76737123 | 76737203 | TERT | chr5  | 1254519  | 1254629  |
| ARID2 | chr12 | 46245560 | 46245684 | KAT6B | chr10 | 76738934 | 76739045 | TERT | chr5  | 1255346  | 1255472  |
| ARID2 | chr12 | 46245673 | 46245786 | KAT6B | chr10 | 76739022 | 76739108 | TERT | chr5  | 1255471  | 1255555  |
| ARID2 | chr12 | 46245775 | 46245899 | KAT6B | chr10 | 76741566 | 76741666 | TERT | chr5  | 1258616  | 1258741  |
| ARID2 | chr12 | 46245888 | 46246001 | KAT6B | chr10 | 76741666 | 76741744 | TERT | chr5  | 1258741  | 1258848  |
| ARID2 | chr12 | 46245990 | 46246083 | KAT6B | chr10 | 76744795 | 76744879 | TERT | chr5  | 1260476  | 1260599  |
| ARID2 | chr12 | 46246072 | 46246193 | KAT6B | chr10 | 76744861 | 76744963 | TERT | chr5  | 1260599  | 1260683  |
| ARID2 | chr12 | 46246182 | 46246306 | KAT6B | chr10 | 76744941 | 76745051 | TERT | chr5  | 1260681  | 1260771  |
| ARID2 | chr12 | 46246295 | 46246399 | KAT6B | chr10 | 76748765 | 76748886 | TERT | chr5  | 1264409  | 1264538  |
| ARID2 | chr12 | 46246388 | 46246506 | KAT6B | chr10 | 76780306 | 76780424 | TERT | chr5  | 1264538  | 1264653  |
| ARID2 | chr12 | 46246495 | 46246625 | KAT6B | chr10 | 76780424 | 76780539 | TERT | chr5  | 1264653  | 1264761  |
| ARID2 | chr12 | 46246614 | 46246729 | KAT6B | chr10 | 76780535 | 76780653 | TERT | chr5  | 1266445  | 1266553  |
| ARID2 | chr12 | 46254563 | 46254644 | KAT6B | chr10 | 76780826 | 76780940 | TERT | chr5  | 1266539  | 1266624  |
| ARID2 | chr12 | 46254619 | 46254700 | KAT6B | chr10 | 76780940 | 76781028 | TERT | chr5  | 1266624  | 1266707  |
| ARID2 | chr12 | 46254689 | 46254810 | KAT6B | chr10 | 76781576 | 76781698 | TERT | chr5  | 1268546  | 1268670  |
| ARID2 | chr12 | 46285475 | 46285598 | KAT6B | chr10 | 76781698 | 76781803 | TERT | chr5  | 1268670  | 1268801  |
| ARID2 | chr12 | 46285587 | 46285677 | KAT6B | chr10 | 76781817 | 76781946 | TERT | chr5  | 1271229  | 1271323  |
| ARID2 | chr12 | 46285666 | 46285751 | KAT6B | chr10 | 76781831 | 76781956 | TERT | chr5  | 1271321  | 1271403  |
| ARID2 | chr12 | 46285811 | 46285929 | KAT6B | chr10 | 76784704 | 76784822 | TERT | chr5  | 1272239  | 1272371  |
| ARID2 | chr12 | 46287054 | 46287178 | KAT6B | chr10 | 76784822 | 76784925 | TERT | chr5  | 1272371  | 1272455  |
| ARID2 | chr12 | 46287167 | 46287290 | KAT6B | chr10 | 76784925 | 76785037 | TERT | chr5  | 1278699  | 1278828  |

|       |       |          |          |       |       |           |           |      |       |         |         |
|-------|-------|----------|----------|-------|-------|-----------|-----------|------|-------|---------|---------|
| ARID2 | chr12 | 46287279 | 46287400 | KAT6B | chr10 | 76788209  | 76788337  | TERT | chr5  | 1278827 | 1278962 |
| ARID2 | chr12 | 46287360 | 46287484 | KAT6B | chr10 | 76788337  | 76788463  | TERT | chr5  | 1279338 | 1279444 |
| ARID2 | chr12 | 46287473 | 46287585 | KAT6B | chr10 | 76788463  | 76788590  | TERT | chr5  | 1279424 | 1279549 |
| ARID2 | chr12 | 46298628 | 46298725 | KAT6B | chr10 | 76788590  | 76788716  | TERT | chr5  | 1279545 | 1279643 |
| ARID2 | chr12 | 46298708 | 46298813 | KAT6B | chr10 | 76788640  | 76788756  | TERT | chr5  | 1280210 | 1280312 |
| ARID2 | chr12 | 46298802 | 46298911 | KAT6B | chr10 | 76788755  | 76788870  | TERT | chr5  | 1280311 | 1280446 |
| ARID2 | chr12 | 46123588 | 46123691 | KAT6B | chr10 | 76788866  | 76788994  | TERT | chr5  | 1280446 | 1280536 |
| ARID2 | chr12 | 46123684 | 46123795 | KAT6B | chr10 | 76788987  | 76789116  | TERT | chr5  | 1282486 | 1282591 |
| ARID2 | chr12 | 46123803 | 46123889 | KAT6B | chr10 | 76789096  | 76789214  | TERT | chr5  | 1282591 | 1282683 |
| ARID2 | chr12 | 46123878 | 46123963 | KAT6B | chr10 | 76789207  | 76789340  | TERT | chr5  | 1282683 | 1282807 |
| ARID2 | chr12 | 46124981 | 46125072 | KAT6B | chr10 | 76789338  | 76789465  | TERT | chr5  | 1293371 | 1293486 |
| ARID2 | chr12 | 46125072 | 46125175 | KAT6B | chr10 | 76789460  | 76789582  | TERT | chr5  | 1293485 | 1293615 |
| ARID2 | chr12 | 46205142 | 46205267 | KAT6B | chr10 | 76789582  | 76789711  | TERT | chr5  | 1293626 | 1293722 |
| ARID2 | chr12 | 46205267 | 46205343 | KAT6B | chr10 | 76789708  | 76789842  | TERT | chr5  | 1293686 | 1293820 |
| ARID2 | chr12 | 46211392 | 46211510 | KAT6B | chr10 | 76789839  | 76789964  | TERT | chr5  | 1293814 | 1293912 |
| ARID2 | chr12 | 46211506 | 46211596 | KAT6B | chr10 | 76789964  | 76790059  | TERT | chr5  | 1293912 | 1294013 |
| ARID2 | chr12 | 46211594 | 46211663 | KAT6B | chr10 | 76790059  | 76790160  | TERT | chr5  | 1294010 | 1294143 |
| ARID2 | chr12 | 46215129 | 46215225 | KAT6B | chr10 | 76790159  | 76790283  | TERT | chr5  | 1294062 | 1294187 |
| ARID2 | chr12 | 46215229 | 46215305 | KAT6B | chr10 | 76790283  | 76790408  | TERT | chr5  | 1294186 | 1294306 |
| ARID2 | chr12 | 46230407 | 46230516 | KAT6B | chr10 | 76790408  | 76790541  | TERT | chr5  | 1294387 | 1294489 |
| ARID2 | chr12 | 46230423 | 46230545 | KAT6B | chr10 | 76790541  | 76790637  | TERT | chr5  | 1294413 | 1294550 |
| ARID2 | chr12 | 46230633 | 46230756 | KAT6B | chr10 | 76790637  | 76790758  | TERT | chr5  | 1294628 | 1294735 |
| ARID2 | chr12 | 46230756 | 46230832 | KAT6B | chr10 | 76790758  | 76790844  | TERT | chr5  | 1294629 | 1294767 |
| ARID2 | chr12 | 46231077 | 46231189 | KMT2A | chr11 | 118307486 | 118307621 | TP53 | chr17 | 7572831 | 7572936 |
| ARID2 | chr12 | 46231127 | 46231197 | KMT2A | chr11 | 118307530 | 118307660 | TP53 | chr17 | 7572937 | 7573040 |
| ARID2 | chr12 | 46231329 | 46231402 | KMT2A | chr11 | 118339430 | 118339560 | TP53 | chr17 | 7573863 | 7573967 |
| ARID2 | chr12 | 46231399 | 46231473 | KMT2A | chr11 | 118342300 | 118342403 | TP53 | chr17 | 7573944 | 7574041 |
| ARID2 | chr12 | 46231469 | 46231589 | KMT2A | chr11 | 118342399 | 118342477 | TP53 | chr17 | 7576605 | 7576690 |
| ARID2 | chr12 | 46233062 | 46233176 | KMT2A | chr11 | 118342475 | 118342578 | TP53 | chr17 | 7576837 | 7576950 |
| ARID2 | chr12 | 46233176 | 46233296 | KMT2A | chr11 | 118342578 | 118342695 | TP53 | chr17 | 7576958 | 7577064 |
| ARID2 | chr12 | 46240568 | 46240665 | KMT2A | chr11 | 118342684 | 118342790 | TP53 | chr17 | 7577065 | 7577165 |
| ARID2 | chr12 | 46240656 | 46240746 | KMT2A | chr11 | 118342788 | 118342916 | TP53 | chr17 | 7577487 | 7577618 |
| ARID2 | chr12 | 46242555 | 46242681 | KMT2A | chr11 | 118342907 | 118342991 | TP53 | chr17 | 7578142 | 7578234 |
| ARID2 | chr12 | 46242681 | 46242780 | KMT2A | chr11 | 118342991 | 118343087 | TP53 | chr17 | 7578235 | 7578362 |
| ARID2 | chr12 | 46243279 | 46243399 | KMT2A | chr11 | 118343087 | 118343170 | TP53 | chr17 | 7578305 | 7578432 |
| ARID2 | chr12 | 46243398 | 46243520 | KMT2A | chr11 | 118343170 | 118343291 | TP53 | chr17 | 7578433 | 7578564 |
| ARID2 | chr12 | 46243520 | 46243641 | KMT2A | chr11 | 118343291 | 118343401 | TP53 | chr17 | 7579279 | 7579385 |
| ARID2 | chr12 | 46243786 | 46243899 | KMT2A | chr11 | 118343401 | 118343536 | TP53 | chr17 | 7579386 | 7579502 |
| ARID2 | chr12 | 46243899 | 46244018 | KMT2A | chr11 | 118343507 | 118343619 | TP53 | chr17 | 7579503 | 7579588 |
| ARID2 | chr12 | 46244018 | 46244144 | KMT2A | chr11 | 118343619 | 118343739 | TP53 | chr17 | 7579570 | 7579698 |

|       |       |          |          |       |       |           |           |      |       |         |         |
|-------|-------|----------|----------|-------|-------|-----------|-----------|------|-------|---------|---------|
| ARID2 | chr12 | 46244144 | 46244226 | KMT2A | chr11 | 118343739 | 118343839 | TP53 | chr17 | 7579699 | 7579822 |
| ARID2 | chr12 | 46244226 | 46244350 | KMT2A | chr11 | 118343839 | 118343922 | TP53 | chr17 | 7579835 | 7579949 |
| ARID2 | chr12 | 46244350 | 46244467 | KMT2A | chr11 | 118343922 | 118344038 |      |       |         |         |
| ARID2 | chr12 | 46244467 | 46244562 | KMT2A | chr11 | 118344038 | 118344134 |      |       |         |         |
| ARID2 | chr12 | 46244562 | 46244690 | KMT2A | chr11 | 118344134 | 118344225 |      |       |         |         |
| ARID2 | chr12 | 46244690 | 46244793 | KMT2A | chr11 | 118344225 | 118344344 |      |       |         |         |
| ARID2 | chr12 | 46244793 | 46244898 | KMT2A | chr11 | 118344340 | 118344455 |      |       |         |         |
| ARID2 | chr12 | 46244898 | 46245025 | KMT2A | chr11 | 118344455 | 118344568 |      |       |         |         |
| ARID2 | chr12 | 46245025 | 46245139 | KMT2A | chr11 | 118344477 | 118344607 |      |       |         |         |
| ARID2 | chr12 | 46245139 | 46245266 | KMT2A | chr11 | 118344607 | 118344705 |      |       |         |         |
| ARID2 | chr12 | 46245266 | 46245389 | KMT2A | chr11 | 118344705 | 118344815 |      |       |         |         |
| ARID2 | chr12 | 46245389 | 46245508 | KMT2A | chr11 | 118344810 | 118344930 |      |       |         |         |
| ARID2 | chr12 | 46245508 | 46245626 | KMT2A | chr11 | 118344929 | 118345037 |      |       |         |         |
| ARID2 | chr12 | 46245626 | 46245720 | KMT2A | chr11 | 118347512 | 118347617 |      |       |         |         |
| ARID2 | chr12 | 46245718 | 46245814 | KMT2A | chr11 | 118347616 | 118347717 |      |       |         |         |
| ARID2 | chr12 | 46245814 | 46245923 | KMT2A | chr11 | 118348657 | 118348788 |      |       |         |         |
| ARID2 | chr12 | 46245922 | 46246044 | KMT2A | chr11 | 118348788 | 118348917 |      |       |         |         |
| ARID2 | chr12 | 46246032 | 46246117 | KMT2A | chr11 | 118350831 | 118350951 |      |       |         |         |
| ARID2 | chr12 | 46246117 | 46246197 | KMT2A | chr11 | 118350951 | 118351047 |      |       |         |         |
| ARID2 | chr12 | 46246197 | 46246292 | KMT2A | chr11 | 118352418 | 118352531 |      |       |         |         |
| ARID2 | chr12 | 46246292 | 46246403 | KMT2A | chr11 | 118352528 | 118352636 |      |       |         |         |
| ARID2 | chr12 | 46246403 | 46246509 | KMT2A | chr11 | 118352624 | 118352738 |      |       |         |         |
| ARID2 | chr12 | 46246508 | 46246611 | KMT2A | chr11 | 118352735 | 118352857 |      |       |         |         |
| ARID2 | chr12 | 46246611 | 46246687 | KMT2A | chr11 | 118353098 | 118353218 |      |       |         |         |
| ARID2 | chr12 | 46254567 | 46254645 | KMT2A | chr11 | 118354859 | 118354957 |      |       |         |         |
| ARID2 | chr12 | 46254642 | 46254717 | KMT2A | chr11 | 118354957 | 118355080 |      |       |         |         |
| ARID2 | chr12 | 46254707 | 46254774 | KMT2A | chr11 | 118355572 | 118355690 |      |       |         |         |
| ARID2 | chr12 | 46285552 | 46285621 | KMT2A | chr11 | 118359246 | 118359367 |      |       |         |         |
| ARID2 | chr12 | 46285621 | 46285733 | KMT2A | chr11 | 118359367 | 118359478 |      |       |         |         |
| ARID2 | chr12 | 46285673 | 46285805 | KMT2A | chr11 | 118360420 | 118360531 |      |       |         |         |
| ARID2 | chr12 | 46285805 | 46285922 | KMT2A | chr11 | 118360529 | 118360635 |      |       |         |         |
| ARID2 | chr12 | 46287142 | 46287245 | KMT2A | chr11 | 118360747 | 118360860 |      |       |         |         |
| ARID2 | chr12 | 46287245 | 46287332 | KMT2A | chr11 | 118360860 | 118360978 |      |       |         |         |
| ARID2 | chr12 | 46287352 | 46287475 | KMT2A | chr11 | 118361860 | 118361950 |      |       |         |         |
| ARID2 | chr12 | 46287467 | 46287578 | KMT2A | chr11 | 118361948 | 118362026 |      |       |         |         |
| ARID2 | chr12 | 46298693 | 46298780 | KMT2A | chr11 | 118362450 | 118362572 |      |       |         |         |
| ARID2 | chr12 | 46298772 | 46298888 | KMT2A | chr11 | 118362572 | 118362664 |      |       |         |         |
| ATRX  | chrX  | 76763770 | 76763879 | KMT2A | chr11 | 118363738 | 118363856 |      |       |         |         |
| ATRX  | chrX  | 76763876 | 76763960 | KMT2A | chr11 | 118363856 | 118363945 |      |       |         |         |
| ATRX  | chrX  | 76763960 | 76764047 | KMT2A | chr11 | 118364967 | 118365094 |      |       |         |         |

|      |      |          |          |       |       |           |           |
|------|------|----------|----------|-------|-------|-----------|-----------|
| ATRX | chrX | 76764047 | 76764131 | KMT2A | chr11 | 118365110 | 118365200 |
| ATRX | chrX | 76776257 | 76776348 | KMT2A | chr11 | 118365310 | 118365423 |
| ATRX | chrX | 76776348 | 76776416 | KMT2A | chr11 | 118365423 | 118365509 |
| ATRX | chrX | 76776849 | 76776937 | KMT2A | chr11 | 118366319 | 118366425 |
| ATRX | chrX | 76776937 | 76777027 | KMT2A | chr11 | 118366425 | 118366517 |
| ATRX | chrX | 76777678 | 76777798 | KMT2A | chr11 | 118366517 | 118366608 |
| ATRX | chrX | 76777798 | 76777883 | KMT2A | chr11 | 118366958 | 118367083 |
| ATRX | chrX | 76778663 | 76778759 | KMT2A | chr11 | 118368578 | 118368694 |
| ATRX | chrX | 76778758 | 76778870 | KMT2A | chr11 | 118368694 | 118368809 |
| ATRX | chrX | 76778869 | 76778938 | KMT2A | chr11 | 118369027 | 118369154 |
| ATRX | chrX | 76812899 | 76813013 | KMT2A | chr11 | 118369153 | 118369235 |
| ATRX | chrX | 76812996 | 76813101 | KMT2A | chr11 | 118369924 | 118370019 |
| ATRX | chrX | 76813100 | 76813169 | KMT2A | chr11 | 118370019 | 118370136 |
| ATRX | chrX | 76814058 | 76814157 | KMT2A | chr11 | 118370530 | 118370630 |
| ATRX | chrX | 76814145 | 76814211 | KMT2A | chr11 | 118371625 | 118371750 |
| ATRX | chrX | 76814241 | 76814311 | KMT2A | chr11 | 118371750 | 118371862 |
| ATRX | chrX | 76829629 | 76829754 | KMT2A | chr11 | 118372289 | 118372391 |
| ATRX | chrX | 76829754 | 76829859 | KMT2A | chr11 | 118372391 | 118372462 |
| ATRX | chrX | 76845217 | 76845330 | KMT2A | chr11 | 118372462 | 118372588 |
| ATRX | chrX | 76845307 | 76845386 | KMT2A | chr11 | 118373077 | 118373197 |
| ATRX | chrX | 76849104 | 76849218 | KMT2A | chr11 | 118373194 | 118373317 |
| ATRX | chrX | 76849187 | 76849260 | KMT2A | chr11 | 118373305 | 118373404 |
| ATRX | chrX | 76849260 | 76849354 | KMT2A | chr11 | 118373403 | 118373524 |
| ATRX | chrX | 76854869 | 76854968 | KMT2A | chr11 | 118373524 | 118373641 |
| ATRX | chrX | 76854964 | 76855084 | KMT2A | chr11 | 118373641 | 118373742 |
| ATRX | chrX | 76855186 | 76855260 | KMT2A | chr11 | 118373742 | 118373866 |
| ATRX | chrX | 76855258 | 76855360 | KMT2A | chr11 | 118373866 | 118373976 |
| ATRX | chrX | 76855876 | 76855973 | KMT2A | chr11 | 118373976 | 118374062 |
| ATRX | chrX | 76855958 | 76856041 | KMT2A | chr11 | 118374062 | 118374184 |
| ATRX | chrX | 76872040 | 76872126 | KMT2A | chr11 | 118374183 | 118374304 |
| ATRX | chrX | 76872126 | 76872241 | KMT2A | chr11 | 118374304 | 118374404 |
| ATRX | chrX | 76874226 | 76874317 | KMT2A | chr11 | 118374404 | 118374512 |
| ATRX | chrX | 76874310 | 76874384 | KMT2A | chr11 | 118374502 | 118374610 |
| ATRX | chrX | 76874380 | 76874458 | KMT2A | chr11 | 118374607 | 118374699 |
| ATRX | chrX | 76875749 | 76875867 | KMT2A | chr11 | 118374699 | 118374775 |
| ATRX | chrX | 76875867 | 76875962 | KMT2A | chr11 | 118374775 | 118374873 |
| ATRX | chrX | 76875961 | 76876078 | KMT2A | chr11 | 118374856 | 118374974 |
| ATRX | chrX | 76888681 | 76888789 | KMT2A | chr11 | 118374974 | 118375073 |
| ATRX | chrX | 76888765 | 76888842 | KMT2A | chr11 | 118375073 | 118375171 |
| ATRX | chrX | 76888842 | 76888931 | KMT2A | chr11 | 118375171 | 118375265 |

|      |      |          |          |       |       |           |           |
|------|------|----------|----------|-------|-------|-----------|-----------|
| ATRX | chrX | 76889063 | 76889138 | KMT2A | chr11 | 118375265 | 118375383 |
| ATRX | chrX | 76889112 | 76889195 | KMT2A | chr11 | 118375383 | 118375510 |
| ATRX | chrX | 76889179 | 76889285 | KMT2A | chr11 | 118375510 | 118375635 |
| ATRX | chrX | 76890081 | 76890157 | KMT2A | chr11 | 118375632 | 118375762 |
| ATRX | chrX | 76890153 | 76890241 | KMT2A | chr11 | 118375762 | 118375892 |
| ATRX | chrX | 76891357 | 76891459 | KMT2A | chr11 | 118375891 | 118376020 |
| ATRX | chrX | 76891420 | 76891494 | KMT2A | chr11 | 118376020 | 118376127 |
| ATRX | chrX | 76907625 | 76907710 | KMT2A | chr11 | 118376127 | 118376252 |
| ATRX | chrX | 76907643 | 76907731 | KMT2A | chr11 | 118376252 | 118376369 |
| ATRX | chrX | 76909521 | 76909637 | KMT2A | chr11 | 118376369 | 118376483 |
| ATRX | chrX | 76909637 | 76909756 | KMT2A | chr11 | 118376481 | 118376582 |
| ATRX | chrX | 76912003 | 76912084 | KMT2A | chr11 | 118376582 | 118376677 |
| ATRX | chrX | 76912084 | 76912204 | KMT2A | chr11 | 118376677 | 118376752 |
| ATRX | chrX | 76918896 | 76918971 | KMT2A | chr11 | 118376752 | 118376835 |
| ATRX | chrX | 76918971 | 76919069 | KMT2A | chr11 | 118376835 | 118376946 |
| ATRX | chrX | 76920080 | 76920185 | KMT2A | chr11 | 118376943 | 118377068 |
| ATRX | chrX | 76920162 | 76920242 | KMT2A | chr11 | 118377067 | 118377155 |
| ATRX | chrX | 76931631 | 76931760 | KMT2A | chr11 | 118377134 | 118377264 |
| ATRX | chrX | 76931760 | 76931885 | KMT2A | chr11 | 118377264 | 118377362 |
| ATRX | chrX | 76936934 | 76937037 | KMT2A | chr11 | 118378227 | 118378351 |
| ATRX | chrX | 76937037 | 76937127 | KMT2A | chr11 | 118379793 | 118379914 |
| ATRX | chrX | 76937116 | 76937199 | KMT2A | chr11 | 118380645 | 118380729 |
| ATRX | chrX | 76937197 | 76937283 | KMT2A | chr11 | 118380729 | 118380833 |
| ATRX | chrX | 76937283 | 76937374 | KMT2A | chr11 | 118382619 | 118382740 |
| ATRX | chrX | 76937366 | 76937461 | KMT2A | chr11 | 118390293 | 118390421 |
| ATRX | chrX | 76937458 | 76937546 | KMT2A | chr11 | 118390421 | 118390512 |
| ATRX | chrX | 76937542 | 76937613 | KMT2A | chr11 | 118390585 | 118390673 |
| ATRX | chrX | 76937689 | 76937804 | KMT2A | chr11 | 118390673 | 118390779 |
| ATRX | chrX | 76937804 | 76937884 | KMT2A | chr11 | 118391419 | 118391525 |
| ATRX | chrX | 76937878 | 76937993 | KMT2A | chr11 | 118391525 | 118391646 |
| ATRX | chrX | 76937992 | 76938118 | KMT2A | chr11 | 118391932 | 118392054 |
| ATRX | chrX | 76938118 | 76938187 | KMT2A | chr11 | 118392054 | 118392142 |
| ATRX | chrX | 76938368 | 76938491 | KMT2A | chr11 | 118392607 | 118392732 |
| ATRX | chrX | 76938462 | 76938534 | KMT2A | chr11 | 118392732 | 118392816 |
| ATRX | chrX | 76938534 | 76938608 | KMT2A | chr11 | 118392812 | 118392931 |
| ATRX | chrX | 76938593 | 76938663 | KMT2D | chr12 | 49415521  | 49415641  |
| ATRX | chrX | 76938657 | 76938770 | KMT2D | chr12 | 49415630  | 49415739  |
| ATRX | chrX | 76938770 | 76938860 | KMT2D | chr12 | 49415756  | 49415878  |
| ATRX | chrX | 76938860 | 76938953 | KMT2D | chr12 | 49415868  | 49415957  |
| ATRX | chrX | 76938953 | 76939063 | KMT2D | chr12 | 49416037  | 49416164  |

|       |      |           |           |       |       |          |          |
|-------|------|-----------|-----------|-------|-------|----------|----------|
| ATRX  | chrX | 76939038  | 76939133  | KMT2D | chr12 | 49416340 | 49416444 |
| ATRX  | chrX | 76939130  | 76939203  | KMT2D | chr12 | 49416433 | 49416546 |
| ATRX  | chrX | 76939194  | 76939301  | KMT2D | chr12 | 49416534 | 49416631 |
| ATRX  | chrX | 76939301  | 76939375  | KMT2D | chr12 | 49416622 | 49416703 |
| ATRX  | chrX | 76939372  | 76939467  | KMT2D | chr12 | 49418271 | 49418378 |
| ATRX  | chrX | 76939459  | 76939528  | KMT2D | chr12 | 49418373 | 49418501 |
| ATRX  | chrX | 76939522  | 76939594  | KMT2D | chr12 | 49418555 | 49418674 |
| ATRX  | chrX | 76939594  | 76939675  | KMT2D | chr12 | 49418664 | 49418762 |
| ATRX  | chrX | 76939671  | 76939741  | KMT2D | chr12 | 49419919 | 49420039 |
| ATRX  | chrX | 76939740  | 76939855  | KMT2D | chr12 | 49420028 | 49420141 |
| ATRX  | chrX | 76939822  | 76939896  | KMT2D | chr12 | 49420108 | 49420214 |
| ATRX  | chrX | 76939995  | 76940106  | KMT2D | chr12 | 49420265 | 49420392 |
| ATRX  | chrX | 76940407  | 76940492  | KMT2D | chr12 | 49420381 | 49420502 |
| ATRX  | chrX | 76944341  | 76944419  | KMT2D | chr12 | 49420522 | 49420637 |
| ATRX  | chrX | 76944419  | 76944496  | KMT2D | chr12 | 49420568 | 49420700 |
| ATRX  | chrX | 76949261  | 76949373  | KMT2D | chr12 | 49420684 | 49420807 |
| ATRX  | chrX | 76949373  | 76949463  | KMT2D | chr12 | 49420806 | 49420926 |
| ATRX  | chrX | 76951959  | 76952068  | KMT2D | chr12 | 49420882 | 49421005 |
| ATRX  | chrX | 76952138  | 76952223  | KMT2D | chr12 | 49420962 | 49421064 |
| ATRX  | chrX | 76952994  | 76953089  | KMT2D | chr12 | 49421059 | 49421139 |
| ATRX  | chrX | 76953078  | 76953152  | KMT2D | chr12 | 49421489 | 49421606 |
| ATRX  | chrX | 76954001  | 76954079  | KMT2D | chr12 | 49421595 | 49421723 |
| ATRX  | chrX | 76954079  | 76954172  | KMT2D | chr12 | 49421750 | 49421874 |
| ATRX  | chrX | 76972599  | 76972678  | KMT2D | chr12 | 49421864 | 49421943 |
| ATRX  | chrX | 76972678  | 76972781  | KMT2D | chr12 | 49422530 | 49422657 |
| ATRX  | chrX | 77041367  | 77041475  | KMT2D | chr12 | 49422646 | 49422751 |
| ATRX  | chrX | 77041475  | 77041555  | KMT2D | chr12 | 49422738 | 49422835 |
| CSMD3 | chr8 | 113236965 | 113237070 | KMT2D | chr12 | 49422849 | 49422963 |
| CSMD3 | chr8 | 113237070 | 113237195 | KMT2D | chr12 | 49422935 | 49423029 |
| CSMD3 | chr8 | 113240929 | 113241038 | KMT2D | chr12 | 49423118 | 49423231 |
| CSMD3 | chr8 | 113241066 | 113241169 | KMT2D | chr12 | 49423208 | 49423306 |
| CSMD3 | chr8 | 113243750 | 113243822 | KMT2D | chr12 | 49424024 | 49424151 |
| CSMD3 | chr8 | 113243815 | 113243893 | KMT2D | chr12 | 49424150 | 49424241 |
| CSMD3 | chr8 | 113246544 | 113246633 | KMT2D | chr12 | 49424274 | 49424400 |
| CSMD3 | chr8 | 113246633 | 113246714 | KMT2D | chr12 | 49424389 | 49424493 |
| CSMD3 | chr8 | 113249405 | 113249518 | KMT2D | chr12 | 49424473 | 49424561 |
| CSMD3 | chr8 | 113249518 | 113249590 | KMT2D | chr12 | 49424607 | 49424732 |
| CSMD3 | chr8 | 113253972 | 113254102 | KMT2D | chr12 | 49424697 | 49424813 |
| CSMD3 | chr8 | 113256585 | 113256661 | KMT2D | chr12 | 49424802 | 49424913 |
| CSMD3 | chr8 | 113256640 | 113256723 | KMT2D | chr12 | 49424943 | 49425059 |

|       |      |           |           |       |       |          |          |
|-------|------|-----------|-----------|-------|-------|----------|----------|
| CSMD3 | chr8 | 113256722 | 113256794 | KMT2D | chr12 | 49424963 | 49425089 |
| CSMD3 | chr8 | 113256792 | 113256868 | KMT2D | chr12 | 49425108 | 49425240 |
| CSMD3 | chr8 | 113259192 | 113259277 | KMT2D | chr12 | 49425235 | 49425358 |
| CSMD3 | chr8 | 113259276 | 113259397 | KMT2D | chr12 | 49425384 | 49425511 |
| CSMD3 | chr8 | 113266436 | 113266541 | KMT2D | chr12 | 49425406 | 49425534 |
| CSMD3 | chr8 | 113266541 | 113266638 | KMT2D | chr12 | 49425598 | 49425696 |
| CSMD3 | chr8 | 113267438 | 113267531 | KMT2D | chr12 | 49425790 | 49425895 |
| CSMD3 | chr8 | 113267531 | 113267613 | KMT2D | chr12 | 49425884 | 49425980 |
| CSMD3 | chr8 | 113267613 | 113267710 | KMT2D | chr12 | 49425970 | 49426062 |
| CSMD3 | chr8 | 113275805 | 113275931 | KMT2D | chr12 | 49426046 | 49426178 |
| CSMD3 | chr8 | 113275926 | 113276049 | KMT2D | chr12 | 49426177 | 49426304 |
| CSMD3 | chr8 | 113277648 | 113277746 | KMT2D | chr12 | 49426295 | 49426406 |
| CSMD3 | chr8 | 113277746 | 113277829 | KMT2D | chr12 | 49426391 | 49426514 |
| CSMD3 | chr8 | 113293304 | 113293431 | KMT2D | chr12 | 49426536 | 49426622 |
| CSMD3 | chr8 | 113293431 | 113293507 | KMT2D | chr12 | 49426610 | 49426693 |
| CSMD3 | chr8 | 113293506 | 113293573 | KMT2D | chr12 | 49426676 | 49426781 |
| CSMD3 | chr8 | 113299258 | 113299347 | KMT2D | chr12 | 49426808 | 49426936 |
| CSMD3 | chr8 | 113299346 | 113299469 | KMT2D | chr12 | 49426870 | 49427001 |
| CSMD3 | chr8 | 113299469 | 113299555 | KMT2D | chr12 | 49427071 | 49427192 |
| CSMD3 | chr8 | 113301478 | 113301591 | KMT2D | chr12 | 49427196 | 49427286 |
| CSMD3 | chr8 | 113301591 | 113301707 | KMT2D | chr12 | 49427249 | 49427364 |
| CSMD3 | chr8 | 113301707 | 113301807 | KMT2D | chr12 | 49427353 | 49427480 |
| CSMD3 | chr8 | 113303701 | 113303812 | KMT2D | chr12 | 49427469 | 49427585 |
| CSMD3 | chr8 | 113303768 | 113303840 | KMT2D | chr12 | 49427604 | 49427734 |
| CSMD3 | chr8 | 113304720 | 113304839 | KMT2D | chr12 | 49427723 | 49427847 |
| CSMD3 | chr8 | 113304839 | 113304958 | KMT2D | chr12 | 49427871 | 49427984 |
| CSMD3 | chr8 | 113308019 | 113308095 | KMT2D | chr12 | 49427916 | 49428039 |
| CSMD3 | chr8 | 113308095 | 113308218 | KMT2D | chr12 | 49428157 | 49428287 |
| CSMD3 | chr8 | 113308218 | 113308299 | KMT2D | chr12 | 49428281 | 49428382 |
| CSMD3 | chr8 | 113313978 | 113314065 | KMT2D | chr12 | 49428364 | 49428460 |
| CSMD3 | chr8 | 113314065 | 113314144 | KMT2D | chr12 | 49428565 | 49428670 |
| CSMD3 | chr8 | 113314144 | 113314229 | KMT2D | chr12 | 49428659 | 49428756 |
| CSMD3 | chr8 | 113316911 | 113317034 | KMT2D | chr12 | 49430869 | 49430993 |
| CSMD3 | chr8 | 113317032 | 113317149 | KMT2D | chr12 | 49430981 | 49431087 |
| CSMD3 | chr8 | 113318150 | 113318272 | KMT2D | chr12 | 49431076 | 49431197 |
| CSMD3 | chr8 | 113318272 | 113318364 | KMT2D | chr12 | 49431192 | 49431324 |
| CSMD3 | chr8 | 113318364 | 113318477 | KMT2D | chr12 | 49431292 | 49431415 |
| CSMD3 | chr8 | 113323125 | 113323250 | KMT2D | chr12 | 49431397 | 49431494 |
| CSMD3 | chr8 | 113323250 | 113323357 | KMT2D | chr12 | 49431483 | 49431612 |
| CSMD3 | chr8 | 113323357 | 113323429 | KMT2D | chr12 | 49431601 | 49431723 |



|       |      |           |           |       |       |          |          |
|-------|------|-----------|-----------|-------|-------|----------|----------|
| CSMD3 | chr8 | 113326119 | 113326243 | KMT2D | chr12 | 49431681 | 49431813 |
| CSMD3 | chr8 | 113326253 | 113326378 | KMT2D | chr12 | 49431804 | 49431932 |
| CSMD3 | chr8 | 113326579 | 113326671 | KMT2D | chr12 | 49431921 | 49432041 |
| CSMD3 | chr8 | 113326671 | 113326763 | KMT2D | chr12 | 49432030 | 49432136 |
| CSMD3 | chr8 | 113326763 | 113326868 | KMT2D | chr12 | 49432125 | 49432244 |
| CSMD3 | chr8 | 113330969 | 113331084 | KMT2D | chr12 | 49432187 | 49432297 |
| CSMD3 | chr8 | 113331079 | 113331185 | KMT2D | chr12 | 49432286 | 49432401 |
| CSMD3 | chr8 | 113332109 | 113332229 | KMT2D | chr12 | 49432368 | 49432504 |
| CSMD3 | chr8 | 113347547 | 113347662 | KMT2D | chr12 | 49432493 | 49432623 |
| CSMD3 | chr8 | 113347657 | 113347738 | KMT2D | chr12 | 49432622 | 49432740 |
| CSMD3 | chr8 | 113348808 | 113348935 | KMT2D | chr12 | 49432729 | 49432807 |
| CSMD3 | chr8 | 113348933 | 113349024 | KMT2D | chr12 | 49432943 | 49433061 |
| CSMD3 | chr8 | 113348980 | 113349099 | KMT2D | chr12 | 49433029 | 49433151 |
| CSMD3 | chr8 | 113349755 | 113349847 | KMT2D | chr12 | 49433144 | 49433243 |
| CSMD3 | chr8 | 113349847 | 113349954 | KMT2D | chr12 | 49433232 | 49433359 |
| CSMD3 | chr8 | 113349954 | 113350043 | KMT2D | chr12 | 49433378 | 49433482 |
| CSMD3 | chr8 | 113353729 | 113353810 | KMT2D | chr12 | 49433437 | 49433516 |
| CSMD3 | chr8 | 113353806 | 113353893 | KMT2D | chr12 | 49433601 | 49433705 |
| CSMD3 | chr8 | 113353872 | 113353948 | KMT2D | chr12 | 49433664 | 49433797 |
| CSMD3 | chr8 | 113358281 | 113358383 | KMT2D | chr12 | 49433797 | 49433906 |
| CSMD3 | chr8 | 113358379 | 113358452 | KMT2D | chr12 | 49433874 | 49433967 |
| CSMD3 | chr8 | 113363333 | 113363434 | KMT2D | chr12 | 49433957 | 49434088 |
| CSMD3 | chr8 | 113363451 | 113363554 | KMT2D | chr12 | 49434007 | 49434109 |
| CSMD3 | chr8 | 113364629 | 113364729 | KMT2D | chr12 | 49434212 | 49434326 |
| CSMD3 | chr8 | 113364729 | 113364794 | KMT2D | chr12 | 49434323 | 49434457 |
| CSMD3 | chr8 | 113392565 | 113392659 | KMT2D | chr12 | 49434454 | 49434586 |
| CSMD3 | chr8 | 113392626 | 113392702 | KMT2D | chr12 | 49434586 | 49434682 |
| CSMD3 | chr8 | 113395735 | 113395851 | KMT2D | chr12 | 49434671 | 49434782 |
| CSMD3 | chr8 | 113395851 | 113395936 | KMT2D | chr12 | 49435045 | 49435168 |
| CSMD3 | chr8 | 113402807 | 113402927 | KMT2D | chr12 | 49435150 | 49435282 |
| CSMD3 | chr8 | 113402927 | 113403023 | KMT2D | chr12 | 49435276 | 49435398 |
| CSMD3 | chr8 | 113418754 | 113418856 | KMT2D | chr12 | 49435405 | 49435494 |
| CSMD3 | chr8 | 113418810 | 113418885 | KMT2D | chr12 | 49435488 | 49435569 |
| CSMD3 | chr8 | 113420501 | 113420568 | KMT2D | chr12 | 49435679 | 49435788 |
| CSMD3 | chr8 | 113420549 | 113420641 | KMT2D | chr12 | 49435768 | 49435893 |
| CSMD3 | chr8 | 113420641 | 113420718 | KMT2D | chr12 | 49435882 | 49435983 |
| CSMD3 | chr8 | 113421136 | 113421267 | KMT2D | chr12 | 49436225 | 49436339 |
| CSMD3 | chr8 | 113484776 | 113484875 | KMT2D | chr12 | 49436338 | 49436439 |
| CSMD3 | chr8 | 113484833 | 113484924 | KMT2D | chr12 | 49436494 | 49436611 |
| CSMD3 | chr8 | 113504613 | 113504741 | KMT2D | chr12 | 49436604 | 49436683 |

|       |      |           |           |       |       |          |          |
|-------|------|-----------|-----------|-------|-------|----------|----------|
| CSMD3 | chr8 | 113504741 | 113504839 | KMT2D | chr12 | 49436781 | 49436883 |
| CSMD3 | chr8 | 113504826 | 113504905 | KMT2D | chr12 | 49436872 | 49436980 |
| CSMD3 | chr8 | 113515966 | 113516088 | KMT2D | chr12 | 49437076 | 49437176 |
| CSMD3 | chr8 | 113516088 | 113516174 | KMT2D | chr12 | 49437162 | 49437245 |
| CSMD3 | chr8 | 113516169 | 113516242 | KMT2D | chr12 | 49437378 | 49437507 |
| CSMD3 | chr8 | 113518879 | 113519001 | KMT2D | chr12 | 49437495 | 49437578 |
| CSMD3 | chr8 | 113518999 | 113519123 | KMT2D | chr12 | 49437565 | 49437667 |
| CSMD3 | chr8 | 113529228 | 113529311 | KMT2D | chr12 | 49437661 | 49437768 |
| CSMD3 | chr8 | 113529310 | 113529396 | KMT2D | chr12 | 49437726 | 49437830 |
| CSMD3 | chr8 | 113529391 | 113529464 | KMT2D | chr12 | 49437938 | 49438068 |
| CSMD3 | chr8 | 113562879 | 113562964 | KMT2D | chr12 | 49438057 | 49438190 |
| CSMD3 | chr8 | 113562964 | 113563047 | KMT2D | chr12 | 49438105 | 49438232 |
| CSMD3 | chr8 | 113564785 | 113564873 | KMT2D | chr12 | 49438432 | 49438562 |
| CSMD3 | chr8 | 113564873 | 113564972 | KMT2D | chr12 | 49438547 | 49438679 |
| CSMD3 | chr8 | 113568913 | 113568993 | KMT2D | chr12 | 49438678 | 49438758 |
| CSMD3 | chr8 | 113568993 | 113569065 | KMT2D | chr12 | 49439612 | 49439742 |
| CSMD3 | chr8 | 113569046 | 113569169 | KMT2D | chr12 | 49439722 | 49439840 |
| CSMD3 | chr8 | 113585711 | 113585834 | KMT2D | chr12 | 49439861 | 49439970 |
| CSMD3 | chr8 | 113585833 | 113585917 | KMT2D | chr12 | 49440023 | 49440131 |
| CSMD3 | chr8 | 113599288 | 113599396 | KMT2D | chr12 | 49440104 | 49440217 |
| CSMD3 | chr8 | 113599313 | 113599413 | KMT2D | chr12 | 49440333 | 49440462 |
| CSMD3 | chr8 | 113648987 | 113649107 | KMT2D | chr12 | 49440457 | 49440583 |
| CSMD3 | chr8 | 113649107 | 113649195 | KMT2D | chr12 | 49441642 | 49441768 |
| CSMD3 | chr8 | 113649195 | 113649266 | KMT2D | chr12 | 49441758 | 49441862 |
| CSMD3 | chr8 | 113650878 | 113650968 | KMT2D | chr12 | 49442345 | 49442451 |
| CSMD3 | chr8 | 113650993 | 113651083 | KMT2D | chr12 | 49442440 | 49442562 |
| CSMD3 | chr8 | 113651083 | 113651168 | KMT2D | chr12 | 49442777 | 49442903 |
| CSMD3 | chr8 | 113657287 | 113657381 | KMT2D | chr12 | 49442892 | 49443017 |
| CSMD3 | chr8 | 113657381 | 113657461 | KMT2D | chr12 | 49443422 | 49443549 |
| CSMD3 | chr8 | 113662362 | 113662453 | KMT2D | chr12 | 49443538 | 49443620 |
| CSMD3 | chr8 | 113662429 | 113662536 | KMT2D | chr12 | 49443596 | 49443725 |
| CSMD3 | chr8 | 113662533 | 113662616 | KMT2D | chr12 | 49443716 | 49443803 |
| CSMD3 | chr8 | 113668357 | 113668453 | KMT2D | chr12 | 49443789 | 49443917 |
| CSMD3 | chr8 | 113668438 | 113668538 | KMT2D | chr12 | 49443943 | 49444022 |
| CSMD3 | chr8 | 113668538 | 113668610 | KMT2D | chr12 | 49443999 | 49444127 |
| CSMD3 | chr8 | 113678417 | 113678536 | KMT2D | chr12 | 49444126 | 49444217 |
| CSMD3 | chr8 | 113678536 | 113678624 | KMT2D | chr12 | 49444207 | 49444317 |
| CSMD3 | chr8 | 113678607 | 113678710 | KMT2D | chr12 | 49444303 | 49444395 |
| CSMD3 | chr8 | 113694604 | 113694689 | KMT2D | chr12 | 49444470 | 49444588 |
| CSMD3 | chr8 | 113694689 | 113694809 | KMT2D | chr12 | 49444650 | 49444775 |

|       |      |           |           |       |       |           |           |
|-------|------|-----------|-----------|-------|-------|-----------|-----------|
| CSMD3 | chr8 | 113694828 | 113694905 | KMT2D | chr12 | 49444693  | 49444828  |
| CSMD3 | chr8 | 113697531 | 113697655 | KMT2D | chr12 | 49444928  | 49445045  |
| CSMD3 | chr8 | 113697659 | 113697755 | KMT2D | chr12 | 49445026  | 49445113  |
| CSMD3 | chr8 | 113697748 | 113697832 | KMT2D | chr12 | 49445090  | 49445176  |
| CSMD3 | chr8 | 113697831 | 113697904 | KMT2D | chr12 | 49445145  | 49445263  |
| CSMD3 | chr8 | 113697882 | 113697963 | KMT2D | chr12 | 49445293  | 49445402  |
| CSMD3 | chr8 | 113702090 | 113702194 | KMT2D | chr12 | 49445334  | 49445452  |
| CSMD3 | chr8 | 113702194 | 113702310 | KMT2D | chr12 | 49445468  | 49445561  |
| CSMD3 | chr8 | 113812296 | 113812417 | KMT2D | chr12 | 49445552  | 49445669  |
| CSMD3 | chr8 | 113812417 | 113812508 | KMT2D | chr12 | 49445660  | 49445754  |
| CSMD3 | chr8 | 113841846 | 113841967 | KMT2D | chr12 | 49445714  | 49445803  |
| CSMD3 | chr8 | 113841967 | 113842081 | KMT2D | chr12 | 49445793  | 49445921  |
| CSMD3 | chr8 | 113871327 | 113871449 | KMT2D | chr12 | 49445910  | 49446044  |
| CSMD3 | chr8 | 113871449 | 113871522 | KMT2D | chr12 | 49446033  | 49446145  |
| CSMD3 | chr8 | 113933767 | 113933870 | KMT2D | chr12 | 49446111  | 49446217  |
| CSMD3 | chr8 | 113933853 | 113933945 | KMT2D | chr12 | 49446249  | 49446377  |
| CSMD3 | chr8 | 113933945 | 113934029 | KMT2D | chr12 | 49446366  | 49446483  |
| CSMD3 | chr8 | 113959937 | 113960063 | KMT2D | chr12 | 49446659  | 49446789  |
| CSMD3 | chr8 | 113966943 | 113967066 | KMT2D | chr12 | 49446782  | 49446872  |
| CSMD3 | chr8 | 113988046 | 113988127 | KMT2D | chr12 | 49446895  | 49447014  |
| CSMD3 | chr8 | 113988127 | 113988239 | KMT2D | chr12 | 49447003  | 49447114  |
| CSMD3 | chr8 | 113988239 | 113988351 | KMT2D | chr12 | 49447240  | 49447368  |
| CSMD3 | chr8 | 113988351 | 113988476 | KMT2D | chr12 | 49447357  | 49447441  |
| CSMD3 | chr8 | 114031168 | 114031291 | KMT2D | chr12 | 49447722  | 49447850  |
| CSMD3 | chr8 | 114031291 | 114031364 | KMT2D | chr12 | 49447839  | 49447944  |
| CSMD3 | chr8 | 114031364 | 114031449 | KMT2D | chr12 | 49447988  | 49448114  |
| CSMD3 | chr8 | 114110962 | 114111084 | KMT2D | chr12 | 49448107  | 49448227  |
| CSMD3 | chr8 | 114111083 | 114111165 | KMT2D | chr12 | 49448216  | 49448345  |
| CSMD3 | chr8 | 114111164 | 114111285 | KMT2D | chr12 | 49448326  | 49448438  |
| CSMD3 | chr8 | 114185925 | 114186041 | KMT2D | chr12 | 49448459  | 49448540  |
| CSMD3 | chr8 | 114186039 | 114186121 | KMT2D | chr12 | 49448517  | 49448612  |
| CSMD3 | chr8 | 114186121 | 114186237 | KMT2D | chr12 | 49448633  | 49448719  |
| CSMD3 | chr8 | 114290797 | 114290867 | KMT2D | chr12 | 49448707  | 49448822  |
| CSMD3 | chr8 | 114290864 | 114290932 | KMT2D | chr12 | 49449023  | 49449145  |
| CSMD3 | chr8 | 114326780 | 114326900 | LRP1B | chr2  | 140990697 | 140990818 |
| CSMD3 | chr8 | 114326833 | 114326954 | LRP1B | chr2  | 140990811 | 140990928 |
| CSMD3 | chr8 | 114326943 | 114327019 | LRP1B | chr2  | 140992318 | 140992439 |
| CSMD3 | chr8 | 114388873 | 114388991 | LRP1B | chr2  | 140992428 | 140992539 |
| CSMD3 | chr8 | 114388988 | 114389083 | LRP1B | chr2  | 140995689 | 140995806 |
| CSMD3 | chr8 | 114448856 | 114448984 | LRP1B | chr2  | 140996978 | 140997092 |

|       |      |           |           |       |      |           |           |
|-------|------|-----------|-----------|-------|------|-----------|-----------|
| CSMD3 | chr8 | 114448983 | 114449098 | LRP1B | chr2 | 140997092 | 140997205 |
| DAXX  | chr6 | 33286486  | 33286609  | LRP1B | chr2 | 141004578 | 141004696 |
| DAXX  | chr6 | 33286760  | 33286892  | LRP1B | chr2 | 141004685 | 141004761 |
| DAXX  | chr6 | 33286887  | 33287005  | LRP1B | chr2 | 141027774 | 141027878 |
| DAXX  | chr6 | 33287116  | 33287242  | LRP1B | chr2 | 141027867 | 141027942 |
| DAXX  | chr6 | 33287240  | 33287337  | LRP1B | chr2 | 141031885 | 141032009 |
| DAXX  | chr6 | 33287336  | 33287434  | LRP1B | chr2 | 141031998 | 141032121 |
| DAXX  | chr6 | 33287434  | 33287552  | LRP1B | chr2 | 141032114 | 141032221 |
| DAXX  | chr6 | 33287549  | 33287650  | LRP1B | chr2 | 141055357 | 141055481 |
| DAXX  | chr6 | 33287792  | 33287921  | LRP1B | chr2 | 141055479 | 141055596 |
| DAXX  | chr6 | 33287943  | 33288039  | LRP1B | chr2 | 141072485 | 141072569 |
| DAXX  | chr6 | 33288143  | 33288271  | LRP1B | chr2 | 141072558 | 141072680 |
| DAXX  | chr6 | 33288268  | 33288373  | LRP1B | chr2 | 141079444 | 141079562 |
| DAXX  | chr6 | 33288475  | 33288591  | LRP1B | chr2 | 141079551 | 141079633 |
| DAXX  | chr6 | 33288591  | 33288721  | LRP1B | chr2 | 141079622 | 141079729 |
| DAXX  | chr6 | 33288713  | 33288828  | LRP1B | chr2 | 141081373 | 141081478 |
| DAXX  | chr6 | 33288828  | 33288918  | LRP1B | chr2 | 141081492 | 141081576 |
| DAXX  | chr6 | 33288918  | 33289040  | LRP1B | chr2 | 141081565 | 141081679 |
| DAXX  | chr6 | 33289038  | 33289137  | LRP1B | chr2 | 141083235 | 141083345 |
| DAXX  | chr6 | 33289135  | 33289250  | LRP1B | chr2 | 141083334 | 141083457 |
| DAXX  | chr6 | 33289242  | 33289317  | LRP1B | chr2 | 141091970 | 141092046 |
| DAXX  | chr6 | 33289326  | 33289458  | LRP1B | chr2 | 141092035 | 141092142 |
| DAXX  | chr6 | 33289488  | 33289576  | LRP1B | chr2 | 141093096 | 141093208 |
| DAXX  | chr6 | 33289563  | 33289676  | LRP1B | chr2 | 141093197 | 141093317 |
| DAXX  | chr6 | 33289671  | 33289798  | LRP1B | chr2 | 141093306 | 141093417 |
| DAXX  | chr6 | 33290581  | 33290707  | LRP1B | chr2 | 141108350 | 141108425 |
| KMT2C | chr7 | 151833860 | 151833980 | LRP1B | chr2 | 141108414 | 141108532 |
| KMT2C | chr7 | 151833969 | 151834062 | LRP1B | chr2 | 141108504 | 141108592 |
| KMT2C | chr7 | 151835759 | 151835866 | LRP1B | chr2 | 141108583 | 141108700 |
| KMT2C | chr7 | 151835855 | 151835975 | LRP1B | chr2 | 141110439 | 141110540 |
| KMT2C | chr7 | 151835964 | 151836082 | LRP1B | chr2 | 141110529 | 141110636 |
| KMT2C | chr7 | 151836208 | 151836326 | LRP1B | chr2 | 141110624 | 141110747 |
| KMT2C | chr7 | 151836315 | 151836396 | LRP1B | chr2 | 141113853 | 141113923 |
| KMT2C | chr7 | 151836657 | 151836749 | LRP1B | chr2 | 141113912 | 141114021 |
| KMT2C | chr7 | 151836738 | 151836815 | LRP1B | chr2 | 141114010 | 141114120 |
| KMT2C | chr7 | 151836804 | 151836926 | LRP1B | chr2 | 141115485 | 141115603 |
| KMT2C | chr7 | 151841705 | 151841814 | LRP1B | chr2 | 141115592 | 141115703 |
| KMT2C | chr7 | 151841803 | 151841913 | LRP1B | chr2 | 141116347 | 141116452 |
| KMT2C | chr7 | 151841902 | 151842016 | LRP1B | chr2 | 141116441 | 141116531 |
| KMT2C | chr7 | 151842116 | 151842227 | LRP1B | chr2 | 141122152 | 141122275 |

|       |      |           |           |       |      |           |           |
|-------|------|-----------|-----------|-------|------|-----------|-----------|
| KMT2C | chr7 | 151842216 | 151842338 | LRP1B | chr2 | 141122264 | 141122370 |
| KMT2C | chr7 | 151842327 | 151842430 | LRP1B | chr2 | 141128204 | 141128311 |
| KMT2C | chr7 | 151843534 | 151843656 | LRP1B | chr2 | 141128300 | 141128421 |
| KMT2C | chr7 | 151843645 | 151843775 | LRP1B | chr2 | 141128704 | 141128783 |
| KMT2C | chr7 | 151843763 | 151843871 | LRP1B | chr2 | 141128767 | 141128838 |
| KMT2C | chr7 | 151845051 | 151845133 | LRP1B | chr2 | 141130496 | 141130601 |
| KMT2C | chr7 | 151845122 | 151845230 | LRP1B | chr2 | 141130590 | 141130668 |
| KMT2C | chr7 | 151845220 | 151845329 | LRP1B | chr2 | 141130657 | 141130745 |
| KMT2C | chr7 | 151845318 | 151845434 | LRP1B | chr2 | 141135724 | 141135837 |
| KMT2C | chr7 | 151845423 | 151845533 | LRP1B | chr2 | 141135833 | 141135949 |
| KMT2C | chr7 | 151845522 | 151845648 | LRP1B | chr2 | 141143370 | 141143486 |
| KMT2C | chr7 | 151845637 | 151845759 | LRP1B | chr2 | 141143475 | 141143588 |
| KMT2C | chr7 | 151845748 | 151845827 | LRP1B | chr2 | 141199994 | 141200118 |
| KMT2C | chr7 | 151845816 | 151845908 | LRP1B | chr2 | 141200107 | 141200202 |
| KMT2C | chr7 | 151845897 | 151846015 | LRP1B | chr2 | 141201881 | 141201956 |
| KMT2C | chr7 | 151846001 | 151846110 | LRP1B | chr2 | 141201945 | 141202050 |
| KMT2C | chr7 | 151846164 | 151846287 | LRP1B | chr2 | 141202038 | 141202158 |
| KMT2C | chr7 | 151847909 | 151848030 | LRP1B | chr2 | 141202147 | 141202264 |
| KMT2C | chr7 | 151848019 | 151848094 | LRP1B | chr2 | 141208052 | 141208151 |
| KMT2C | chr7 | 151848083 | 151848189 | LRP1B | chr2 | 141208140 | 141208256 |
| KMT2C | chr7 | 151848421 | 151848551 | LRP1B | chr2 | 141213992 | 141214118 |
| KMT2C | chr7 | 151848540 | 151848651 | LRP1B | chr2 | 141214107 | 141214228 |
| KMT2C | chr7 | 151848640 | 151848720 | LRP1B | chr2 | 141215038 | 141215133 |
| KMT2C | chr7 | 151849681 | 151849803 | LRP1B | chr2 | 141215122 | 141215233 |
| KMT2C | chr7 | 151849792 | 151849915 | LRP1B | chr2 | 141232712 | 141232829 |
| KMT2C | chr7 | 151849904 | 151849997 | LRP1B | chr2 | 141232819 | 141232923 |
| KMT2C | chr7 | 151849986 | 151850103 | LRP1B | chr2 | 141242838 | 141242955 |
| KMT2C | chr7 | 151850995 | 151851118 | LRP1B | chr2 | 141242945 | 141243049 |
| KMT2C | chr7 | 151851107 | 151851196 | LRP1B | chr2 | 141243038 | 141243118 |
| KMT2C | chr7 | 151851185 | 151851293 | LRP1B | chr2 | 141245102 | 141245224 |
| KMT2C | chr7 | 151851334 | 151851457 | LRP1B | chr2 | 141245213 | 141245320 |
| KMT2C | chr7 | 151851447 | 151851534 | LRP1B | chr2 | 141250107 | 141250216 |
| KMT2C | chr7 | 151851523 | 151851601 | LRP1B | chr2 | 141250205 | 141250317 |
| KMT2C | chr7 | 151852927 | 151853011 | LRP1B | chr2 | 141253072 | 141253194 |
| KMT2C | chr7 | 151853009 | 151853126 | LRP1B | chr2 | 141253183 | 141253306 |
| KMT2C | chr7 | 151853123 | 151853210 | LRP1B | chr2 | 141253295 | 141253412 |
| KMT2C | chr7 | 151853268 | 151853369 | LRP1B | chr2 | 141259137 | 141259259 |
| KMT2C | chr7 | 151853358 | 151853481 | LRP1B | chr2 | 141259253 | 141259323 |
| KMT2C | chr7 | 151855827 | 151855932 | LRP1B | chr2 | 141259312 | 141259418 |
| KMT2C | chr7 | 151855921 | 151856000 | LRP1B | chr2 | 141259375 | 141259453 |

|       |      |           |           |       |      |           |           |
|-------|------|-----------|-----------|-------|------|-----------|-----------|
| KMT2C | chr7 | 151855989 | 151856091 | LRP1B | chr2 | 141260491 | 141260603 |
| KMT2C | chr7 | 151856080 | 151856207 | LRP1B | chr2 | 141260592 | 141260715 |
| KMT2C | chr7 | 151859130 | 151859245 | LRP1B | chr2 | 141264337 | 141264420 |
| KMT2C | chr7 | 151859234 | 151859317 | LRP1B | chr2 | 141264409 | 141264511 |
| KMT2C | chr7 | 151859306 | 151859423 | LRP1B | chr2 | 141267416 | 141267542 |
| KMT2C | chr7 | 151859418 | 151859529 | LRP1B | chr2 | 141267531 | 141267638 |
| KMT2C | chr7 | 151859518 | 151859623 | LRP1B | chr2 | 141272119 | 141272226 |
| KMT2C | chr7 | 151859614 | 151859742 | LRP1B | chr2 | 141272215 | 141272294 |
| KMT2C | chr7 | 151859742 | 151859851 | LRP1B | chr2 | 141272283 | 141272366 |
| KMT2C | chr7 | 151859840 | 151859959 | LRP1B | chr2 | 141274388 | 141274486 |
| KMT2C | chr7 | 151859948 | 151860062 | LRP1B | chr2 | 141274475 | 141274593 |
| KMT2C | chr7 | 151860051 | 151860163 | LRP1B | chr2 | 141283382 | 141283508 |
| KMT2C | chr7 | 151860152 | 151860268 | LRP1B | chr2 | 141283497 | 141283610 |
| KMT2C | chr7 | 151860257 | 151860384 | LRP1B | chr2 | 141283740 | 141283822 |
| KMT2C | chr7 | 151860373 | 151860486 | LRP1B | chr2 | 141283811 | 141283929 |
| KMT2C | chr7 | 151860475 | 151860604 | LRP1B | chr2 | 141291524 | 141291641 |
| KMT2C | chr7 | 151860593 | 151860709 | LRP1B | chr2 | 141291630 | 141291718 |
| KMT2C | chr7 | 151860703 | 151860836 | LRP1B | chr2 | 141291708 | 141291801 |
| KMT2C | chr7 | 151860829 | 151860936 | LRP1B | chr2 | 141294098 | 141294211 |
| KMT2C | chr7 | 151860925 | 151861017 | LRP1B | chr2 | 141294200 | 141294293 |
| KMT2C | chr7 | 151864171 | 151864263 | LRP1B | chr2 | 141298529 | 141298647 |
| KMT2C | chr7 | 151864252 | 151864334 | LRP1B | chr2 | 141298641 | 141298763 |
| KMT2C | chr7 | 151864323 | 151864432 | LRP1B | chr2 | 141299277 | 141299386 |
| KMT2C | chr7 | 151864413 | 151864532 | LRP1B | chr2 | 141299375 | 141299501 |
| KMT2C | chr7 | 151866186 | 151866299 | LRP1B | chr2 | 141299491 | 141299581 |
| KMT2C | chr7 | 151866285 | 151866353 | LRP1B | chr2 | 141356103 | 141356223 |
| KMT2C | chr7 | 151868296 | 151868398 | LRP1B | chr2 | 141356212 | 141356281 |
| KMT2C | chr7 | 151868387 | 151868492 | LRP1B | chr2 | 141356270 | 141356347 |
| KMT2C | chr7 | 151871137 | 151871257 | LRP1B | chr2 | 141356336 | 141356459 |
| KMT2C | chr7 | 151871246 | 151871355 | LRP1B | chr2 | 141359025 | 141359143 |
| KMT2C | chr7 | 151871322 | 151871426 | LRP1B | chr2 | 141359135 | 141359252 |
| KMT2C | chr7 | 151873159 | 151873245 | LRP1B | chr2 | 141457700 | 141457819 |
| KMT2C | chr7 | 151873234 | 151873337 | LRP1B | chr2 | 141457811 | 141457878 |
| KMT2C | chr7 | 151873326 | 151873456 | LRP1B | chr2 | 141457949 | 141458074 |
| KMT2C | chr7 | 151873445 | 151873568 | LRP1B | chr2 | 141458063 | 141458145 |
| KMT2C | chr7 | 151873557 | 151873662 | LRP1B | chr2 | 141458134 | 141458207 |
| KMT2C | chr7 | 151873651 | 151873763 | LRP1B | chr2 | 141459243 | 141459314 |
| KMT2C | chr7 | 151873752 | 151873876 | LRP1B | chr2 | 141459303 | 141459424 |
| KMT2C | chr7 | 151873851 | 151873944 | LRP1B | chr2 | 141459667 | 141459789 |
| KMT2C | chr7 | 151873933 | 151874055 | LRP1B | chr2 | 141459778 | 141459873 |

|       |      |           |           |       |      |           |           |
|-------|------|-----------|-----------|-------|------|-----------|-----------|
| KMT2C | chr7 | 151874044 | 151874154 | LRP1B | chr2 | 141459958 | 141460053 |
| KMT2C | chr7 | 151874143 | 151874227 | LRP1B | chr2 | 141460042 | 141460156 |
| KMT2C | chr7 | 151874216 | 151874329 | LRP1B | chr2 | 141473461 | 141473575 |
| KMT2C | chr7 | 151874318 | 151874392 | LRP1B | chr2 | 141473564 | 141473651 |
| KMT2C | chr7 | 151874381 | 151874459 | LRP1B | chr2 | 141473640 | 141473742 |
| KMT2C | chr7 | 151874448 | 151874562 | LRP1B | chr2 | 141474228 | 141474307 |
| KMT2C | chr7 | 151874551 | 151874677 | LRP1B | chr2 | 141474296 | 141474416 |
| KMT2C | chr7 | 151874666 | 151874779 | LRP1B | chr2 | 141526706 | 141526822 |
| KMT2C | chr7 | 151874777 | 151874874 | LRP1B | chr2 | 141526811 | 141526940 |
| KMT2C | chr7 | 151874863 | 151874957 | LRP1B | chr2 | 141528432 | 141528553 |
| KMT2C | chr7 | 151874946 | 151875066 | LRP1B | chr2 | 141528543 | 141528659 |
| KMT2C | chr7 | 151875055 | 151875172 | LRP1B | chr2 | 141533639 | 141533712 |
| KMT2C | chr7 | 151876880 | 151876975 | LRP1B | chr2 | 141533701 | 141533793 |
| KMT2C | chr7 | 151876964 | 151877058 | LRP1B | chr2 | 141533785 | 141533907 |
| KMT2C | chr7 | 151877047 | 151877173 | LRP1B | chr2 | 141571148 | 141571268 |
| KMT2C | chr7 | 151877162 | 151877255 | LRP1B | chr2 | 141571257 | 141571330 |
| KMT2C | chr7 | 151877739 | 151877851 | LRP1B | chr2 | 141571319 | 141571408 |
| KMT2C | chr7 | 151877841 | 151877965 | LRP1B | chr2 | 141597524 | 141597594 |
| KMT2C | chr7 | 151877948 | 151878072 | LRP1B | chr2 | 141597583 | 141597690 |
| KMT2C | chr7 | 151878057 | 151878160 | LRP1B | chr2 | 141598460 | 141598578 |
| KMT2C | chr7 | 151878148 | 151878251 | LRP1B | chr2 | 141598567 | 141598689 |
| KMT2C | chr7 | 151878239 | 151878363 | LRP1B | chr2 | 141607584 | 141607686 |
| KMT2C | chr7 | 151878353 | 151878480 | LRP1B | chr2 | 141607675 | 141607775 |
| KMT2C | chr7 | 151878469 | 151878593 | LRP1B | chr2 | 141607764 | 141607834 |
| KMT2C | chr7 | 151878582 | 151878692 | LRP1B | chr2 | 141607823 | 141607913 |
| KMT2C | chr7 | 151878681 | 151878806 | LRP1B | chr2 | 141609114 | 141609232 |
| KMT2C | chr7 | 151878795 | 151878924 | LRP1B | chr2 | 141609232 | 141609319 |
| KMT2C | chr7 | 151878915 | 151879033 | LRP1B | chr2 | 141609308 | 141609373 |
| KMT2C | chr7 | 151879022 | 151879142 | LRP1B | chr2 | 141625139 | 141625208 |
| KMT2C | chr7 | 151879131 | 151879233 | LRP1B | chr2 | 141625197 | 141625317 |
| KMT2C | chr7 | 151879213 | 151879319 | LRP1B | chr2 | 141625306 | 141625425 |
| KMT2C | chr7 | 151879307 | 151879435 | LRP1B | chr2 | 141625606 | 141625703 |
| KMT2C | chr7 | 151879424 | 151879539 | LRP1B | chr2 | 141625692 | 141625789 |
| KMT2C | chr7 | 151879528 | 151879640 | LRP1B | chr2 | 141625778 | 141625886 |
| KMT2C | chr7 | 151879629 | 151879749 | LRP1B | chr2 | 141641292 | 141641418 |
| KMT2C | chr7 | 151879949 | 151880040 | LRP1B | chr2 | 141641407 | 141641487 |
| KMT2C | chr7 | 151880029 | 151880147 | LRP1B | chr2 | 141641476 | 141641602 |
| KMT2C | chr7 | 151880136 | 151880233 | LRP1B | chr2 | 141643621 | 141643737 |
| KMT2C | chr7 | 151880223 | 151880339 | LRP1B | chr2 | 141643726 | 141643831 |
| KMT2C | chr7 | 151882542 | 151882666 | LRP1B | chr2 | 141643820 | 141643937 |

|       |      |           |           |       |      |           |           |
|-------|------|-----------|-----------|-------|------|-----------|-----------|
| KMT2C | chr7 | 151882655 | 151882766 | LRP1B | chr2 | 141660435 | 141660552 |
| KMT2C | chr7 | 151884253 | 151884369 | LRP1B | chr2 | 141660541 | 141660663 |
| KMT2C | chr7 | 151884358 | 151884459 | LRP1B | chr2 | 141660652 | 141660759 |
| KMT2C | chr7 | 151884446 | 151884545 | LRP1B | chr2 | 141665332 | 141665451 |
| KMT2C | chr7 | 151884547 | 151884661 | LRP1B | chr2 | 141665440 | 141665554 |
| KMT2C | chr7 | 151884696 | 151884817 | LRP1B | chr2 | 141665543 | 141665663 |
| KMT2C | chr7 | 151884806 | 151884885 | LRP1B | chr2 | 141680486 | 141680608 |
| KMT2C | chr7 | 151884874 | 151884982 | LRP1B | chr2 | 141680597 | 141680720 |
| KMT2C | chr7 | 151891012 | 151891139 | LRP1B | chr2 | 141680709 | 141680813 |
| KMT2C | chr7 | 151891119 | 151891200 | LRP1B | chr2 | 141707688 | 141707807 |
| KMT2C | chr7 | 151891189 | 151891271 | LRP1B | chr2 | 141707828 | 141707919 |
| KMT2C | chr7 | 151891505 | 151891599 | LRP1B | chr2 | 141707908 | 141707986 |
| KMT2C | chr7 | 151891588 | 151891703 | LRP1B | chr2 | 141709363 | 141709468 |
| KMT2C | chr7 | 151892875 | 151892989 | LRP1B | chr2 | 141709457 | 141709531 |
| KMT2C | chr7 | 151892978 | 151893075 | LRP1B | chr2 | 141739680 | 141739806 |
| KMT2C | chr7 | 151893062 | 151893146 | LRP1B | chr2 | 141739757 | 141739872 |
| KMT2C | chr7 | 151896287 | 151896408 | LRP1B | chr2 | 141747090 | 141747215 |
| KMT2C | chr7 | 151896397 | 151896515 | LRP1B | chr2 | 141747215 | 141747331 |
| KMT2C | chr7 | 151896494 | 151896597 | LRP1B | chr2 | 141751528 | 141751653 |
| KMT2C | chr7 | 151899895 | 151900005 | LRP1B | chr2 | 141751640 | 141751717 |
| KMT2C | chr7 | 151899995 | 151900081 | LRP1B | chr2 | 141762863 | 141762970 |
| KMT2C | chr7 | 151900109 | 151900200 | LRP1B | chr2 | 141762957 | 141763036 |
| KMT2C | chr7 | 151902097 | 151902214 | LRP1B | chr2 | 141771052 | 141771167 |
| KMT2C | chr7 | 151902203 | 151902278 | LRP1B | chr2 | 141771155 | 141771222 |
| KMT2C | chr7 | 151902267 | 151902360 | LRP1B | chr2 | 141771211 | 141771324 |
| KMT2C | chr7 | 151904284 | 151904385 | LRP1B | chr2 | 141773217 | 141773337 |
| KMT2C | chr7 | 151904374 | 151904467 | LRP1B | chr2 | 141773326 | 141773440 |
| KMT2C | chr7 | 151904456 | 151904579 | LRP1B | chr2 | 141773429 | 141773524 |
| KMT2C | chr7 | 151917489 | 151917617 | LRP1B | chr2 | 141777384 | 141777511 |
| KMT2C | chr7 | 151917590 | 151917705 | LRP1B | chr2 | 141777500 | 141777581 |
| KMT2C | chr7 | 151917694 | 151917772 | LRP1B | chr2 | 141777570 | 141777677 |
| KMT2C | chr7 | 151917761 | 151917870 | LRP1B | chr2 | 141806479 | 141806601 |
| KMT2C | chr7 | 151918992 | 151919104 | LRP1B | chr2 | 141806590 | 141806700 |
| KMT2C | chr7 | 151919093 | 151919170 | LRP1B | chr2 | 141806689 | 141806801 |
| KMT2C | chr7 | 151919161 | 151919257 | LRP1B | chr2 | 141812611 | 141812733 |
| KMT2C | chr7 | 151919592 | 151919708 | LRP1B | chr2 | 141812722 | 141812840 |
| KMT2C | chr7 | 151919697 | 151919817 | LRP1B | chr2 | 141816391 | 141816510 |
| KMT2C | chr7 | 151921010 | 151921125 | LRP1B | chr2 | 141816471 | 141816570 |
| KMT2C | chr7 | 151921114 | 151921217 | LRP1B | chr2 | 141819533 | 141819653 |
| KMT2C | chr7 | 151921206 | 151921314 | LRP1B | chr2 | 141819642 | 141819771 |



|       |      |           |           |       |       |           |           |
|-------|------|-----------|-----------|-------|-------|-----------|-----------|
| KMT2C | chr7 | 151921464 | 151921572 | LRP1B | chr2  | 141819760 | 141819852 |
| KMT2C | chr7 | 151921561 | 151921677 | LRP1B | chr2  | 141945935 | 141946054 |
| KMT2C | chr7 | 151921666 | 151921766 | LRP1B | chr2  | 141946043 | 141946162 |
| KMT2C | chr7 | 151926944 | 151927044 | LRP1B | chr2  | 141986656 | 141986779 |
| KMT2C | chr7 | 151927033 | 151927143 | LRP1B | chr2  | 141986768 | 141986885 |
| KMT2C | chr7 | 151927132 | 151927201 | LRP1B | chr2  | 141986873 | 141986988 |
| KMT2C | chr7 | 151927242 | 151927350 | LRP1B | chr2  | 141986977 | 141987039 |
| KMT2C | chr7 | 151927339 | 151927457 | LRP1B | chr2  | 142004702 | 142004827 |
| KMT2C | chr7 | 151932843 | 151932929 | LRP1B | chr2  | 142004816 | 142004933 |
| KMT2C | chr7 | 151932926 | 151933017 | LRP1B | chr2  | 142012075 | 142012163 |
| KMT2C | chr7 | 151933005 | 151933096 | LRP1B | chr2  | 142012152 | 142012255 |
| KMT2C | chr7 | 151935708 | 151935828 | LRP1B | chr2  | 142237849 | 142237969 |
| KMT2C | chr7 | 151935815 | 151935911 | LRP1B | chr2  | 142237958 | 142238048 |
| KMT2C | chr7 | 151935900 | 151935972 | LRP1B | chr2  | 142238037 | 142238156 |
| KMT2C | chr7 | 151944907 | 151945027 | LRP1B | chr2  | 142567837 | 142567956 |
| KMT2C | chr7 | 151945016 | 151945145 | LRP1B | chr2  | 142567945 | 142568022 |
| KMT2C | chr7 | 151945134 | 151945259 | LRP1B | chr2  | 142888142 | 142888269 |
| KMT2C | chr7 | 151945249 | 151945363 | LRP1B | chr2  | 142888258 | 142888381 |
| KMT2C | chr7 | 151945352 | 151945469 | MEN1  | chr11 | 64571750  | 64571860  |
| KMT2C | chr7 | 151945458 | 151945565 | MEN1  | chr11 | 64571849  | 64571980  |
| KMT2C | chr7 | 151945554 | 151945676 | MEN1  | chr11 | 64572152  | 64572267  |
| KMT2C | chr7 | 151945665 | 151945774 | MEN1  | chr11 | 64572445  | 64572533  |
| KMT2C | chr7 | 151946891 | 151946999 | MEN1  | chr11 | 64572520  | 64572605  |
| KMT2C | chr7 | 151946988 | 151947088 | MEN1  | chr11 | 64572598  | 64572692  |
| KMT2C | chr7 | 151947845 | 151947934 | MEN1  | chr11 | 64573114  | 64573235  |
| KMT2C | chr7 | 151947923 | 151948014 | MEN1  | chr11 | 64573224  | 64573351  |
| KMT2C | chr7 | 151948003 | 151948120 | MEN1  | chr11 | 64573650  | 64573750  |
| KMT2C | chr7 | 151948914 | 151949005 | MEN1  | chr11 | 64573717  | 64573817  |
| KMT2C | chr7 | 151948991 | 151949110 | MEN1  | chr11 | 64573815  | 64573932  |
| KMT2C | chr7 | 151949100 | 151949225 | MEN1  | chr11 | 64574459  | 64574580  |
| KMT2C | chr7 | 151949571 | 151949666 | MEN1  | chr11 | 64574592  | 64574708  |
| KMT2C | chr7 | 151949655 | 151949753 | MEN1  | chr11 | 64574984  | 64575090  |
| KMT2C | chr7 | 151949742 | 151949855 | MEN1  | chr11 | 64575080  | 64575162  |
| KMT2C | chr7 | 151960049 | 151960173 | MEN1  | chr11 | 64575329  | 64575457  |
| KMT2C | chr7 | 151960163 | 151960274 | MEN1  | chr11 | 64575446  | 64575546  |
| KMT2C | chr7 | 151962065 | 151962152 | MEN1  | chr11 | 64577079  | 64577199  |
| KMT2C | chr7 | 151962141 | 151962267 | MEN1  | chr11 | 64577188  | 64577322  |
| KMT2C | chr7 | 151962254 | 151962352 | MEN1  | chr11 | 64577280  | 64577416  |
| KMT2C | chr7 | 151970720 | 151970822 | MEN1  | chr11 | 64577410  | 64577548  |
| KMT2C | chr7 | 151970811 | 151970935 | MEN1  | chr11 | 64577540  | 64577659  |

|        |       |           |           |       |       |          |          |
|--------|-------|-----------|-----------|-------|-------|----------|----------|
| KMT2C  | chr7  | 151970924 | 151971036 | NCAM2 | chr21 | 22370845 | 22370949 |
| KMT2C  | chr7  | 152006965 | 152007081 | NCAM2 | chr21 | 22652883 | 22652989 |
| KMT2C  | chr7  | 152007070 | 152007150 | NCAM2 | chr21 | 22656402 | 22656514 |
| KMT2C  | chr7  | 152007139 | 152007261 | NCAM2 | chr21 | 22656510 | 22656588 |
| KMT2C  | chr7  | 152008743 | 152008865 | NCAM2 | chr21 | 22656577 | 22656647 |
| KMT2C  | chr7  | 152008859 | 152008935 | NCAM2 | chr21 | 22656636 | 22656747 |
| KMT2C  | chr7  | 152008924 | 152009007 | NCAM2 | chr21 | 22658551 | 22658645 |
| KMT2C  | chr7  | 152008996 | 152009086 | NCAM2 | chr21 | 22658634 | 22658747 |
| KMT2C  | chr7  | 152012123 | 152012248 | NCAM2 | chr21 | 22664376 | 22664481 |
| KMT2C  | chr7  | 152012237 | 152012348 | NCAM2 | chr21 | 22664470 | 22664582 |
| KMT2C  | chr7  | 152012337 | 152012442 | NCAM2 | chr21 | 22696620 | 22696743 |
| KMT2C  | chr7  | 152012431 | 152012512 | NCAM2 | chr21 | 22696732 | 22696847 |
| KMT2C  | chr7  | 152027600 | 152027727 | NCAM2 | chr21 | 22707810 | 22707895 |
| KMT2C  | chr7  | 152027716 | 152027838 | NCAM2 | chr21 | 22707884 | 22707996 |
| KMT2C  | chr7  | 152027827 | 152027939 | NCAM2 | chr21 | 22710652 | 22710738 |
| KMT2C  | chr7  | 152055619 | 152055710 | NCAM2 | chr21 | 22710727 | 22710797 |
| KMT2C  | chr7  | 152055699 | 152055812 | NCAM2 | chr21 | 22710786 | 22710879 |
| KMT2C  | chr7  | 152132719 | 152132848 | NCAM2 | chr21 | 22746140 | 22746267 |
| KMT2C  | chr7  | 152132753 | 152132885 | NCAM2 | chr21 | 22746256 | 22746371 |
| PTEN   | chr10 | 89624204  | 89624323  | NCAM2 | chr21 | 22782524 | 22782634 |
| PTEN   | chr10 | 89653752  | 89653818  | NCAM2 | chr21 | 22782641 | 22782703 |
| PTEN   | chr10 | 89653817  | 89653930  | NCAM2 | chr21 | 22782692 | 22782763 |
| PTEN   | chr10 | 89685245  | 89685357  | NCAM2 | chr21 | 22790771 | 22790869 |
| PTEN   | chr10 | 89690820  | 89690917  | NCAM2 | chr21 | 22790858 | 22790952 |
| PTEN   | chr10 | 89692714  | 89692819  | NCAM2 | chr21 | 22804394 | 22804515 |
| PTEN   | chr10 | 89692820  | 89692920  | NCAM2 | chr21 | 22804503 | 22804613 |
| PTEN   | chr10 | 89692921  | 89693032  | NCAM2 | chr21 | 22838869 | 22838963 |
| PTEN   | chr10 | 89711803  | 89711928  | NCAM2 | chr21 | 22838952 | 22839069 |
| PTEN   | chr10 | 89711917  | 89712027  | NCAM2 | chr21 | 22840961 | 22841032 |
| PTEN   | chr10 | 89717580  | 89717695  | NCAM2 | chr21 | 22841021 | 22841139 |
| PTEN   | chr10 | 89717695  | 89717792  | NCAM2 | chr21 | 22849494 | 22849618 |
| PTEN   | chr10 | 89720564  | 89720686  | NCAM2 | chr21 | 22849612 | 22849698 |
| PTEN   | chr10 | 89720693  | 89720769  | NCAM2 | chr21 | 22849687 | 22849764 |
| PTEN   | chr10 | 89720770  | 89720842  | NCAM2 | chr21 | 22849753 | 22849833 |
| PTEN   | chr10 | 89724949  | 89725061  | NCAM2 | chr21 | 22881048 | 22881174 |
| PTEN   | chr10 | 89725059  | 89725147  | NCAM2 | chr21 | 22881187 | 22881286 |
| PTEN   | chr10 | 89725120  | 89725240  | NCAM2 | chr21 | 22881275 | 22881387 |
| PTPRZ1 | chr7  | 121513512 | 121513648 | NCAM2 | chr21 | 22906777 | 22906891 |
| PTPRZ1 | chr7  | 121568117 | 121568234 | NCAM2 | chr21 | 22906880 | 22906990 |
| PTPRZ1 | chr7  | 121568234 | 121568341 | NCAM2 | chr21 | 22910090 | 22910190 |

|        |      |           |           |        |       |           |           |
|--------|------|-----------|-----------|--------|-------|-----------|-----------|
| PTPRZ1 | chr7 | 121608011 | 121608124 | NCAM2  | chr21 | 22910188  | 22910294  |
| PTPRZ1 | chr7 | 121608066 | 121608153 | NOTCH2 | chr1  | 120457827 | 120457943 |
| PTPRZ1 | chr7 | 121612580 | 121612652 | NOTCH2 | chr1  | 120457929 | 120458056 |
| PTPRZ1 | chr7 | 121612652 | 121612746 | NOTCH2 | chr1  | 120458045 | 120458148 |
| PTPRZ1 | chr7 | 121616196 | 121616276 | NOTCH2 | chr1  | 120458115 | 120458236 |
| PTPRZ1 | chr7 | 121616274 | 121616394 | NOTCH2 | chr1  | 120458228 | 120458308 |
| PTPRZ1 | chr7 | 121616860 | 121616956 | NOTCH2 | chr1  | 120458327 | 120458457 |
| PTPRZ1 | chr7 | 121623655 | 121623743 | NOTCH2 | chr1  | 120458437 | 120458553 |
| PTPRZ1 | chr7 | 121623743 | 121623846 | NOTCH2 | chr1  | 120458543 | 120458649 |
| PTPRZ1 | chr7 | 121623846 | 121623967 | NOTCH2 | chr1  | 120458629 | 120458738 |
| PTPRZ1 | chr7 | 121623992 | 121624085 | NOTCH2 | chr1  | 120458734 | 120458862 |
| PTPRZ1 | chr7 | 121624085 | 121624198 | NOTCH2 | chr1  | 120458852 | 120458934 |
| PTPRZ1 | chr7 | 121636409 | 121636485 | NOTCH2 | chr1  | 120458923 | 120459031 |
| PTPRZ1 | chr7 | 121636485 | 121636599 | NOTCH2 | chr1  | 120459020 | 120459141 |
| PTPRZ1 | chr7 | 121636599 | 121636714 | NOTCH2 | chr1  | 120459122 | 120459240 |
| PTPRZ1 | chr7 | 121637889 | 121637970 | NOTCH2 | chr1  | 120459229 | 120459333 |
| PTPRZ1 | chr7 | 121637961 | 121638033 | NOTCH2 | chr1  | 120460236 | 120460366 |
| PTPRZ1 | chr7 | 121638033 | 121638129 | NOTCH2 | chr1  | 120460355 | 120460435 |
| PTPRZ1 | chr7 | 121644631 | 121644753 | NOTCH2 | chr1  | 120460945 | 120461060 |
| PTPRZ1 | chr7 | 121650302 | 121650428 | NOTCH2 | chr1  | 120461049 | 120461152 |
| PTPRZ1 | chr7 | 121650428 | 121650554 | NOTCH2 | chr1  | 120461141 | 120461211 |
| PTPRZ1 | chr7 | 121650554 | 121650683 | NOTCH2 | chr1  | 120461919 | 120462003 |
| PTPRZ1 | chr7 | 121650681 | 121650800 | NOTCH2 | chr1  | 120461949 | 120462078 |
| PTPRZ1 | chr7 | 121650790 | 121650886 | NOTCH2 | chr1  | 120462044 | 120462151 |
| PTPRZ1 | chr7 | 121650886 | 121651008 | NOTCH2 | chr1  | 120462140 | 120462250 |
| PTPRZ1 | chr7 | 121651008 | 121651112 | NOTCH2 | chr1  | 120462799 | 120462929 |
| PTPRZ1 | chr7 | 121651112 | 121651221 | NOTCH2 | chr1  | 120462884 | 120462984 |
| PTPRZ1 | chr7 | 121651219 | 121651344 | NOTCH2 | chr1  | 120464234 | 120464357 |
| PTPRZ1 | chr7 | 121651344 | 121651422 | NOTCH2 | chr1  | 120464346 | 120464458 |
| PTPRZ1 | chr7 | 121651422 | 121651503 | NOTCH2 | chr1  | 120464818 | 120464920 |
| PTPRZ1 | chr7 | 121651503 | 121651628 | NOTCH2 | chr1  | 120464916 | 120464994 |
| PTPRZ1 | chr7 | 121651628 | 121651754 | NOTCH2 | chr1  | 120464983 | 120465081 |
| PTPRZ1 | chr7 | 121651752 | 121651835 | NOTCH2 | chr1  | 120465150 | 120465267 |
| PTPRZ1 | chr7 | 121651834 | 121651956 | NOTCH2 | chr1  | 120465259 | 120465372 |
| PTPRZ1 | chr7 | 121651956 | 121652044 | NOTCH2 | chr1  | 120465361 | 120465440 |
| PTPRZ1 | chr7 | 121652044 | 121652156 | NOTCH2 | chr1  | 120466205 | 120466320 |
| PTPRZ1 | chr7 | 121652156 | 121652279 | NOTCH2 | chr1  | 120466316 | 120466444 |
| PTPRZ1 | chr7 | 121652279 | 121652369 | NOTCH2 | chr1  | 120466466 | 120466564 |
| PTPRZ1 | chr7 | 121652369 | 121652496 | NOTCH2 | chr1  | 120466553 | 120466632 |
| PTPRZ1 | chr7 | 121652496 | 121652572 | NOTCH2 | chr1  | 120467885 | 120468012 |

|        |      |           |           |        |      |           |           |
|--------|------|-----------|-----------|--------|------|-----------|-----------|
| PTPRZ1 | chr7 | 121652572 | 121652702 | NOTCH2 | chr1 | 120468003 | 120468136 |
| PTPRZ1 | chr7 | 121652700 | 121652818 | NOTCH2 | chr1 | 120468125 | 120468231 |
| PTPRZ1 | chr7 | 121652818 | 121652920 | NOTCH2 | chr1 | 120468210 | 120468296 |
| PTPRZ1 | chr7 | 121652920 | 121653019 | NOTCH2 | chr1 | 120468322 | 120468443 |
| PTPRZ1 | chr7 | 121653015 | 121653135 | NOTCH2 | chr1 | 120469009 | 120469132 |
| PTPRZ1 | chr7 | 121653135 | 121653250 | NOTCH2 | chr1 | 120469121 | 120469202 |
| PTPRZ1 | chr7 | 121653241 | 121653319 | NOTCH2 | chr1 | 120471564 | 120471688 |
| PTPRZ1 | chr7 | 121653319 | 121653429 | NOTCH2 | chr1 | 120471655 | 120471771 |
| PTPRZ1 | chr7 | 121653459 | 121653580 | NOTCH2 | chr1 | 120471759 | 120471861 |
| PTPRZ1 | chr7 | 121653580 | 121653652 | NOTCH2 | chr1 | 120477990 | 120478111 |
| PTPRZ1 | chr7 | 121653652 | 121653762 | NOTCH2 | chr1 | 120478096 | 120478169 |
| PTPRZ1 | chr7 | 121653762 | 121653887 | NOTCH2 | chr1 | 120478158 | 120478244 |
| PTPRZ1 | chr7 | 121653887 | 121653965 | NOTCH2 | chr1 | 120479848 | 120479922 |
| PTPRZ1 | chr7 | 121659105 | 121659187 | NOTCH2 | chr1 | 120479917 | 120480016 |
| PTPRZ1 | chr7 | 121659187 | 121659280 | NOTCH2 | chr1 | 120480005 | 120480102 |
| PTPRZ1 | chr7 | 121659280 | 121659407 | NOTCH2 | chr1 | 120480435 | 120480539 |
| PTPRZ1 | chr7 | 121668565 | 121668657 | NOTCH2 | chr1 | 120480528 | 120480622 |
| PTPRZ1 | chr7 | 121668657 | 121668737 | NOTCH2 | chr1 | 120480622 | 120480723 |
| PTPRZ1 | chr7 | 121671478 | 121671545 | NOTCH2 | chr1 | 120483071 | 120483182 |
| PTPRZ1 | chr7 | 121671558 | 121671681 | NOTCH2 | chr1 | 120483172 | 120483277 |
| PTPRZ1 | chr7 | 121674152 | 121674274 | NOTCH2 | chr1 | 120483266 | 120483389 |
| PTPRZ1 | chr7 | 121674284 | 121674356 | NOTCH2 | chr1 | 120484069 | 120484176 |
| PTPRZ1 | chr7 | 121674356 | 121674446 | NOTCH2 | chr1 | 120484165 | 120484274 |
| PTPRZ1 | chr7 | 121676624 | 121676696 | NOTCH2 | chr1 | 120484263 | 120484387 |
| PTPRZ1 | chr7 | 121676696 | 121676798 | NOTCH2 | chr1 | 120490931 | 120491044 |
| PTPRZ1 | chr7 | 121678749 | 121678827 | NOTCH2 | chr1 | 120491033 | 120491116 |
| PTPRZ1 | chr7 | 121678826 | 121678905 | NOTCH2 | chr1 | 120491105 | 120491202 |
| PTPRZ1 | chr7 | 121678903 | 121679006 | NOTCH2 | chr1 | 120491561 | 120491687 |
| PTPRZ1 | chr7 | 121679469 | 121679565 | NOTCH2 | chr1 | 120491676 | 120491789 |
| PTPRZ1 | chr7 | 121679565 | 121679651 | NOTCH2 | chr1 | 120493297 | 120493400 |
| PTPRZ1 | chr7 | 121680781 | 121680910 | NOTCH2 | chr1 | 120493389 | 120493477 |
| PTPRZ1 | chr7 | 121680910 | 121681040 | NOTCH2 | chr1 | 120496152 | 120496247 |
| PTPRZ1 | chr7 | 121682562 | 121682686 | NOTCH2 | chr1 | 120496236 | 120496354 |
| PTPRZ1 | chr7 | 121682672 | 121682749 | NOTCH2 | chr1 | 120497601 | 120497699 |
| PTPRZ1 | chr7 | 121684394 | 121684516 | NOTCH2 | chr1 | 120497688 | 120497813 |
| PTPRZ1 | chr7 | 121684516 | 121684630 | NOTCH2 | chr1 | 120497801 | 120497878 |
| PTPRZ1 | chr7 | 121691486 | 121691561 | NOTCH2 | chr1 | 120501905 | 120502029 |
| PTPRZ1 | chr7 | 121691561 | 121691636 | NOTCH2 | chr1 | 120502018 | 120502135 |
| PTPRZ1 | chr7 | 121691833 | 121691938 | NOTCH2 | chr1 | 120506097 | 120506225 |
| PTPRZ1 | chr7 | 121691938 | 121692026 | NOTCH2 | chr1 | 120506200 | 120506322 |

|        |       |           |           |        |      |           |           |
|--------|-------|-----------|-----------|--------|------|-----------|-----------|
| PTPRZ1 | chr7  | 121693933 | 121694016 | NOTCH2 | chr1 | 120506306 | 120506419 |
| PTPRZ1 | chr7  | 121694016 | 121694101 | NOTCH2 | chr1 | 120506408 | 120506484 |
| PTPRZ1 | chr7  | 121694920 | 121695042 | NOTCH2 | chr1 | 120508019 | 120508126 |
| PTPRZ1 | chr7  | 121695023 | 121695114 | NOTCH2 | chr1 | 120508115 | 120508200 |
| PTPRZ1 | chr7  | 121695089 | 121695195 | NOTCH2 | chr1 | 120508939 | 120509045 |
| PTPRZ1 | chr7  | 121698807 | 121698891 | NOTCH2 | chr1 | 120509034 | 120509123 |
| PTPRZ1 | chr7  | 121698891 | 121699008 | NOTCH2 | chr1 | 120510029 | 120510158 |
| PTPRZ1 | chr7  | 121699725 | 121699835 | NOTCH2 | chr1 | 120510147 | 120510254 |
| PTPRZ1 | chr7  | 121699835 | 121699947 | NOTCH2 | chr1 | 120510581 | 120510708 |
| PTPRZ1 | chr7  | 121701048 | 121701175 | NOTCH2 | chr1 | 120510697 | 120510821 |
| PTPRZ1 | chr7  | 121701175 | 121701292 | NOTCH2 | chr1 | 120510782 | 120510871 |
| RAI1   | chr17 | 17696149  | 17696271  | NOTCH2 | chr1 | 120512086 | 120512210 |
| RAI1   | chr17 | 17696268  | 17696373  | NOTCH2 | chr1 | 120512133 | 120512262 |
| RAI1   | chr17 | 17696354  | 17696435  | NOTCH2 | chr1 | 120512251 | 120512375 |
| RAI1   | chr17 | 17696429  | 17696558  | NOTCH2 | chr1 | 120512363 | 120512441 |
| RAI1   | chr17 | 17696495  | 17696599  | NOTCH2 | chr1 | 120529543 | 120529672 |
| RAI1   | chr17 | 17696598  | 17696720  | NOTCH2 | chr1 | 120529661 | 120529762 |
| RAI1   | chr17 | 17696714  | 17696833  | NOTCH2 | chr1 | 120539521 | 120539630 |
| RAI1   | chr17 | 17696832  | 17696961  | NOTCH2 | chr1 | 120539619 | 120539701 |
| RAI1   | chr17 | 17696946  | 17697059  | NOTCH2 | chr1 | 120539689 | 120539817 |
| RAI1   | chr17 | 17697059  | 17697193  | NOTCH2 | chr1 | 120539816 | 120539937 |
| RAI1   | chr17 | 17697193  | 17697329  | NOTCH2 | chr1 | 120539925 | 120540008 |
| RAI1   | chr17 | 17697329  | 17697422  | NOTCH2 | chr1 | 120547928 | 120548049 |
| RAI1   | chr17 | 17697422  | 17697532  | NOTCH2 | chr1 | 120548038 | 120548141 |
| RAI1   | chr17 | 17697531  | 17697649  | NOTCH2 | chr1 | 120548190 | 120548268 |
| RAI1   | chr17 | 17697649  | 17697740  | NOTCH2 | chr1 | 120572504 | 120572620 |
| RAI1   | chr17 | 17697729  | 17697849  | PCLO   | chr7 | 82387785  | 82387910  |
| RAI1   | chr17 | 17697848  | 17697978  | PCLO   | chr7 | 82387899  | 82387992  |
| RAI1   | chr17 | 17697977  | 17698105  | PCLO   | chr7 | 82387981  | 82388104  |
| RAI1   | chr17 | 17698097  | 17698190  | PCLO   | chr7 | 82389855  | 82389970  |
| RAI1   | chr17 | 17698190  | 17698318  | PCLO   | chr7 | 82389978  | 82390098  |
| RAI1   | chr17 | 17698310  | 17698441  | PCLO   | chr7 | 82390635  | 82390720  |
| RAI1   | chr17 | 17698440  | 17698559  | PCLO   | chr7 | 82390704  | 82390792  |
| RAI1   | chr17 | 17698559  | 17698686  | PCLO   | chr7 | 82390792  | 82390905  |
| RAI1   | chr17 | 17698679  | 17698815  | PCLO   | chr7 | 82430818  | 82430935  |
| RAI1   | chr17 | 17698811  | 17698947  | PCLO   | chr7 | 82434951  | 82435049  |
| RAI1   | chr17 | 17698943  | 17699066  | PCLO   | chr7 | 82435031  | 82435149  |
| RAI1   | chr17 | 17699066  | 17699182  | PCLO   | chr7 | 82451773  | 82451893  |
| RAI1   | chr17 | 17699177  | 17699313  | PCLO   | chr7 | 82451828  | 82451947  |
| RAI1   | chr17 | 17699309  | 17699438  | PCLO   | chr7 | 82451936  | 82452044  |

|       |       |          |          |      |      |          |          |
|-------|-------|----------|----------|------|------|----------|----------|
| RAI1  | chr17 | 17699437 | 17699546 | PCLO | chr7 | 82453509 | 82453580 |
| RAI1  | chr17 | 17699543 | 17699646 | PCLO | chr7 | 82453569 | 82453684 |
| RAI1  | chr17 | 17699645 | 17699777 | PCLO | chr7 | 82453699 | 82453816 |
| RAI1  | chr17 | 17699735 | 17699817 | PCLO | chr7 | 82455837 | 82455947 |
| RAI1  | chr17 | 17699911 | 17700028 | PCLO | chr7 | 82455945 | 82456060 |
| RAI1  | chr17 | 17700025 | 17700154 | PCLO | chr7 | 82457113 | 82457214 |
| RAI1  | chr17 | 17700141 | 17700262 | PCLO | chr7 | 82457202 | 82457276 |
| RAI1  | chr17 | 17700261 | 17700349 | PCLO | chr7 | 82464929 | 82465045 |
| RAI1  | chr17 | 17700340 | 17700467 | PCLO | chr7 | 82467434 | 82467553 |
| RAI1  | chr17 | 17700467 | 17700591 | PCLO | chr7 | 82467542 | 82467652 |
| RAI1  | chr17 | 17700551 | 17700651 | PCLO | chr7 | 82467667 | 82467755 |
| RAI1  | chr17 | 17700641 | 17700754 | PCLO | chr7 | 82470717 | 82470807 |
| RAI1  | chr17 | 17700754 | 17700871 | PCLO | chr7 | 82470796 | 82470868 |
| RAI1  | chr17 | 17700869 | 17700984 | PCLO | chr7 | 82474574 | 82474682 |
| RAI1  | chr17 | 17700984 | 17701112 | PCLO | chr7 | 82474671 | 82474788 |
| RAI1  | chr17 | 17701106 | 17701219 | PCLO | chr7 | 82474777 | 82474850 |
| RAI1  | chr17 | 17701219 | 17701344 | PCLO | chr7 | 82475827 | 82475903 |
| RAI1  | chr17 | 17701322 | 17701398 | PCLO | chr7 | 82475892 | 82475976 |
| RAI1  | chr17 | 17701397 | 17701481 | PCLO | chr7 | 82476374 | 82476481 |
| RAI1  | chr17 | 17701479 | 17701616 | PCLO | chr7 | 82476470 | 82476584 |
| RAI1  | chr17 | 17701615 | 17701720 | PCLO | chr7 | 82508584 | 82508708 |
| RAI1  | chr17 | 17701691 | 17701818 | PCLO | chr7 | 82508707 | 82508816 |
| RAI1  | chr17 | 17701815 | 17701900 | PCLO | chr7 | 82531979 | 82532081 |
| RAI1  | chr17 | 17707047 | 17707179 | PCLO | chr7 | 82538138 | 82538233 |
| RAI1  | chr17 | 17712680 | 17712784 | PCLO | chr7 | 82538222 | 82538339 |
| RAI1  | chr17 | 17713243 | 17713348 | PCLO | chr7 | 82543902 | 82544021 |
| SETD2 | chr3  | 47058484 | 47058600 | PCLO | chr7 | 82544010 | 82544139 |
| SETD2 | chr3  | 47058592 | 47058693 | PCLO | chr7 | 82544128 | 82544238 |
| SETD2 | chr3  | 47058682 | 47058775 | PCLO | chr7 | 82544227 | 82544307 |
| SETD2 | chr3  | 47058748 | 47058844 | PCLO | chr7 | 82544296 | 82544385 |
| SETD2 | chr3  | 47059029 | 47059158 | PCLO | chr7 | 82544374 | 82544482 |
| SETD2 | chr3  | 47059147 | 47059253 | PCLO | chr7 | 82544471 | 82544559 |
| SETD2 | chr3  | 47059247 | 47059328 | PCLO | chr7 | 82544548 | 82544653 |
| SETD2 | chr3  | 47061145 | 47061275 | PCLO | chr7 | 82544642 | 82544763 |
| SETD2 | chr3  | 47061264 | 47061389 | PCLO | chr7 | 82544748 | 82544822 |
| SETD2 | chr3  | 47079043 | 47079163 | PCLO | chr7 | 82544811 | 82544932 |
| SETD2 | chr3  | 47079152 | 47079274 | PCLO | chr7 | 82544921 | 82545046 |
| SETD2 | chr3  | 47079263 | 47079365 | PCLO | chr7 | 82545035 | 82545132 |
| SETD2 | chr3  | 47083949 | 47084063 | PCLO | chr7 | 82545121 | 82545242 |
| SETD2 | chr3  | 47084052 | 47084154 | PCLO | chr7 | 82545231 | 82545350 |

|       |      |          |          |      |      |          |          |
|-------|------|----------|----------|------|------|----------|----------|
| SETD2 | chr3 | 47084140 | 47084240 | PCLO | chr7 | 82545339 | 82545443 |
| SETD2 | chr3 | 47087906 | 47088000 | PCLO | chr7 | 82545432 | 82545545 |
| SETD2 | chr3 | 47087985 | 47088078 | PCLO | chr7 | 82545534 | 82545661 |
| SETD2 | chr3 | 47088067 | 47088161 | PCLO | chr7 | 82545650 | 82545771 |
| SETD2 | chr3 | 47098236 | 47098339 | PCLO | chr7 | 82545760 | 82545861 |
| SETD2 | chr3 | 47098328 | 47098444 | PCLO | chr7 | 82545850 | 82545962 |
| SETD2 | chr3 | 47098433 | 47098550 | PCLO | chr7 | 82545951 | 82546072 |
| SETD2 | chr3 | 47098539 | 47098660 | PCLO | chr7 | 82546061 | 82546168 |
| SETD2 | chr3 | 47098649 | 47098773 | PCLO | chr7 | 82546166 | 82546283 |
| SETD2 | chr3 | 47098764 | 47098887 | PCLO | chr7 | 82578717 | 82578803 |
| SETD2 | chr3 | 47098873 | 47098982 | PCLO | chr7 | 82578792 | 82578911 |
| SETD2 | chr3 | 47098957 | 47099049 | PCLO | chr7 | 82578900 | 82579013 |
| SETD2 | chr3 | 47103562 | 47103645 | PCLO | chr7 | 82579002 | 82579128 |
| SETD2 | chr3 | 47103619 | 47103731 | PCLO | chr7 | 82579117 | 82579218 |
| SETD2 | chr3 | 47103720 | 47103825 | PCLO | chr7 | 82579207 | 82579328 |
| SETD2 | chr3 | 47103814 | 47103888 | PCLO | chr7 | 82579317 | 82579443 |
| SETD2 | chr3 | 47108507 | 47108587 | PCLO | chr7 | 82579432 | 82579558 |
| SETD2 | chr3 | 47108576 | 47108658 | PCLO | chr7 | 82579547 | 82579666 |
| SETD2 | chr3 | 47125057 | 47125181 | PCLO | chr7 | 82579655 | 82579779 |
| SETD2 | chr3 | 47125170 | 47125249 | PCLO | chr7 | 82579768 | 82579878 |
| SETD2 | chr3 | 47125238 | 47125344 | PCLO | chr7 | 82579867 | 82579995 |
| SETD2 | chr3 | 47125333 | 47125445 | PCLO | chr7 | 82579981 | 82580081 |
| SETD2 | chr3 | 47125434 | 47125561 | PCLO | chr7 | 82580070 | 82580193 |
| SETD2 | chr3 | 47125550 | 47125667 | PCLO | chr7 | 82580182 | 82580291 |
| SETD2 | chr3 | 47125656 | 47125781 | PCLO | chr7 | 82580280 | 82580396 |
| SETD2 | chr3 | 47125769 | 47125890 | PCLO | chr7 | 82580385 | 82580511 |
| SETD2 | chr3 | 47127537 | 47127654 | PCLO | chr7 | 82580500 | 82580613 |
| SETD2 | chr3 | 47127643 | 47127762 | PCLO | chr7 | 82580602 | 82580726 |
| SETD2 | chr3 | 47127751 | 47127854 | PCLO | chr7 | 82580715 | 82580818 |
| SETD2 | chr3 | 47129568 | 47129664 | PCLO | chr7 | 82581134 | 82581252 |
| SETD2 | chr3 | 47129653 | 47129731 | PCLO | chr7 | 82581238 | 82581346 |
| SETD2 | chr3 | 47129720 | 47129794 | PCLO | chr7 | 82581335 | 82581441 |
| SETD2 | chr3 | 47139351 | 47139471 | PCLO | chr7 | 82581430 | 82581545 |
| SETD2 | chr3 | 47139460 | 47139570 | PCLO | chr7 | 82581534 | 82581655 |
| SETD2 | chr3 | 47139559 | 47139635 | PCLO | chr7 | 82581644 | 82581770 |
| SETD2 | chr3 | 47142824 | 47142936 | PCLO | chr7 | 82581759 | 82581867 |
| SETD2 | chr3 | 47142932 | 47143041 | PCLO | chr7 | 82581856 | 82581982 |
| SETD2 | chr3 | 47143031 | 47143134 | PCLO | chr7 | 82581971 | 82582092 |
| SETD2 | chr3 | 47144769 | 47144882 | PCLO | chr7 | 82582081 | 82582206 |
| SETD2 | chr3 | 47144871 | 47144963 | PCLO | chr7 | 82582195 | 82582316 |

|       |      |          |          |      |      |          |          |
|-------|------|----------|----------|------|------|----------|----------|
| SETD2 | chr3 | 47147438 | 47147521 | PCLO | chr7 | 82582302 | 82582416 |
| SETD2 | chr3 | 47147510 | 47147629 | PCLO | chr7 | 82582405 | 82582531 |
| SETD2 | chr3 | 47147618 | 47147741 | PCLO | chr7 | 82582520 | 82582637 |
| SETD2 | chr3 | 47155378 | 47155473 | PCLO | chr7 | 82582626 | 82582739 |
| SETD2 | chr3 | 47155462 | 47155531 | PCLO | chr7 | 82582728 | 82582847 |
| SETD2 | chr3 | 47158019 | 47158110 | PCLO | chr7 | 82582836 | 82582950 |
| SETD2 | chr3 | 47158099 | 47158203 | PCLO | chr7 | 82582939 | 82583053 |
| SETD2 | chr3 | 47158198 | 47158314 | PCLO | chr7 | 82583084 | 82583179 |
| SETD2 | chr3 | 47161615 | 47161736 | PCLO | chr7 | 82583168 | 82583288 |
| SETD2 | chr3 | 47161728 | 47161812 | PCLO | chr7 | 82583277 | 82583389 |
| SETD2 | chr3 | 47161784 | 47161885 | PCLO | chr7 | 82583378 | 82583471 |
| SETD2 | chr3 | 47161873 | 47162002 | PCLO | chr7 | 82583450 | 82583548 |
| SETD2 | chr3 | 47161993 | 47162097 | PCLO | chr7 | 82583537 | 82583656 |
| SETD2 | chr3 | 47162086 | 47162210 | PCLO | chr7 | 82583645 | 82583769 |
| SETD2 | chr3 | 47162199 | 47162309 | PCLO | chr7 | 82583758 | 82583881 |
| SETD2 | chr3 | 47162298 | 47162425 | PCLO | chr7 | 82583870 | 82583950 |
| SETD2 | chr3 | 47162414 | 47162538 | PCLO | chr7 | 82583939 | 82584057 |
| SETD2 | chr3 | 47162527 | 47162626 | PCLO | chr7 | 82584046 | 82584166 |
| SETD2 | chr3 | 47162615 | 47162723 | PCLO | chr7 | 82584155 | 82584272 |
| SETD2 | chr3 | 47162712 | 47162826 | PCLO | chr7 | 82584261 | 82584361 |
| SETD2 | chr3 | 47162815 | 47162933 | PCLO | chr7 | 82584350 | 82584469 |
| SETD2 | chr3 | 47162922 | 47163046 | PCLO | chr7 | 82584458 | 82584574 |
| SETD2 | chr3 | 47163035 | 47163133 | PCLO | chr7 | 82584563 | 82584648 |
| SETD2 | chr3 | 47163122 | 47163204 | PCLO | chr7 | 82584632 | 82584711 |
| SETD2 | chr3 | 47163193 | 47163311 | PCLO | chr7 | 82584700 | 82584813 |
| SETD2 | chr3 | 47163300 | 47163425 | PCLO | chr7 | 82584802 | 82584923 |
| SETD2 | chr3 | 47163414 | 47163522 | PCLO | chr7 | 82584912 | 82585037 |
| SETD2 | chr3 | 47163511 | 47163615 | PCLO | chr7 | 82585026 | 82585132 |
| SETD2 | chr3 | 47163582 | 47163660 | PCLO | chr7 | 82585121 | 82585209 |
| SETD2 | chr3 | 47163729 | 47163849 | PCLO | chr7 | 82585198 | 82585289 |
| SETD2 | chr3 | 47163838 | 47163957 | PCLO | chr7 | 82585278 | 82585386 |
| SETD2 | chr3 | 47163946 | 47164071 | PCLO | chr7 | 82585375 | 82585476 |
| SETD2 | chr3 | 47164070 | 47164184 | PCLO | chr7 | 82585465 | 82585557 |
| SETD2 | chr3 | 47164155 | 47164250 | PCLO | chr7 | 82585546 | 82585668 |
| SETD2 | chr3 | 47164239 | 47164322 | PCLO | chr7 | 82585657 | 82585780 |
| SETD2 | chr3 | 47164311 | 47164422 | PCLO | chr7 | 82585769 | 82585885 |
| SETD2 | chr3 | 47164377 | 47164480 | PCLO | chr7 | 82585874 | 82585993 |
| SETD2 | chr3 | 47164574 | 47164658 | PCLO | chr7 | 82585982 | 82586091 |
| SETD2 | chr3 | 47164647 | 47164731 | PCLO | chr7 | 82586080 | 82586169 |
| SETD2 | chr3 | 47164720 | 47164847 | PCLO | chr7 | 82586158 | 82586279 |



|         |      |           |           |      |      |          |          |
|---------|------|-----------|-----------|------|------|----------|----------|
| SETD2   | chr3 | 47164836  | 47164932  | PCLO | chr7 | 82595068 | 82595170 |
| SETD2   | chr3 | 47164919  | 47165042  | PCLO | chr7 | 82595159 | 82595241 |
| SETD2   | chr3 | 47165031  | 47165113  | PCLO | chr7 | 82595230 | 82595355 |
| SETD2   | chr3 | 47165102  | 47165219  | PCLO | chr7 | 82595354 | 82595482 |
| SETD2   | chr3 | 47165208  | 47165297  | PCLO | chr7 | 82595472 | 82595564 |
| SETD2   | chr3 | 47165286  | 47165395  | PCLO | chr7 | 82595547 | 82595619 |
| SETD2   | chr3 | 47165384  | 47165495  | PCLO | chr7 | 82595675 | 82595779 |
| SETD2   | chr3 | 47165482  | 47165603  | PCLO | chr7 | 82595768 | 82595886 |
| SETD2   | chr3 | 47165592  | 47165690  | PCLO | chr7 | 82763512 | 82763631 |
| SETD2   | chr3 | 47165679  | 47165769  | PCLO | chr7 | 82763620 | 82763738 |
| SETD2   | chr3 | 47165758  | 47165869  | PCLO | chr7 | 82763727 | 82763837 |
| SETD2   | chr3 | 47165858  | 47165984  | PCLO | chr7 | 82763825 | 82763933 |
| SETD2   | chr3 | 47165973  | 47166088  | PCLO | chr7 | 82763899 | 82764018 |
| SETD2   | chr3 | 47168064  | 47168163  | PCLO | chr7 | 82764007 | 82764125 |
| SETD2   | chr3 | 47168162  | 47168237  | PCLO | chr7 | 82764114 | 82764244 |
| SMARCA1 | chrX | 128581070 | 128581171 | PCLO | chr7 | 82764257 | 82764384 |
| SMARCA1 | chrX | 128581160 | 128581255 | PCLO | chr7 | 82764374 | 82764490 |
| SMARCA1 | chrX | 128581244 | 128581340 | PCLO | chr7 | 82764479 | 82764557 |
| SMARCA1 | chrX | 128582181 | 128582304 | PCLO | chr7 | 82764546 | 82764672 |
| SMARCA1 | chrX | 128582293 | 128582377 | PCLO | chr7 | 82764661 | 82764759 |
| SMARCA1 | chrX | 128582366 | 128582447 | PCLO | chr7 | 82764748 | 82764867 |
| SMARCA1 | chrX | 128582435 | 128582512 | PCLO | chr7 | 82764859 | 82764983 |
| SMARCA1 | chrX | 128599405 | 128599502 | PCLO | chr7 | 82783989 | 82784111 |
| SMARCA1 | chrX | 128599491 | 128599574 | PCLO | chr7 | 82784100 | 82784226 |
| SMARCA1 | chrX | 128599563 | 128599668 | PCLO | chr7 | 82784215 | 82784331 |
| SMARCA1 | chrX | 128599657 | 128599759 | PCLO | chr7 | 82784555 | 82784660 |
| SMARCA1 | chrX | 128599758 | 128599842 | PCLO | chr7 | 82784649 | 82784745 |
| SMARCA1 | chrX | 128599831 | 128599910 | PCLO | chr7 | 82784696 | 82784808 |
| SMARCA1 | chrX | 128599899 | 128600016 | PCLO | chr7 | 82784794 | 82784904 |
| SMARCA1 | chrX | 128602695 | 128602804 | PCLO | chr7 | 82784925 | 82785044 |
| SMARCA1 | chrX | 128602793 | 128602911 | PCLO | chr7 | 82785034 | 82785149 |
| SMARCA1 | chrX | 128602900 | 128603011 | PCLO | chr7 | 82785138 | 82785221 |
| SMARCA1 | chrX | 128605094 | 128605219 | PCLO | chr7 | 82785210 | 82785314 |
| SMARCA1 | chrX | 128605208 | 128605286 | PCLO | chr7 | 82785303 | 82785388 |
| SMARCA1 | chrX | 128605282 | 128605405 | PCLO | chr7 | 82785377 | 82785494 |
| SMARCA1 | chrX | 128614586 | 128614709 | PCLO | chr7 | 82785483 | 82785583 |
| SMARCA1 | chrX | 128614698 | 128614785 | PCLO | chr7 | 82785572 | 82785693 |
| SMARCA1 | chrX | 128614774 | 128614886 | PCLO | chr7 | 82785703 | 82785818 |
| SMARCA1 | chrX | 128614921 | 128615017 | PCLO | chr7 | 82791623 | 82791757 |
| SMARCA1 | chrX | 128615006 | 128615107 | PCLO | chr7 | 82791757 | 82791885 |

|         |      |           |           |        |      |           |           |
|---------|------|-----------|-----------|--------|------|-----------|-----------|
| SMARCA1 | chrX | 128615096 | 128615212 | PSIP1  | chr9 | 15465496  | 15465599  |
| SMARCA1 | chrX | 128620883 | 128620973 | PSIP1  | chr9 | 15466690  | 15466796  |
| SMARCA1 | chrX | 128620969 | 128621084 | PSIP1  | chr9 | 15466785  | 15466906  |
| SMARCA1 | chrX | 128621107 | 128621191 | PSIP1  | chr9 | 15468592  | 15468718  |
| SMARCA1 | chrX | 128622822 | 128622936 | PSIP1  | chr9 | 15468707  | 15468830  |
| SMARCA1 | chrX | 128622924 | 128623041 | PSIP1  | chr9 | 15468819  | 15468913  |
| SMARCA1 | chrX | 128623036 | 128623148 | PSIP1  | chr9 | 15468943  | 15469030  |
| SMARCA1 | chrX | 128623926 | 128624034 | PSIP1  | chr9 | 15469019  | 15469136  |
| SMARCA1 | chrX | 128623995 | 128624090 | PSIP1  | chr9 | 15469173  | 15469295  |
| SMARCA1 | chrX | 128624143 | 128624264 | PSIP1  | chr9 | 15469288  | 15469353  |
| SMARCA1 | chrX | 128625793 | 128625913 | PSIP1  | chr9 | 15469822  | 15469942  |
| SMARCA1 | chrX | 128625902 | 128626008 | PSIP1  | chr9 | 15469939  | 15470010  |
| SMARCA1 | chrX | 128625997 | 128626120 | PSIP1  | chr9 | 15471154  | 15471277  |
| SMARCA1 | chrX | 128626930 | 128627055 | PSIP1  | chr9 | 15472601  | 15472711  |
| SMARCA1 | chrX | 128627017 | 128627131 | PSIP1  | chr9 | 15472672  | 15472778  |
| SMARCA1 | chrX | 128630632 | 128630753 | PSIP1  | chr9 | 15474022  | 15474137  |
| SMARCA1 | chrX | 128630742 | 128630821 | PSIP1  | chr9 | 15474136  | 15474244  |
| SMARCA1 | chrX | 128630810 | 128630917 | PSIP1  | chr9 | 15474238  | 15474318  |
| SMARCA1 | chrX | 128631730 | 128631850 | PSIP1  | chr9 | 15478424  | 15478540  |
| SMARCA1 | chrX | 128631839 | 128631915 | PSIP1  | chr9 | 15479538  | 15479662  |
| SMARCA1 | chrX | 128631904 | 128631984 | PSIP1  | chr9 | 15479596  | 15479706  |
| SMARCA1 | chrX | 128631973 | 128632098 | PSIP1  | chr9 | 15485945  | 15486040  |
| SMARCA1 | chrX | 128633595 | 128633714 | PSIP1  | chr9 | 15486017  | 15486104  |
| SMARCA1 | chrX | 128633713 | 128633783 | PSIP1  | chr9 | 15486780  | 15486872  |
| SMARCA1 | chrX | 128633772 | 128633886 | PSIP1  | chr9 | 15486846  | 15486927  |
| SMARCA1 | chrX | 128638618 | 128638733 | PSIP1  | chr9 | 15486935  | 15487057  |
| SMARCA1 | chrX | 128638722 | 128638830 | PSIP1  | chr9 | 15489938  | 15490039  |
| SMARCA1 | chrX | 128639945 | 128640034 | PSIP1  | chr9 | 15490028  | 15490136  |
| SMARCA1 | chrX | 128640023 | 128640121 | PSIP1  | chr9 | 15506517  | 15506605  |
| SMARCA1 | chrX | 128640110 | 128640230 | PSIP1  | chr9 | 15506577  | 15506695  |
| SMARCA1 | chrX | 128640198 | 128640300 | PSIP1  | chr9 | 15510056  | 15510176  |
| SMARCA1 | chrX | 128641840 | 128641963 | PSIP1  | chr9 | 15510192  | 15510324  |
| SMARCA1 | chrX | 128641958 | 128642052 | PTPRZ1 | chr7 | 121513512 | 121513635 |
| SMARCA1 | chrX | 128642041 | 128642161 | PTPRZ1 | chr7 | 121568122 | 121568245 |
| SMARCA1 | chrX | 128645711 | 128645803 | PTPRZ1 | chr7 | 121568234 | 121568339 |
| SMARCA1 | chrX | 128645792 | 128645916 | PTPRZ1 | chr7 | 121607881 | 121607998 |
| SMARCA1 | chrX | 128645905 | 128646022 | PTPRZ1 | chr7 | 121608002 | 121608104 |
| SMARCA1 | chrX | 128649579 | 128649665 | PTPRZ1 | chr7 | 121608082 | 121608182 |
| SMARCA1 | chrX | 128649654 | 128649771 | PTPRZ1 | chr7 | 121608179 | 121608290 |
| SMARCA1 | chrX | 128649749 | 128649833 | PTPRZ1 | chr7 | 121612577 | 121612649 |

|         |      |           |           |        |      |           |           |
|---------|------|-----------|-----------|--------|------|-----------|-----------|
| SMARCA1 | chrX | 128649882 | 128649990 | PTPRZ1 | chr7 | 121612638 | 121612751 |
| SMARCA1 | chrX | 128649979 | 128650055 | PTPRZ1 | chr7 | 121616180 | 121616288 |
| SMARCA1 | chrX | 128650214 | 128650322 | PTPRZ1 | chr7 | 121616277 | 121616389 |
| SMARCA1 | chrX | 128650311 | 128650433 | PTPRZ1 | chr7 | 121616853 | 121616927 |
| SMARCA1 | chrX | 128650422 | 128650540 | PTPRZ1 | chr7 | 121623651 | 121623746 |
| SMARCA1 | chrX | 128652324 | 128652390 | PTPRZ1 | chr7 | 121623735 | 121623850 |
| SMARCA1 | chrX | 128652379 | 128652474 | PTPRZ1 | chr7 | 121623839 | 121623953 |
| SMARCA1 | chrX | 128657146 | 128657270 | PTPRZ1 | chr7 | 121623983 | 121624081 |
| SMARCA1 | chrX | 128657157 | 128657285 | PTPRZ1 | chr7 | 121624070 | 121624187 |
| SMARCA2 | chr9 | 2028866   | 2028994   | PTPRZ1 | chr7 | 121636409 | 121636491 |
| SMARCA2 | chr9 | 2028994   | 2029094   | PTPRZ1 | chr7 | 121636480 | 121636561 |
| SMARCA2 | chr9 | 2029051   | 2029165   | PTPRZ1 | chr7 | 121636550 | 121636669 |
| SMARCA2 | chr9 | 2029154   | 2029251   | PTPRZ1 | chr7 | 121637888 | 121638008 |
| SMARCA2 | chr9 | 2029240   | 2029327   | PTPRZ1 | chr7 | 121637997 | 121638113 |
| SMARCA2 | chr9 | 2032876   | 2032976   | PTPRZ1 | chr7 | 121644631 | 121644751 |
| SMARCA2 | chr9 | 2032965   | 2033054   | PTPRZ1 | chr7 | 121650287 | 121650407 |
| SMARCA2 | chr9 | 2033023   | 2033115   | PTPRZ1 | chr7 | 121650396 | 121650519 |
| SMARCA2 | chr9 | 2039375   | 2039460   | PTPRZ1 | chr7 | 121650508 | 121650626 |
| SMARCA2 | chr9 | 2039449   | 2039538   | PTPRZ1 | chr7 | 121650615 | 121650729 |
| SMARCA2 | chr9 | 2039527   | 2039647   | PTPRZ1 | chr7 | 121650718 | 121650836 |
| SMARCA2 | chr9 | 2039636   | 2039733   | PTPRZ1 | chr7 | 121650825 | 121650932 |
| SMARCA2 | chr9 | 2039723   | 2039843   | PTPRZ1 | chr7 | 121650921 | 121651039 |
| SMARCA2 | chr9 | 2039766   | 2039896   | PTPRZ1 | chr7 | 121651028 | 121651148 |
| SMARCA2 | chr9 | 2039894   | 2039994   | PTPRZ1 | chr7 | 121651137 | 121651259 |
| SMARCA2 | chr9 | 2047087   | 2047207   | PTPRZ1 | chr7 | 121651248 | 121651370 |
| SMARCA2 | chr9 | 2047449   | 2047559   | PTPRZ1 | chr7 | 121651359 | 121651487 |
| SMARCA2 | chr9 | 2054524   | 2054647   | PTPRZ1 | chr7 | 121651476 | 121651578 |
| SMARCA2 | chr9 | 2054636   | 2054706   | PTPRZ1 | chr7 | 121651567 | 121651692 |
| SMARCA2 | chr9 | 2054695   | 2054773   | PTPRZ1 | chr7 | 121651671 | 121651776 |
| SMARCA2 | chr9 | 2056601   | 2056723   | PTPRZ1 | chr7 | 121651765 | 121651876 |
| SMARCA2 | chr9 | 2056679   | 2056803   | PTPRZ1 | chr7 | 121651865 | 121651967 |
| SMARCA2 | chr9 | 2056826   | 2056912   | PTPRZ1 | chr7 | 121651956 | 121652082 |
| SMARCA2 | chr9 | 2058206   | 2058324   | PTPRZ1 | chr7 | 121652065 | 121652181 |
| SMARCA2 | chr9 | 2058313   | 2058431   | PTPRZ1 | chr7 | 121652170 | 121652281 |
| SMARCA2 | chr9 | 2058420   | 2058514   | PTPRZ1 | chr7 | 121652270 | 121652393 |
| SMARCA2 | chr9 | 2060715   | 2060840   | PTPRZ1 | chr7 | 121652382 | 121652492 |
| SMARCA2 | chr9 | 2060829   | 2060949   | PTPRZ1 | chr7 | 121652481 | 121652585 |
| SMARCA2 | chr9 | 2060937   | 2061037   | PTPRZ1 | chr7 | 121652574 | 121652685 |
| SMARCA2 | chr9 | 2070354   | 2070463   | PTPRZ1 | chr7 | 121652674 | 121652802 |
| SMARCA2 | chr9 | 2070432   | 2070522   | PTPRZ1 | chr7 | 121652791 | 121652907 |

|         |      |         |         |        |      |           |           |
|---------|------|---------|---------|--------|------|-----------|-----------|
| SMARCA2 | chr9 | 2073083 | 2073212 | PTPRZ1 | chr7 | 121652896 | 121653017 |
| SMARCA2 | chr9 | 2073201 | 2073325 | PTPRZ1 | chr7 | 121653006 | 121653132 |
| SMARCA2 | chr9 | 2073280 | 2073397 | PTPRZ1 | chr7 | 121653122 | 121653196 |
| SMARCA2 | chr9 | 2073453 | 2073578 | PTPRZ1 | chr7 | 121653280 | 121653399 |
| SMARCA2 | chr9 | 2073567 | 2073673 | PTPRZ1 | chr7 | 121653355 | 121653473 |
| SMARCA2 | chr9 | 2076162 | 2076275 | PTPRZ1 | chr7 | 121653462 | 121653585 |
| SMARCA2 | chr9 | 2076264 | 2076387 | PTPRZ1 | chr7 | 121653580 | 121653645 |
| SMARCA2 | chr9 | 2077549 | 2077647 | PTPRZ1 | chr7 | 121653634 | 121653756 |
| SMARCA2 | chr9 | 2077636 | 2077748 | PTPRZ1 | chr7 | 121653745 | 121653853 |
| SMARCA2 | chr9 | 2077737 | 2077826 | PTPRZ1 | chr7 | 121653842 | 121653953 |
| SMARCA2 | chr9 | 2081726 | 2081845 | PTPRZ1 | chr7 | 121659136 | 121659260 |
| SMARCA2 | chr9 | 2081834 | 2081933 | PTPRZ1 | chr7 | 121659249 | 121659358 |
| SMARCA2 | chr9 | 2081922 | 2082029 | PTPRZ1 | chr7 | 121668545 | 121668651 |
| SMARCA2 | chr9 | 2082018 | 2082090 | PTPRZ1 | chr7 | 121668640 | 121668715 |
| SMARCA2 | chr9 | 2083269 | 2083378 | PTPRZ1 | chr7 | 121671459 | 121671553 |
| SMARCA2 | chr9 | 2083367 | 2083465 | PTPRZ1 | chr7 | 121671542 | 121671663 |
| SMARCA2 | chr9 | 2083957 | 2084073 | PTPRZ1 | chr7 | 121674109 | 121674187 |
| SMARCA2 | chr9 | 2084062 | 2084167 | PTPRZ1 | chr7 | 121674303 | 121674390 |
| SMARCA2 | chr9 | 2084156 | 2084246 | PTPRZ1 | chr7 | 121674378 | 121674451 |
| SMARCA2 | chr9 | 2086741 | 2086864 | PTPRZ1 | chr7 | 121676624 | 121676696 |
| SMARCA2 | chr9 | 2086853 | 2086954 | PTPRZ1 | chr7 | 121676685 | 121676796 |
| SMARCA2 | chr9 | 2086943 | 2087020 | PTPRZ1 | chr7 | 121678749 | 121678848 |
| SMARCA2 | chr9 | 2087009 | 2087121 | PTPRZ1 | chr7 | 121678837 | 121678906 |
| SMARCA2 | chr9 | 2088428 | 2088520 | PTPRZ1 | chr7 | 121679453 | 121679576 |
| SMARCA2 | chr9 | 2088509 | 2088590 | PTPRZ1 | chr7 | 121679565 | 121679652 |
| SMARCA2 | chr9 | 2088579 | 2088663 | PTPRZ1 | chr7 | 121680852 | 121680931 |
| SMARCA2 | chr9 | 2096600 | 2096727 | PTPRZ1 | chr7 | 121680920 | 121681044 |
| SMARCA2 | chr9 | 2096716 | 2096817 | PTPRZ1 | chr7 | 121682566 | 121682682 |
| SMARCA2 | chr9 | 2097302 | 2097417 | PTPRZ1 | chr7 | 121682671 | 121682747 |
| SMARCA2 | chr9 | 2097406 | 2097486 | PTPRZ1 | chr7 | 121682736 | 121682831 |
| SMARCA2 | chr9 | 2097475 | 2097586 | PTPRZ1 | chr7 | 121684364 | 121684485 |
| SMARCA2 | chr9 | 2101510 | 2101603 | PTPRZ1 | chr7 | 121684474 | 121684544 |
| SMARCA2 | chr9 | 2101591 | 2101666 | PTPRZ1 | chr7 | 121684533 | 121684632 |
| SMARCA2 | chr9 | 2103932 | 2104027 | PTPRZ1 | chr7 | 121691396 | 121691511 |
| SMARCA2 | chr9 | 2104016 | 2104104 | PTPRZ1 | chr7 | 121691500 | 121691619 |
| SMARCA2 | chr9 | 2104093 | 2104219 | PTPRZ1 | chr7 | 121691855 | 121691937 |
| SMARCA2 | chr9 | 2110162 | 2110285 | PTPRZ1 | chr7 | 121691926 | 121692024 |
| SMARCA2 | chr9 | 2110274 | 2110380 | PTPRZ1 | chr7 | 121693943 | 121694031 |
| SMARCA2 | chr9 | 2110369 | 2110477 | PTPRZ1 | chr7 | 121694020 | 121694102 |
| SMARCA2 | chr9 | 2115667 | 2115788 | PTPRZ1 | chr7 | 121694903 | 121695004 |

|         |      |         |         |        |       |           |           |
|---------|------|---------|---------|--------|-------|-----------|-----------|
| SMARCA2 | chr9 | 2115777 | 2115903 | PTPRZ1 | chr7  | 121694993 | 121695111 |
| SMARCA2 | chr9 | 2115898 | 2115979 | PTPRZ1 | chr7  | 121695099 | 121695187 |
| SMARCA2 | chr9 | 2115964 | 2116074 | PTPRZ1 | chr7  | 121698763 | 121698893 |
| SMARCA2 | chr9 | 2119393 | 2119507 | PTPRZ1 | chr7  | 121698884 | 121699006 |
| SMARCA2 | chr9 | 2119496 | 2119623 | PTPRZ1 | chr7  | 121699744 | 121699864 |
| SMARCA2 | chr9 | 2123581 | 2123701 | PTPRZ1 | chr7  | 121699853 | 121699973 |
| SMARCA2 | chr9 | 2123690 | 2123803 | PTPRZ1 | chr7  | 121701056 | 121701185 |
| SMARCA2 | chr9 | 2123792 | 2123920 | PTPRZ1 | chr7  | 121701174 | 121701291 |
| SMARCA2 | chr9 | 2123873 | 2123961 | RIN3   | chr14 | 92980289  | 92980382  |
| SMARCA2 | chr9 | 2157748 | 2157868 | RIN3   | chr14 | 93022079  | 93022204  |
| SMARCA2 | chr9 | 2157835 | 2157951 | RIN3   | chr14 | 93022189  | 93022313  |
| SMARCA2 | chr9 | 2158883 | 2158968 | RIN3   | chr14 | 93043668  | 93043789  |
| SMARCA2 | chr9 | 2158957 | 2159069 | RIN3   | chr14 | 93043778  | 93043883  |
| SMARCA2 | chr9 | 2159715 | 2159837 | RIN3   | chr14 | 93081717  | 93081844  |
| SMARCA2 | chr9 | 2159826 | 2159931 | RIN3   | chr14 | 93107553  | 93107673  |
| SMARCA2 | chr9 | 2159920 | 2159995 | RIN3   | chr14 | 93107683  | 93107812  |
| SMARCA2 | chr9 | 2161551 | 2161666 | RIN3   | chr14 | 93117832  | 93117942  |
| SMARCA2 | chr9 | 2161658 | 2161772 | RIN3   | chr14 | 93117931  | 93118060  |
| SMARCA2 | chr9 | 2161761 | 2161880 | RIN3   | chr14 | 93118058  | 93118154  |
| SMARCA2 | chr9 | 2161868 | 2161970 | RIN3   | chr14 | 93118421  | 93118518  |
| SMARCA2 | chr9 | 2170358 | 2170458 | RIN3   | chr14 | 93118474  | 93118580  |
| SMARCA2 | chr9 | 2170447 | 2170526 | RIN3   | chr14 | 93118580  | 93118716  |
| SMARCA2 | chr9 | 2181426 | 2181549 | RIN3   | chr14 | 93118721  | 93118824  |
| SMARCA2 | chr9 | 2181538 | 2181639 | RIN3   | chr14 | 93118808  | 93118896  |
| SMARCA2 | chr9 | 2181628 | 2181726 | RIN3   | chr14 | 93118872  | 93118990  |
| SMARCA2 | chr9 | 2182048 | 2182153 | RIN3   | chr14 | 93118979  | 93119092  |
| SMARCA2 | chr9 | 2182142 | 2182240 | RIN3   | chr14 | 93119048  | 93119179  |
| SMARCA2 | chr9 | 2182219 | 2182313 | RIN3   | chr14 | 93119167  | 93119255  |
| SMARCA2 | chr9 | 2185961 | 2186080 | RIN3   | chr14 | 93119217  | 93119342  |
| SMARCA2 | chr9 | 2186069 | 2186172 | RIN3   | chr14 | 93119331  | 93119464  |
| SMARCA2 | chr9 | 2186161 | 2186278 | RIN3   | chr14 | 93125382  | 93125507  |
| SMARCA2 | chr9 | 2191128 | 2191250 | RIN3   | chr14 | 93125498  | 93125612  |
| SMARCA2 | chr9 | 2191239 | 2191318 | RIN3   | chr14 | 93125601  | 93125729  |
| SMARCA2 | chr9 | 2191386 | 2191483 | RIN3   | chr14 | 93125718  | 93125847  |
| SMARCA2 | chr9 | 2192608 | 2192733 | RIN3   | chr14 | 93142789  | 93142888  |
| SMARCA2 | chr9 | 2192722 | 2192793 | RIN3   | chr14 | 93142870  | 93142970  |
| SMARCA2 | chr9 | 2029010 | 2029139 | RIN3   | chr14 | 93151312  | 93151412  |
| SMARCA2 | chr9 | 2029138 | 2029254 | RIN3   | chr14 | 93151395  | 93151490  |
| SMARCA2 | chr9 | 2032876 | 2033001 | RIN3   | chr14 | 93151469  | 93151563  |
| SMARCA2 | chr9 | 2033000 | 2033116 | RIN3   | chr14 | 93154166  | 93154279  |

|         |      |         |         |        |       |           |           |
|---------|------|---------|---------|--------|-------|-----------|-----------|
| SMARCA2 | chr9 | 2039379 | 2039506 | RIN3   | chr14 | 93154277  | 93154369  |
| SMARCA2 | chr9 | 2039497 | 2039627 | RIN3   | chr14 | 93154476  | 93154578  |
| SMARCA2 | chr9 | 2039627 | 2039736 | RIN3   | chr14 | 93154598  | 93154690  |
| SMARCA2 | chr9 | 2039892 | 2040002 | SPHKAP | chr2  | 228846386 | 228846507 |
| SMARCA2 | chr9 | 2047433 | 2047566 | SPHKAP | chr2  | 228846496 | 228846618 |
| SMARCA2 | chr9 | 2054507 | 2054619 | SPHKAP | chr2  | 228855613 | 228855729 |
| SMARCA2 | chr9 | 2054619 | 2054702 | SPHKAP | chr2  | 228855718 | 228855830 |
| SMARCA2 | chr9 | 2054702 | 2054780 | SPHKAP | chr2  | 228855789 | 228855910 |
| SMARCA2 | chr9 | 2056663 | 2056791 | SPHKAP | chr2  | 228855945 | 228856065 |
| SMARCA2 | chr9 | 2056791 | 2056900 | SPHKAP | chr2  | 228858229 | 228858356 |
| SMARCA2 | chr9 | 2058251 | 2058370 | SPHKAP | chr2  | 228860146 | 228860271 |
| SMARCA2 | chr9 | 2058367 | 2058480 | SPHKAP | chr2  | 228860265 | 228860393 |
| SMARCA2 | chr9 | 2060767 | 2060880 | SPHKAP | chr2  | 228860393 | 228860476 |
| SMARCA2 | chr9 | 2060880 | 2060991 | SPHKAP | chr2  | 228881079 | 228881191 |
| SMARCA2 | chr9 | 2070370 | 2070500 | SPHKAP | chr2  | 228881180 | 228881292 |
| SMARCA2 | chr9 | 2073192 | 2073292 | SPHKAP | chr2  | 228881281 | 228881400 |
| SMARCA2 | chr9 | 2073286 | 2073388 | SPHKAP | chr2  | 228881389 | 228881466 |
| SMARCA2 | chr9 | 2073553 | 2073687 | SPHKAP | chr2  | 228881455 | 228881557 |
| SMARCA2 | chr9 | 2076173 | 2076246 | SPHKAP | chr2  | 228881543 | 228881648 |
| SMARCA2 | chr9 | 2076246 | 2076349 | SPHKAP | chr2  | 228881637 | 228881751 |
| SMARCA2 | chr9 | 2077606 | 2077733 | SPHKAP | chr2  | 228881740 | 228881838 |
| SMARCA2 | chr9 | 2077733 | 2077820 | SPHKAP | chr2  | 228881824 | 228881954 |
| SMARCA2 | chr9 | 2081775 | 2081896 | SPHKAP | chr2  | 228881950 | 228882074 |
| SMARCA2 | chr9 | 2081896 | 2082002 | SPHKAP | chr2  | 228882063 | 228882183 |
| SMARCA2 | chr9 | 2083257 | 2083364 | SPHKAP | chr2  | 228882172 | 228882298 |
| SMARCA2 | chr9 | 2083364 | 2083467 | SPHKAP | chr2  | 228882285 | 228882402 |
| SMARCA2 | chr9 | 2083996 | 2084125 | SPHKAP | chr2  | 228882432 | 228882549 |
| SMARCA2 | chr9 | 2084125 | 2084235 | SPHKAP | chr2  | 228882538 | 228882647 |
| SMARCA2 | chr9 | 2086773 | 2086892 | SPHKAP | chr2  | 228882636 | 228882720 |
| SMARCA2 | chr9 | 2086892 | 2087007 | SPHKAP | chr2  | 228882709 | 228882808 |
| SMARCA2 | chr9 | 2087007 | 2087103 | SPHKAP | chr2  | 228882797 | 228882924 |
| SMARCA2 | chr9 | 2088423 | 2088523 | SPHKAP | chr2  | 228882913 | 228883033 |
| SMARCA2 | chr9 | 2088514 | 2088598 | SPHKAP | chr2  | 228883022 | 228883110 |
| SMARCA2 | chr9 | 2088598 | 2088672 | SPHKAP | chr2  | 228883099 | 228883201 |
| SMARCA2 | chr9 | 2096647 | 2096774 | SPHKAP | chr2  | 228883190 | 228883271 |
| SMARCA2 | chr9 | 2097303 | 2097423 | SPHKAP | chr2  | 228883256 | 228883357 |
| SMARCA2 | chr9 | 2097414 | 2097486 | SPHKAP | chr2  | 228883346 | 228883429 |
| SMARCA2 | chr9 | 2101507 | 2101582 | SPHKAP | chr2  | 228883418 | 228883533 |
| SMARCA2 | chr9 | 2101581 | 2101652 | SPHKAP | chr2  | 228883522 | 228883628 |
| SMARCA2 | chr9 | 2103946 | 2104050 | SPHKAP | chr2  | 228883617 | 228883739 |

|         |      |           |           |        |      |           |           |
|---------|------|-----------|-----------|--------|------|-----------|-----------|
| SMARCA2 | chr9 | 2104050   | 2104176   | SPHKAP | chr2 | 228883701 | 228883823 |
| SMARCA2 | chr9 | 2110211   | 2110323   | SPHKAP | chr2 | 228883847 | 228883926 |
| SMARCA2 | chr9 | 2110323   | 2110447   | SPHKAP | chr2 | 228883912 | 228884030 |
| SMARCA2 | chr9 | 2115779   | 2115885   | SPHKAP | chr2 | 228884019 | 228884127 |
| SMARCA2 | chr9 | 2115880   | 2115968   | SPHKAP | chr2 | 228884116 | 228884229 |
| SMARCA2 | chr9 | 2115961   | 2116065   | SPHKAP | chr2 | 228884218 | 228884302 |
| SMARCA2 | chr9 | 2119436   | 2119555   | SPHKAP | chr2 | 228884291 | 228884405 |
| SMARCA2 | chr9 | 2123691   | 2123813   | SPHKAP | chr2 | 228884394 | 228884471 |
| SMARCA2 | chr9 | 2123813   | 2123944   | SPHKAP | chr2 | 228884460 | 228884560 |
| SMARCA2 | chr9 | 2161672   | 2161794   | SPHKAP | chr2 | 228884549 | 228884671 |
| SMARCA2 | chr9 | 2161792   | 2161908   | SPHKAP | chr2 | 228884660 | 228884789 |
| SMARCA2 | chr9 | 2170306   | 2170431   | SPHKAP | chr2 | 228884778 | 228884893 |
| SMARCA2 | chr9 | 2170443   | 2170552   | SPHKAP | chr2 | 228886377 | 228886498 |
| SMARCA2 | chr9 | 2181516   | 2181584   | SPHKAP | chr2 | 228886487 | 228886600 |
| SMARCA2 | chr9 | 2181586   | 2181715   | SPHKAP | chr2 | 228886589 | 228886692 |
| SMARCA2 | chr9 | 2182108   | 2182236   | SPHKAP | chr2 | 228890061 | 228890161 |
| SMARCA2 | chr9 | 2182236   | 2182356   | SPHKAP | chr2 | 228890150 | 228890271 |
| SMARCA2 | chr9 | 2186029   | 2186128   | SPHKAP | chr2 | 228892172 | 228892284 |
| SMARCA2 | chr9 | 2186128   | 2186238   | SPHKAP | chr2 | 228973490 | 228973558 |
| SMARCA2 | chr9 | 2191245   | 2191372   | SPHKAP | chr2 | 228973547 | 228973665 |
| SMARCA2 | chr9 | 2191372   | 2191483   | SPHKAP | chr2 | 228996569 | 228996699 |
| SMARCA2 | chr9 | 2192636   | 2192760   | SPHKAP | chr2 | 228996695 | 228996812 |
| SMARCA3 | chr3 | 148749925 | 148750031 | SPHKAP | chr2 | 229046228 | 229046359 |
| SMARCA3 | chr3 | 148750007 | 148750120 | TDRD7  | chr9 | 100190710 | 100190782 |
| SMARCA3 | chr3 | 148750109 | 148750228 | TDRD7  | chr9 | 100190771 | 100190866 |
| SMARCA3 | chr3 | 148752607 | 148752727 | TDRD7  | chr9 | 100190855 | 100190975 |
| SMARCA3 | chr3 | 148752726 | 148752793 | TDRD7  | chr9 | 100193151 | 100193270 |
| SMARCA3 | chr3 | 148752782 | 148752869 | TDRD7  | chr9 | 100193259 | 100193367 |
| SMARCA3 | chr3 | 148756843 | 148756915 | TDRD7  | chr9 | 100194294 | 100194365 |
| SMARCA3 | chr3 | 148756904 | 148756986 | TDRD7  | chr9 | 100194354 | 100194443 |
| SMARCA3 | chr3 | 148756975 | 148757086 | TDRD7  | chr9 | 100194432 | 100194530 |
| SMARCA3 | chr3 | 148757283 | 148757384 | TDRD7  | chr9 | 100201461 | 100201578 |
| SMARCA3 | chr3 | 148757373 | 148757457 | TDRD7  | chr9 | 100201574 | 100201666 |
| SMARCA3 | chr3 | 148757443 | 148757558 | TDRD7  | chr9 | 100203912 | 100203992 |
| SMARCA3 | chr3 | 148757711 | 148757829 | TDRD7  | chr9 | 100203977 | 100204047 |
| SMARCA3 | chr3 | 148757818 | 148757901 | TDRD7  | chr9 | 100204141 | 100204245 |
| SMARCA3 | chr3 | 148757946 | 148758069 | TDRD7  | chr9 | 100222412 | 100222533 |
| SMARCA3 | chr3 | 148759199 | 148759267 | TDRD7  | chr9 | 100222522 | 100222648 |
| SMARCA3 | chr3 | 148759256 | 148759326 | TDRD7  | chr9 | 100222637 | 100222749 |
| SMARCA3 | chr3 | 148759315 | 148759420 | TDRD7  | chr9 | 100222738 | 100222860 |

|         |      |           |           |        |      |           |           |
|---------|------|-----------|-----------|--------|------|-----------|-----------|
| SMARCA3 | chr3 | 148759409 | 148759512 | TDRD7  | chr9 | 100222850 | 100222979 |
| SMARCA3 | chr3 | 148759849 | 148759966 | TDRD7  | chr9 | 100222969 | 100223083 |
| SMARCA3 | chr3 | 148759955 | 148760023 | TDRD7  | chr9 | 100227071 | 100227183 |
| SMARCA3 | chr3 | 148763800 | 148763912 | TDRD7  | chr9 | 100227172 | 100227276 |
| SMARCA3 | chr3 | 148763901 | 148764023 | TDRD7  | chr9 | 100227241 | 100227318 |
| SMARCA3 | chr3 | 148764006 | 148764096 | TDRD7  | chr9 | 100232755 | 100232879 |
| SMARCA3 | chr3 | 148765672 | 148765791 | TDRD7  | chr9 | 100232868 | 100232970 |
| SMARCA3 | chr3 | 148765780 | 148765900 | TDRD7  | chr9 | 100234515 | 100234598 |
| SMARCA3 | chr3 | 148765889 | 148766000 | TDRD7  | chr9 | 100234587 | 100234679 |
| SMARCA3 | chr3 | 148766569 | 148766673 | TDRD7  | chr9 | 100234668 | 100234787 |
| SMARCA3 | chr3 | 148766662 | 148766760 | TDRD7  | chr9 | 100235698 | 100235807 |
| SMARCA3 | chr3 | 148766759 | 148766880 | TDRD7  | chr9 | 100235796 | 100235918 |
| SMARCA3 | chr3 | 148767952 | 148768052 | TDRD7  | chr9 | 100237600 | 100237725 |
| SMARCA3 | chr3 | 148768027 | 148768131 | TDRD7  | chr9 | 100237714 | 100237830 |
| SMARCA3 | chr3 | 148768111 | 148768226 | TDRD7  | chr9 | 100240660 | 100240774 |
| SMARCA3 | chr3 | 148772992 | 148773109 | TDRD7  | chr9 | 100240763 | 100240872 |
| SMARCA3 | chr3 | 148773098 | 148773201 | TDRD7  | chr9 | 100243002 | 100243125 |
| SMARCA3 | chr3 | 148773192 | 148773285 | TDRD7  | chr9 | 100243114 | 100243230 |
| SMARCA3 | chr3 | 148777377 | 148777489 | TDRD7  | chr9 | 100245098 | 100245182 |
| SMARCA3 | chr3 | 148777505 | 148777573 | TDRD7  | chr9 | 100245171 | 100245250 |
| SMARCA3 | chr3 | 148777562 | 148777680 | TDRD7  | chr9 | 100245239 | 100245359 |
| SMARCA3 | chr3 | 148778374 | 148778492 | TDRD7  | chr9 | 100245348 | 100245465 |
| SMARCA3 | chr3 | 148778476 | 148778591 | TDRD7  | chr9 | 100245448 | 100245557 |
| SMARCA3 | chr3 | 148778580 | 148778679 | TDRD7  | chr9 | 100245546 | 100245662 |
| SMARCA3 | chr3 | 148778684 | 148778767 | TDRD7  | chr9 | 100249405 | 100249511 |
| SMARCA3 | chr3 | 148781160 | 148781258 | TDRD7  | chr9 | 100249500 | 100249624 |
| SMARCA3 | chr3 | 148781247 | 148781361 | TDRD7  | chr9 | 100257908 | 100258027 |
| SMARCA3 | chr3 | 148782493 | 148782606 | TDRD7  | chr9 | 100258015 | 100258127 |
| SMARCA3 | chr3 | 148782595 | 148782711 | TDRD7  | chr9 | 100258118 | 100258233 |
| SMARCA3 | chr3 | 148785923 | 148786043 | THSD7B | chr2 | 137748419 | 137748544 |
| SMARCA3 | chr3 | 148786032 | 148786136 | THSD7B | chr2 | 137813954 | 137814075 |
| SMARCA3 | chr3 | 148788973 | 148789076 | THSD7B | chr2 | 137814064 | 137814150 |
| SMARCA3 | chr3 | 148789065 | 148789175 | THSD7B | chr2 | 137814135 | 137814216 |
| SMARCA3 | chr3 | 148789164 | 148789280 | THSD7B | chr2 | 137814206 | 137814315 |
| SMARCA3 | chr3 | 148789314 | 148789425 | THSD7B | chr2 | 137814304 | 137814416 |
| SMARCA3 | chr3 | 148789407 | 148789521 | THSD7B | chr2 | 137814405 | 137814525 |
| SMARCA3 | chr3 | 148790930 | 148791007 | THSD7B | chr2 | 137814515 | 137814594 |
| SMARCA3 | chr3 | 148790969 | 148791082 | THSD7B | chr2 | 137814583 | 137814658 |
| SMARCA3 | chr3 | 148791072 | 148791171 | THSD7B | chr2 | 137814647 | 137814762 |
| SMARCA3 | chr3 | 148791912 | 148792032 | THSD7B | chr2 | 137814751 | 137814867 |



|         |       |           |           |        |      |           |           |
|---------|-------|-----------|-----------|--------|------|-----------|-----------|
| SMARCA3 | chr3  | 148792021 | 148792141 | THSD7B | chr2 | 137852396 | 137852484 |
| SMARCA3 | chr3  | 148792130 | 148792237 | THSD7B | chr2 | 137852473 | 137852589 |
| SMARCA3 | chr3  | 148793570 | 148793692 | THSD7B | chr2 | 137852578 | 137852701 |
| SMARCA3 | chr3  | 148793681 | 148793791 | THSD7B | chr2 | 137872594 | 137872715 |
| SMARCA3 | chr3  | 148793780 | 148793889 | THSD7B | chr2 | 137872704 | 137872811 |
| SMARCA3 | chr3  | 148802407 | 148802523 | THSD7B | chr2 | 137917732 | 137917858 |
| SMARCA3 | chr3  | 148802512 | 148802623 | THSD7B | chr2 | 137917850 | 137917960 |
| SMARCA3 | chr3  | 148802612 | 148802727 | THSD7B | chr2 | 137928268 | 137928369 |
| SMARCA3 | chr3  | 148804051 | 148804183 | THSD7B | chr2 | 137928352 | 137928469 |
| SMARCA4 | chr19 | 11094701  | 11094824  | THSD7B | chr2 | 137928458 | 137928537 |
| SMARCA4 | chr19 | 11094877  | 11095009  | THSD7B | chr2 | 137988600 | 137988722 |
| SMARCA4 | chr19 | 11095028  | 11095119  | THSD7B | chr2 | 137988689 | 137988771 |
| SMARCA4 | chr19 | 11095870  | 11095990  | THSD7B | chr2 | 137990390 | 137990520 |
| SMARCA4 | chr19 | 11095972  | 11096098  | THSD7B | chr2 | 137990509 | 137990632 |
| SMARCA4 | chr19 | 11096090  | 11096167  | THSD7B | chr2 | 137990621 | 137990714 |
| SMARCA4 | chr19 | 11096767  | 11096901  | THSD7B | chr2 | 137999974 | 138000094 |
| SMARCA4 | chr19 | 11096903  | 11097018  | THSD7B | chr2 | 138000083 | 138000157 |
| SMARCA4 | chr19 | 11097039  | 11097167  | THSD7B | chr2 | 138030072 | 138030197 |
| SMARCA4 | chr19 | 11097169  | 11097291  | THSD7B | chr2 | 138030186 | 138030285 |
| SMARCA4 | chr19 | 11097274  | 11097389  | THSD7B | chr2 | 138033456 | 138033533 |
| SMARCA4 | chr19 | 11097486  | 11097571  | THSD7B | chr2 | 138033522 | 138033634 |
| SMARCA4 | chr19 | 11097561  | 11097676  | THSD7B | chr2 | 138163088 | 138163211 |
| SMARCA4 | chr19 | 11097701  | 11097786  | THSD7B | chr2 | 138163200 | 138163287 |
| SMARCA4 | chr19 | 11098170  | 11098306  | THSD7B | chr2 | 138163276 | 138163392 |
| SMARCA4 | chr19 | 11098528  | 11098657  | THSD7B | chr2 | 138169139 | 138169257 |
| SMARCA4 | chr19 | 11099892  | 11100010  | THSD7B | chr2 | 138169246 | 138169374 |
| SMARCA4 | chr19 | 11099971  | 11100101  | THSD7B | chr2 | 138169362 | 138169453 |
| SMARCA4 | chr19 | 11100089  | 11100177  | THSD7B | chr2 | 138208358 | 138208449 |
| SMARCA4 | chr19 | 11101749  | 11101880  | THSD7B | chr2 | 138208438 | 138208562 |
| SMARCA4 | chr19 | 11101824  | 11101957  | THSD7B | chr2 | 138208551 | 138208659 |
| SMARCA4 | chr19 | 11101951  | 11102071  | THSD7B | chr2 | 138320702 | 138320823 |
| SMARCA4 | chr19 | 11105426  | 11105507  | THSD7B | chr2 | 138320812 | 138320924 |
| SMARCA4 | chr19 | 11105496  | 11105626  | THSD7B | chr2 | 138320913 | 138320988 |
| SMARCA4 | chr19 | 11105589  | 11105705  | THSD7B | chr2 | 138329871 | 138329982 |
| SMARCA4 | chr19 | 11105694  | 11105780  | THSD7B | chr2 | 138329974 | 138330078 |
| SMARCA4 | chr19 | 11106750  | 11106874  | THSD7B | chr2 | 138330067 | 138330140 |
| SMARCA4 | chr19 | 11106854  | 11106947  | THSD7B | chr2 | 138373722 | 138373844 |
| SMARCA4 | chr19 | 11106935  | 11107041  | THSD7B | chr2 | 138373830 | 138373913 |
| SMARCA4 | chr19 | 11107117  | 11107251  | THSD7B | chr2 | 138375933 | 138376059 |
| SMARCA4 | chr19 | 11107242  | 11107319  | THSD7B | chr2 | 138376045 | 138376119 |

|         |       |          |          |        |      |           |           |
|---------|-------|----------|----------|--------|------|-----------|-----------|
| SMARCA4 | chr19 | 11113608 | 11113740 | THSD7B | chr2 | 138378088 | 138378199 |
| SMARCA4 | chr19 | 11113729 | 11113836 | THSD7B | chr2 | 138378189 | 138378307 |
| SMARCA4 | chr19 | 11113788 | 11113911 | THSD7B | chr2 | 138399994 | 138400070 |
| SMARCA4 | chr19 | 11113928 | 11114007 | THSD7B | chr2 | 138400059 | 138400179 |
| SMARCA4 | chr19 | 11113996 | 11114123 | THSD7B | chr2 | 138400145 | 138400232 |
| SMARCA4 | chr19 | 11118506 | 11118629 | THSD7B | chr2 | 138412961 | 138413085 |
| SMARCA4 | chr19 | 11118565 | 11118661 | THSD7B | chr2 | 138413073 | 138413196 |
| SMARCA4 | chr19 | 11120966 | 11121071 | THSD7B | chr2 | 138413182 | 138413283 |
| SMARCA4 | chr19 | 11121060 | 11121174 | THSD7B | chr2 | 138414354 | 138414480 |
| SMARCA4 | chr19 | 11121163 | 11121291 | THSD7B | chr2 | 138414469 | 138414549 |
| SMARCA4 | chr19 | 11123560 | 11123651 | THSD7B | chr2 | 138414538 | 138414663 |
| SMARCA4 | chr19 | 11123640 | 11123764 | THSD7B | chr2 | 138414652 | 138414740 |
| SMARCA4 | chr19 | 11123751 | 11123838 | THSD7B | chr2 | 138417220 | 138417329 |
| SMARCA4 | chr19 | 11129509 | 11129603 | THSD7B | chr2 | 138420935 | 138421053 |
| SMARCA4 | chr19 | 11129592 | 11129712 | THSD7B | chr2 | 138421045 | 138421166 |
| SMARCA4 | chr19 | 11129701 | 11129785 | THSD7B | chr2 | 138425307 | 138425410 |
| SMARCA4 | chr19 | 11130103 | 11130232 | THSD7B | chr2 | 138425401 | 138425487 |
| SMARCA4 | chr19 | 11130250 | 11130339 | THSD7B | chr2 | 138434073 | 138434195 |
| SMARCA4 | chr19 | 11130328 | 11130457 | TSC1   | chr9 | 135771531 | 135771657 |
| SMARCA4 | chr19 | 11132339 | 11132428 | TSC1   | chr9 | 135771646 | 135771773 |
| SMARCA4 | chr19 | 11132417 | 11132526 | TSC1   | chr9 | 135771764 | 135771861 |
| SMARCA4 | chr19 | 11132490 | 11132598 | TSC1   | chr9 | 135771851 | 135771977 |
| SMARCA4 | chr19 | 11132586 | 11132693 | TSC1   | chr9 | 135771943 | 135772072 |
| SMARCA4 | chr19 | 11134136 | 11134267 | TSC1   | chr9 | 135772032 | 135772121 |
| SMARCA4 | chr19 | 11134230 | 11134333 | TSC1   | chr9 | 135772110 | 135772188 |
| SMARCA4 | chr19 | 11134322 | 11134449 | TSC1   | chr9 | 135772531 | 135772661 |
| SMARCA4 | chr19 | 11134912 | 11135009 | TSC1   | chr9 | 135772650 | 135772766 |
| SMARCA4 | chr19 | 11134998 | 11135101 | TSC1   | chr9 | 135772742 | 135772837 |
| SMARCA4 | chr19 | 11135093 | 11135192 | TSC1   | chr9 | 135772826 | 135772954 |
| SMARCA4 | chr19 | 11135975 | 11136108 | TSC1   | chr9 | 135772943 | 135773044 |
| SMARCA4 | chr19 | 11136089 | 11136220 | TSC1   | chr9 | 135776005 | 135776123 |
| SMARCA4 | chr19 | 11136183 | 11136276 | TSC1   | chr9 | 135776112 | 135776234 |
| SMARCA4 | chr19 | 11136900 | 11137010 | TSC1   | chr9 | 135776952 | 135777055 |
| SMARCA4 | chr19 | 11136995 | 11137078 | TSC1   | chr9 | 135777044 | 135777162 |
| SMARCA4 | chr19 | 11138396 | 11138501 | TSC1   | chr9 | 135777880 | 135778005 |
| SMARCA4 | chr19 | 11138490 | 11138574 | TSC1   | chr9 | 135777994 | 135778091 |
| SMARCA4 | chr19 | 11138563 | 11138681 | TSC1   | chr9 | 135778080 | 135778184 |
| SMARCA4 | chr19 | 11141344 | 11141463 | TSC1   | chr9 | 135778995 | 135779116 |
| SMARCA4 | chr19 | 11141452 | 11141534 | TSC1   | chr9 | 135779051 | 135779140 |
| SMARCA4 | chr19 | 11141523 | 11141619 | TSC1   | chr9 | 135779738 | 135779858 |

|         |       |          |          |      |       |           |           |
|---------|-------|----------|----------|------|-------|-----------|-----------|
| SMARCA4 | chr19 | 11143907 | 11144039 | TSC1 | chr9  | 135780946 | 135781054 |
| SMARCA4 | chr19 | 11144021 | 11144112 | TSC1 | chr9  | 135781031 | 135781122 |
| SMARCA4 | chr19 | 11144101 | 11144223 | TSC1 | chr9  | 135781111 | 135781235 |
| SMARCA4 | chr19 | 11144197 | 11144290 | TSC1 | chr9  | 135781224 | 135781351 |
| SMARCA4 | chr19 | 11144315 | 11144414 | TSC1 | chr9  | 135781328 | 135781429 |
| SMARCA4 | chr19 | 11144398 | 11144518 | TSC1 | chr9  | 135781462 | 135781564 |
| SMARCA4 | chr19 | 11144573 | 11144703 | TSC1 | chr9  | 135782009 | 135782129 |
| SMARCA4 | chr19 | 11144711 | 11144817 | TSC1 | chr9  | 135782118 | 135782232 |
| SMARCA4 | chr19 | 11144806 | 11144932 | TSC1 | chr9  | 135782661 | 135782783 |
| SMARCA4 | chr19 | 11145535 | 11145668 | TSC1 | chr9  | 135785863 | 135785987 |
| SMARCA4 | chr19 | 11145687 | 11145802 | TSC1 | chr9  | 135785952 | 135786078 |
| SMARCA4 | chr19 | 11145788 | 11145898 | TSC1 | chr9  | 135786072 | 135786167 |
| SMARCA4 | chr19 | 11150062 | 11150135 | TSC1 | chr9  | 135786278 | 135786403 |
| SMARCA4 | chr19 | 11150121 | 11150206 | TSC1 | chr9  | 135786392 | 135786510 |
| SMARCA4 | chr19 | 11150195 | 11150295 | TSC1 | chr9  | 135786782 | 135786906 |
| SMARCA4 | chr19 | 11151839 | 11151960 | TSC1 | chr9  | 135786895 | 135786981 |
| SMARCA4 | chr19 | 11151949 | 11152044 | TSC1 | chr9  | 135787643 | 135787765 |
| SMARCA4 | chr19 | 11152038 | 11152170 | TSC1 | chr9  | 135787754 | 135787857 |
| SMARCA4 | chr19 | 11152166 | 11152295 | TSC1 | chr9  | 135796714 | 135796833 |
| SMARCA4 | chr19 | 11168855 | 11168979 | TSC1 | chr9  | 135797140 | 135797267 |
| SMARCA4 | chr19 | 11168968 | 11169102 | TSC1 | chr9  | 135797256 | 135797375 |
| SMARCA4 | chr19 | 11169361 | 11169468 | TSC1 | chr9  | 135798657 | 135798772 |
| SMARCA4 | chr19 | 11169447 | 11169530 | TSC1 | chr9  | 135798761 | 135798889 |
| SMARCA4 | chr19 | 11169513 | 11169634 | TSC1 | chr9  | 135800912 | 135801028 |
| SMARCA4 | chr19 | 11170321 | 11170443 | TSC1 | chr9  | 135801017 | 135801137 |
| SMARCA4 | chr19 | 11170432 | 11170554 | TSC1 | chr9  | 135802545 | 135802665 |
| SMARCA4 | chr19 | 11170556 | 11170686 | TSC1 | chr9  | 135802654 | 135802732 |
| SMARCA4 | chr19 | 11170702 | 11170818 | TSC1 | chr9  | 135804114 | 135804238 |
| SMARCA4 | chr19 | 11170738 | 11170847 | TSC1 | chr9  | 135804172 | 135804295 |
| SMARCA4 | chr19 | 11172369 | 11172477 | TSC2 | chr16 | 2098563   | 2098652   |
| SMARCA4 | chr19 | 11172474 | 11172557 | TSC2 | chr16 | 2098641   | 2098764   |
| SMARCA4 | chr19 | 11094812 | 11094945 | TSC2 | chr16 | 2100286   | 2100410   |
| SMARCA4 | chr19 | 11094907 | 11095037 | TSC2 | chr16 | 2100399   | 2100498   |
| SMARCA4 | chr19 | 11095033 | 11095141 | TSC2 | chr16 | 2103239   | 2103374   |
| SMARCA4 | chr19 | 11095876 | 11096008 | TSC2 | chr16 | 2103363   | 2103496   |
| SMARCA4 | chr19 | 11096008 | 11096102 | TSC2 | chr16 | 2104240   | 2104344   |
| SMARCA4 | chr19 | 11096820 | 11096939 | TSC2 | chr16 | 2104333   | 2104458   |
| SMARCA4 | chr19 | 11096931 | 11097067 | TSC2 | chr16 | 2105365   | 2105464   |
| SMARCA4 | chr19 | 11097063 | 11097178 | TSC2 | chr16 | 2105453   | 2105530   |
| SMARCA4 | chr19 | 11097172 | 11097291 | TSC2 | chr16 | 2106110   | 2106230   |

|         |       |          |          |      |       |         |         |
|---------|-------|----------|----------|------|-------|---------|---------|
| SMARCA4 | chr19 | 11097561 | 11097690 | TSC2 | chr16 | 2106214 | 2106310 |
| SMARCA4 | chr19 | 11098335 | 11098455 | TSC2 | chr16 | 2106577 | 2106696 |
| SMARCA4 | chr19 | 11098390 | 11098524 | TSC2 | chr16 | 2106685 | 2106780 |
| SMARCA4 | chr19 | 11098579 | 11098679 | TSC2 | chr16 | 2107016 | 2107145 |
| SMARCA4 | chr19 | 11099892 | 11100023 | TSC2 | chr16 | 2107123 | 2107252 |
| SMARCA4 | chr19 | 11100023 | 11100155 | TSC2 | chr16 | 2108732 | 2108862 |
| SMARCA4 | chr19 | 11101814 | 11101952 | TSC2 | chr16 | 2108853 | 2108973 |
| SMARCA4 | chr19 | 11101952 | 11102078 | TSC2 | chr16 | 2110567 | 2110698 |
| SMARCA4 | chr19 | 11105487 | 11105568 | TSC2 | chr16 | 2110687 | 2110769 |
| SMARCA4 | chr19 | 11105568 | 11105692 | TSC2 | chr16 | 2110750 | 2110872 |
| SMARCA4 | chr19 | 11106872 | 11106966 | TSC2 | chr16 | 2111854 | 2111964 |
| SMARCA4 | chr19 | 11106966 | 11107097 | TSC2 | chr16 | 2111952 | 2112079 |
| SMARCA4 | chr19 | 11107119 | 11107255 | TSC2 | chr16 | 2112369 | 2112503 |
| SMARCA4 | chr19 | 11113608 | 11113710 | TSC2 | chr16 | 2112492 | 2112612 |
| SMARCA4 | chr19 | 11113709 | 11113836 | TSC2 | chr16 | 2113055 | 2113185 |
| SMARCA4 | chr19 | 11113831 | 11113917 | TSC2 | chr16 | 2114211 | 2114321 |
| SMARCA4 | chr19 | 11113991 | 11114121 | TSC2 | chr16 | 2114301 | 2114415 |
| SMARCA4 | chr19 | 11118569 | 11118658 | TSC2 | chr16 | 2114404 | 2114507 |
| SMARCA4 | chr19 | 11118658 | 11118764 | TSC2 | chr16 | 2115461 | 2115588 |
| SMARCA4 | chr19 | 11121015 | 11121142 | TSC2 | chr16 | 2115569 | 2115694 |
| SMARCA4 | chr19 | 11121141 | 11121239 | TSC2 | chr16 | 2120424 | 2120554 |
| SMARCA4 | chr19 | 11123577 | 11123701 | TSC2 | chr16 | 2121498 | 2121595 |
| SMARCA4 | chr19 | 11123694 | 11123789 | TSC2 | chr16 | 2121584 | 2121681 |
| SMARCA4 | chr19 | 11129592 | 11129725 | TSC2 | chr16 | 2121704 | 2121799 |
| SMARCA4 | chr19 | 11130251 | 11130338 | TSC2 | chr16 | 2121797 | 2121922 |
| SMARCA4 | chr19 | 11130336 | 11130464 | TSC2 | chr16 | 2122181 | 2122293 |
| SMARCA4 | chr19 | 11132349 | 11132439 | TSC2 | chr16 | 2122264 | 2122351 |
| SMARCA4 | chr19 | 11132433 | 11132557 | TSC2 | chr16 | 2122729 | 2122859 |
| SMARCA4 | chr19 | 11132548 | 11132665 | TSC2 | chr16 | 2122848 | 2122959 |
| SMARCA4 | chr19 | 11134182 | 11134317 | TSC2 | chr16 | 2122948 | 2123053 |
| SMARCA4 | chr19 | 11134996 | 11135096 | TSC2 | chr16 | 2124094 | 2124209 |
| SMARCA4 | chr19 | 11135094 | 11135192 | TSC2 | chr16 | 2124214 | 2124318 |
| SMARCA4 | chr19 | 11136088 | 11136220 | TSC2 | chr16 | 2124307 | 2124412 |
| SMARCA4 | chr19 | 11136951 | 11137059 | TSC2 | chr16 | 2125863 | 2125997 |
| SMARCA4 | chr19 | 11138421 | 11138505 | TSC2 | chr16 | 2126001 | 2126096 |
| SMARCA4 | chr19 | 11138505 | 11138631 | TSC2 | chr16 | 2126085 | 2126187 |
| SMARCA4 | chr19 | 11141347 | 11141469 | TSC2 | chr16 | 2126404 | 2126532 |
| SMARCA4 | chr19 | 11141469 | 11141588 | TSC2 | chr16 | 2126521 | 2126653 |
| SMARCA4 | chr19 | 11143958 | 11144091 | TSC2 | chr16 | 2127494 | 2127618 |
| SMARCA4 | chr19 | 11144088 | 11144224 | TSC2 | chr16 | 2127607 | 2127714 |

|         |       |          |          |      |       |         |         |
|---------|-------|----------|----------|------|-------|---------|---------|
| SMARCA4 | chr19 | 11144781 | 11144902 | TSC2 | chr16 | 2127713 | 2127805 |
| SMARCA4 | chr19 | 11145515 | 11145649 | TSC2 | chr16 | 2128962 | 2129069 |
| SMARCA4 | chr19 | 11145604 | 11145730 | TSC2 | chr16 | 2129042 | 2129166 |
| SMARCA4 | chr19 | 11145729 | 11145864 | TSC2 | chr16 | 2129155 | 2129253 |
| SMARCA4 | chr19 | 11151960 | 11152050 | TSC2 | chr16 | 2129259 | 2129378 |
| SMARCA4 | chr19 | 11152047 | 11152169 | TSC2 | chr16 | 2129347 | 2129430 |
| SMARCA4 | chr19 | 11152165 | 11152291 | TSC2 | chr16 | 2129547 | 2129658 |
| SMARCA4 | chr19 | 11168921 | 11169047 | TSC2 | chr16 | 2129588 | 2129714 |
| SMARCA4 | chr19 | 11169446 | 11169537 | TSC2 | chr16 | 2130122 | 2130227 |
| SMARCA4 | chr19 | 11169535 | 11169634 | TSC2 | chr16 | 2130188 | 2130292 |
| SMARCA4 | chr19 | 11170419 | 11170558 | TSC2 | chr16 | 2130281 | 2130401 |
| SMARCA4 | chr19 | 11170665 | 11170758 | TSC2 | chr16 | 2131576 | 2131673 |
| SMARCA4 | chr19 | 11170758 | 11170853 | TSC2 | chr16 | 2131662 | 2131787 |
| SMARCA4 | chr19 | 11172408 | 11172544 | TSC2 | chr16 | 2131742 | 2131864 |
| TSC2    | chr16 | 2098562  | 2098648  | TSC2 | chr16 | 2132387 | 2132489 |
| TSC2    | chr16 | 2098648  | 2098764  | TSC2 | chr16 | 2132467 | 2132591 |
| TSC2    | chr16 | 2100380  | 2100507  | TSC2 | chr16 | 2133629 | 2133766 |
| TSC2    | chr16 | 2103212  | 2103343  | TSC2 | chr16 | 2133772 | 2133904 |
| TSC2    | chr16 | 2103341  | 2103468  | TSC2 | chr16 | 2134145 | 2134250 |
| TSC2    | chr16 | 2104243  | 2104346  | TSC2 | chr16 | 2134242 | 2134373 |
| TSC2    | chr16 | 2104346  | 2104464  | TSC2 | chr16 | 2134467 | 2134604 |
| TSC2    | chr16 | 2105325  | 2105456  | TSC2 | chr16 | 2134662 | 2134761 |
| TSC2    | chr16 | 2105456  | 2105532  | TSC2 | chr16 | 2134956 | 2135050 |
| TSC2    | chr16 | 2106130  | 2106232  | TSC2 | chr16 | 2135242 | 2135377 |
| TSC2    | chr16 | 2106595  | 2106723  | TSC2 | chr16 | 2136098 | 2136231 |
| TSC2    | chr16 | 2106722  | 2106829  | TSC2 | chr16 | 2136222 | 2136344 |
| TSC2    | chr16 | 2107094  | 2107206  | TSC2 | chr16 | 2136368 | 2136503 |
| TSC2    | chr16 | 2108734  | 2108865  | TSC2 | chr16 | 2136664 | 2136760 |
| TSC2    | chr16 | 2108865  | 2108973  | TSC2 | chr16 | 2136746 | 2136829 |
| TSC2    | chr16 | 2110606  | 2110745  | TSC2 | chr16 | 2136818 | 2136947 |
| TSC2    | chr16 | 2110745  | 2110871  | TSC2 | chr16 | 2137783 | 2137903 |
| TSC2    | chr16 | 2111854  | 2111972  | TSC2 | chr16 | 2137892 | 2138025 |
| TSC2    | chr16 | 2111972  | 2112070  | TSC2 | chr16 | 2137946 | 2138080 |
| TSC2    | chr16 | 2112487  | 2112614  | TSC2 | chr16 | 2138076 | 2138183 |
| TSC2    | chr16 | 2112921  | 2113018  | TSC2 | chr16 | 2138201 | 2138318 |
| TSC2    | chr16 | 2114213  | 2114327  | TSC2 | chr16 | 2138295 | 2138401 |
| TSC2    | chr16 | 2114327  | 2114454  | TSC2 | chr16 | 2138459 | 2138585 |
| TSC2    | chr16 | 2115463  | 2115587  | TSC2 | chr16 | 2138554 | 2138639 |
| TSC2    | chr16 | 2115578  | 2115696  |      |       |         |         |
| TSC2    | chr16 | 2120424  | 2120528  |      |       |         |         |

|      |       |         |         |
|------|-------|---------|---------|
| TSC2 | chr16 | 2120524 | 2120652 |
| TSC2 | chr16 | 2121502 | 2121596 |
| TSC2 | chr16 | 2121593 | 2121681 |
| TSC2 | chr16 | 2121704 | 2121792 |
| TSC2 | chr16 | 2121791 | 2121929 |
| TSC2 | chr16 | 2121928 | 2122044 |
| TSC2 | chr16 | 2122197 | 2122322 |
| TSC2 | chr16 | 2122320 | 2122414 |
| TSC2 | chr16 | 2122843 | 2122952 |
| TSC2 | chr16 | 2122952 | 2123055 |
| TSC2 | chr16 | 2124193 | 2124301 |
| TSC2 | chr16 | 2124301 | 2124422 |
| TSC2 | chr16 | 2125749 | 2125850 |
| TSC2 | chr16 | 2125849 | 2125939 |
| TSC2 | chr16 | 2126041 | 2126176 |
| TSC2 | chr16 | 2126481 | 2126573 |
| TSC2 | chr16 | 2126572 | 2126666 |
| TSC2 | chr16 | 2127522 | 2127652 |
| TSC2 | chr16 | 2127652 | 2127752 |
| TSC2 | chr16 | 2128975 | 2129063 |
| TSC2 | chr16 | 2129052 | 2129165 |
| TSC2 | chr16 | 2129165 | 2129254 |
| TSC2 | chr16 | 2129267 | 2129379 |
| TSC2 | chr16 | 2129367 | 2129505 |
| TSC2 | chr16 | 2129547 | 2129685 |
| TSC2 | chr16 | 2130130 | 2130259 |
| TSC2 | chr16 | 2130243 | 2130354 |
| TSC2 | chr16 | 2130340 | 2130448 |
| TSC2 | chr16 | 2131554 | 2131636 |
| TSC2 | chr16 | 2131635 | 2131735 |
| TSC2 | chr16 | 2131734 | 2131855 |
| TSC2 | chr16 | 2132412 | 2132545 |
| TSC2 | chr16 | 2133688 | 2133818 |
| TSC2 | chr16 | 2133816 | 2133918 |
| TSC2 | chr16 | 2134144 | 2134246 |
| TSC2 | chr16 | 2134241 | 2134367 |
| TSC2 | chr16 | 2134353 | 2134489 |
| TSC2 | chr16 | 2134487 | 2134625 |
| TSC2 | chr16 | 2134619 | 2134745 |
| TSC2 | chr16 | 2134882 | 2134996 |

|      |       |         |         |
|------|-------|---------|---------|
| TSC2 | chr16 | 2134996 | 2135133 |
| TSC2 | chr16 | 2135221 | 2135343 |
| TSC2 | chr16 | 2136169 | 2136272 |
| TSC2 | chr16 | 2136252 | 2136371 |
| TSC2 | chr16 | 2136371 | 2136504 |
| TSC2 | chr16 | 2136698 | 2136826 |
| TSC2 | chr16 | 2136826 | 2136955 |
| TSC2 | chr16 | 2137783 | 2137899 |
| TSC2 | chr16 | 2137896 | 2137998 |
| TSC2 | chr16 | 2138013 | 2138154 |
| TSC2 | chr16 | 2138197 | 2138334 |
| TSC2 | chr16 | 2138421 | 2138519 |
| TSC2 | chr16 | 2138507 | 2138639 |

---
